# Supplementary material for: Green tea polyphenols alleviate TBBPA-induced gastric inflammation and apoptosis by modulating the ROS-PERK/IRE-1/ATF6 pathway in mouse models
Source: Royal Society of Chemistry journal article supplement (doi:10.1039/d4fo03012e), 2024-01-01
Supplement: d4fo03012e1.pdf [file d4fo03012e1.pdf]

# Original diagram of the WB tissue experiment

Small proteins using M5 Prestained Protein Ladder (10-180 kDa) with 45kDa of Mei5bio

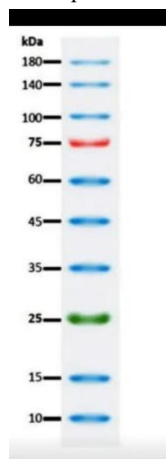

ATF-4 39KDa

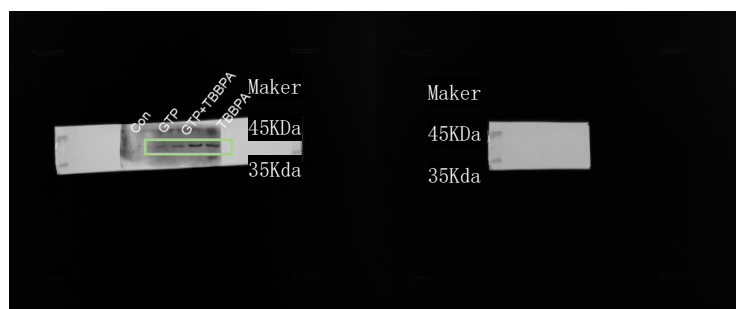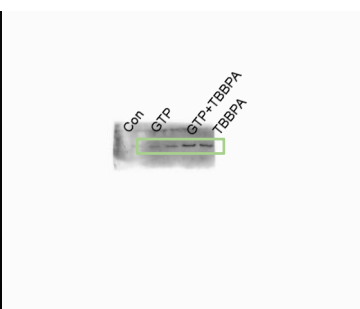

ATF-6 75KDa

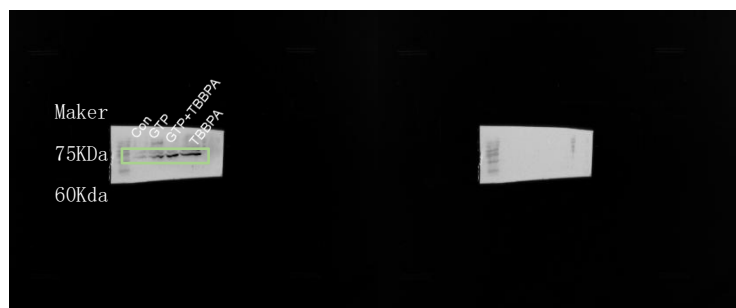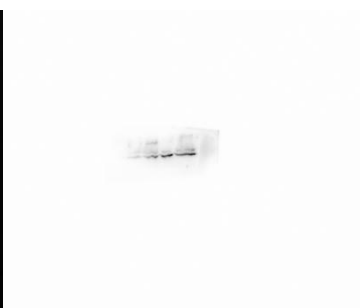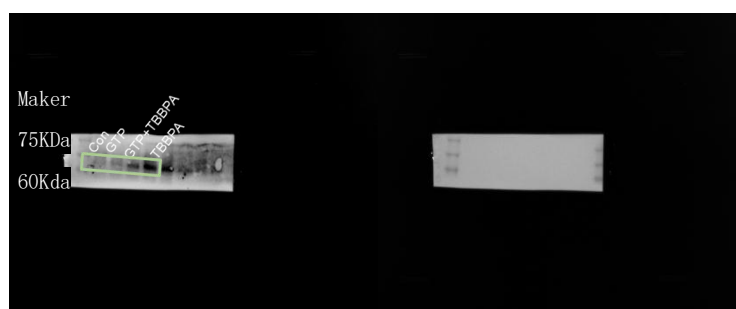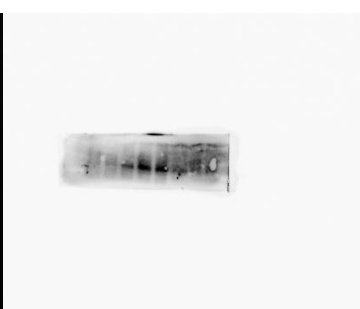

BAX 21KDa

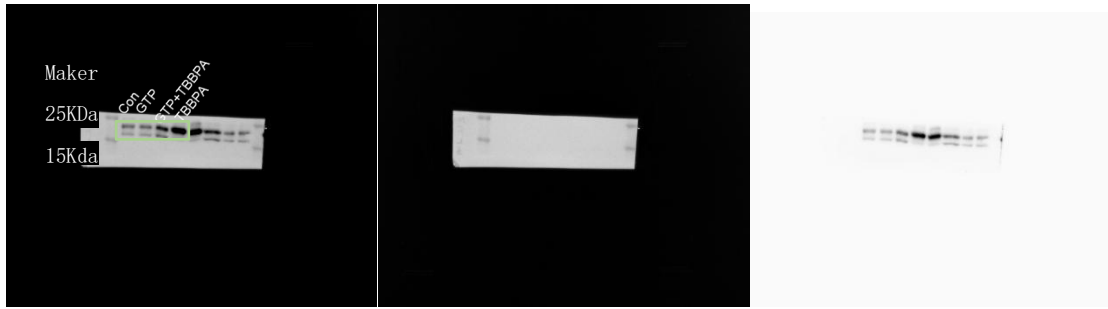

Caspase-3 32KDa

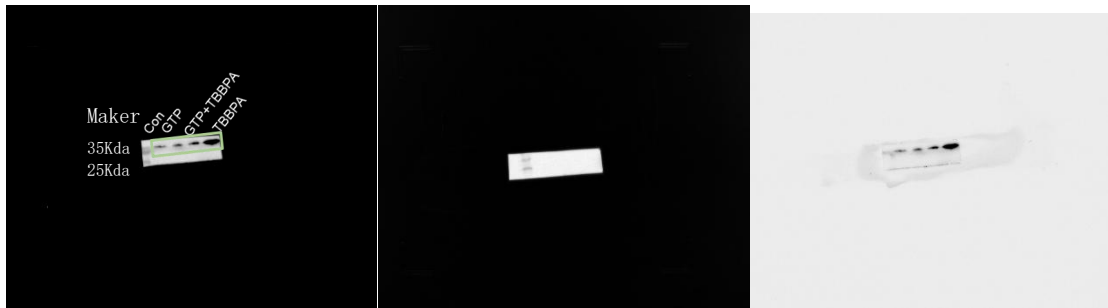

Caspase-7 35Kda

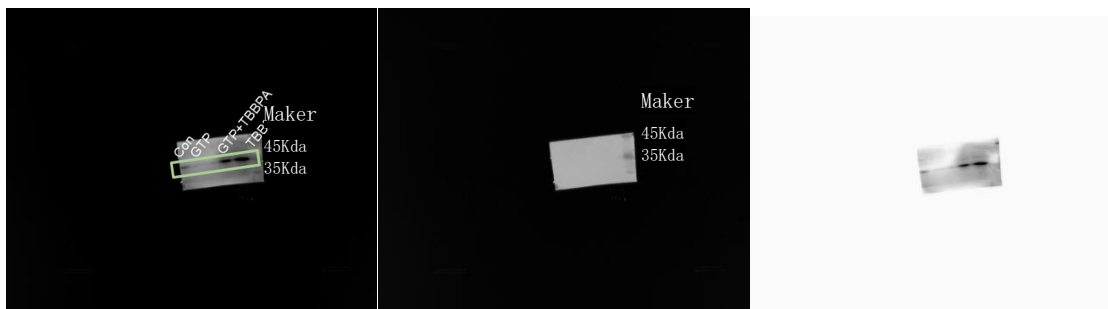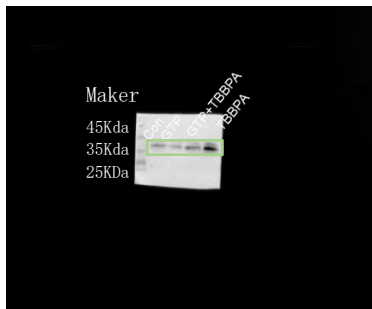

CHOP 19KDa

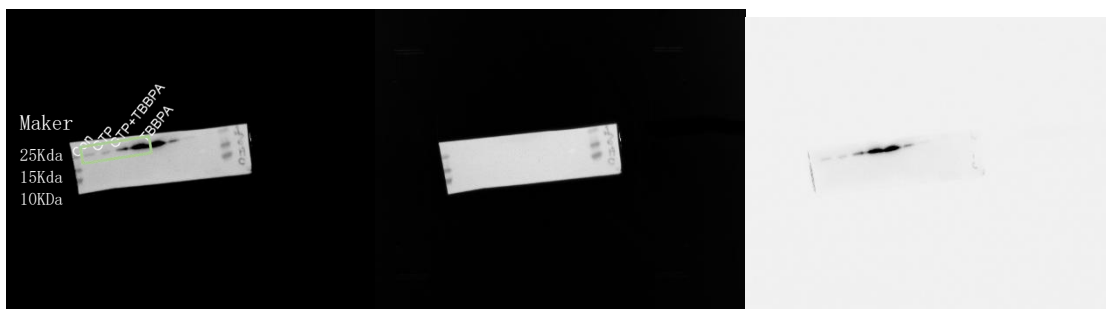

P-Eif-2 $\alpha$  38KDa

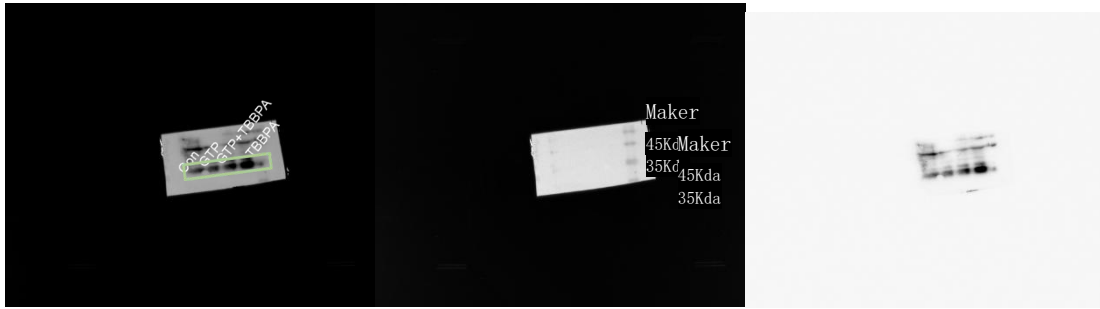

GAPDH 36Kda

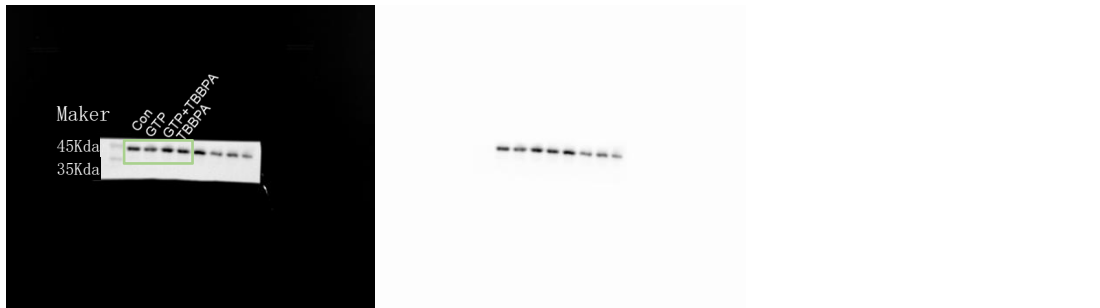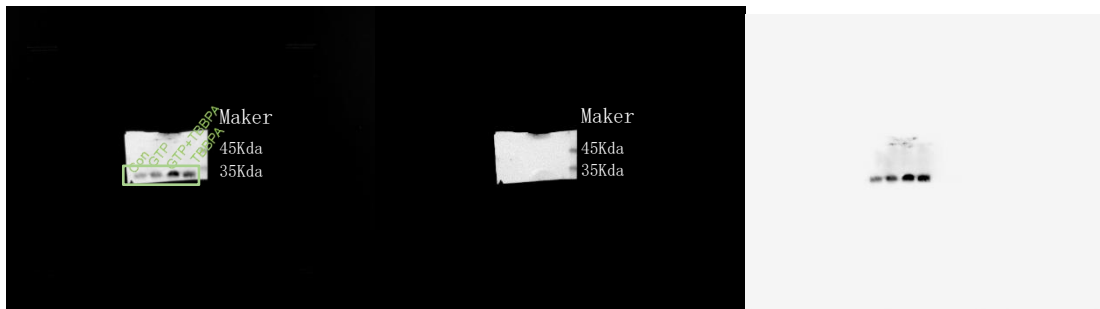

GRP78 78KDa

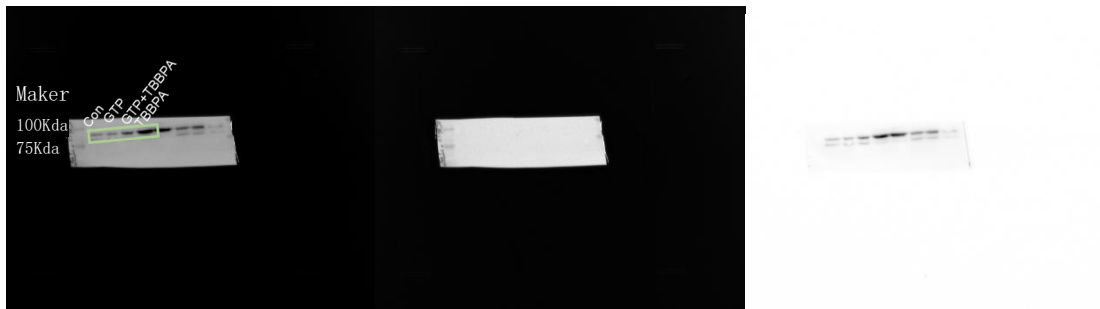

IK-B $\alpha$  32Kda

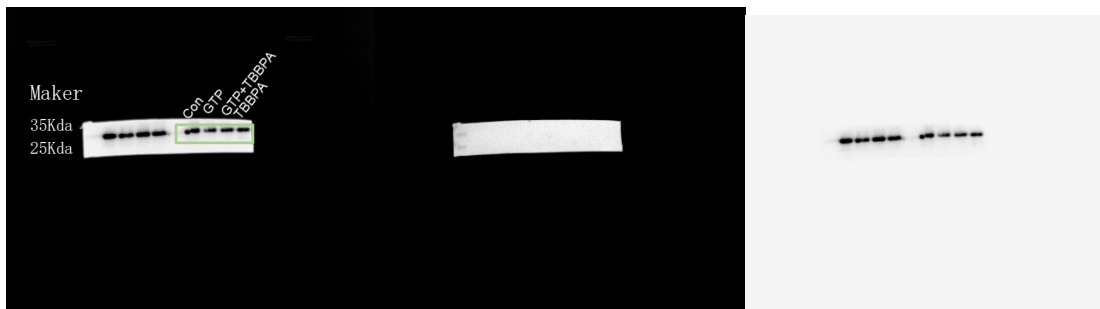

NF-KB 65Kda

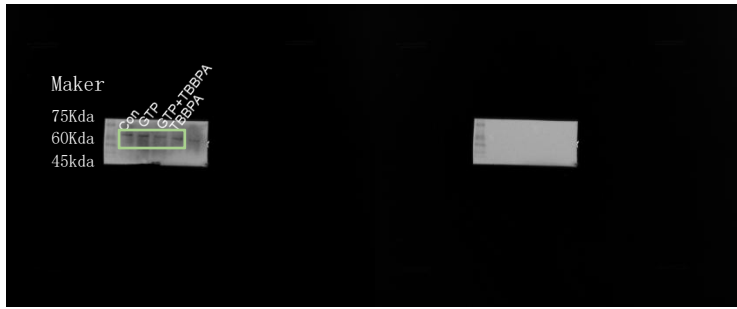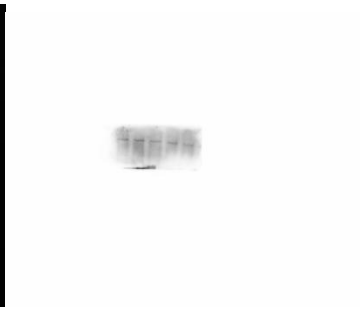

P-IKB- $\alpha$  32Kda

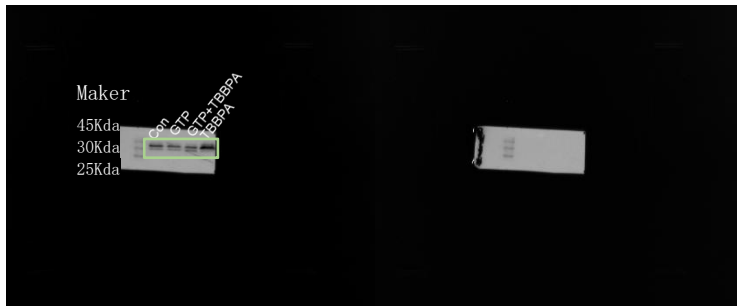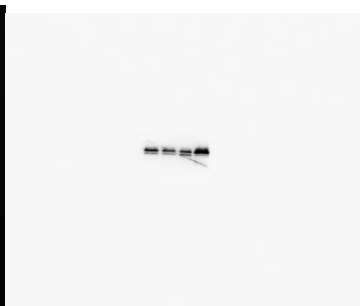

P-NF-KB 65Kda

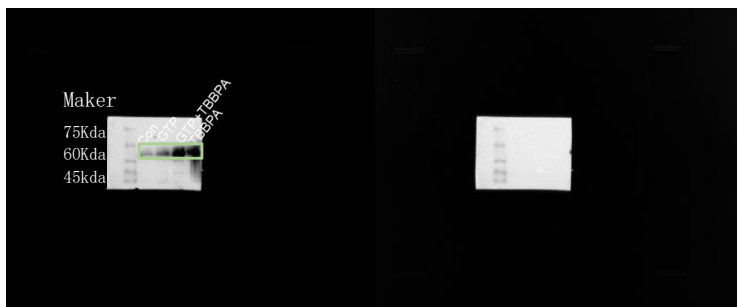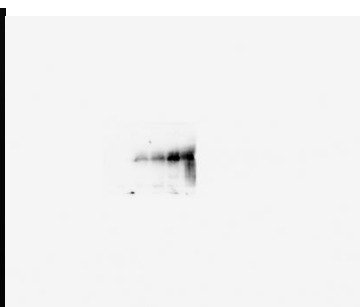

XBP-1 45-50KDa

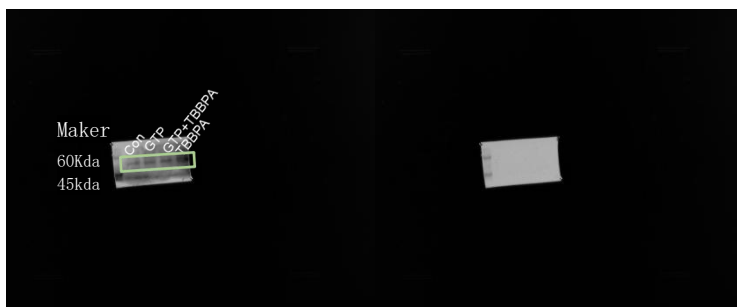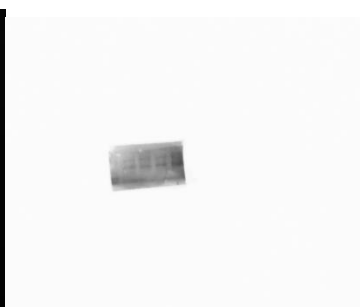

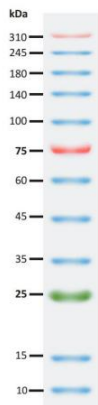

IRE-1 110Kda (use M5 SuperRange Prestained Protein Ladder (10-310 kDa of Mei5bio))

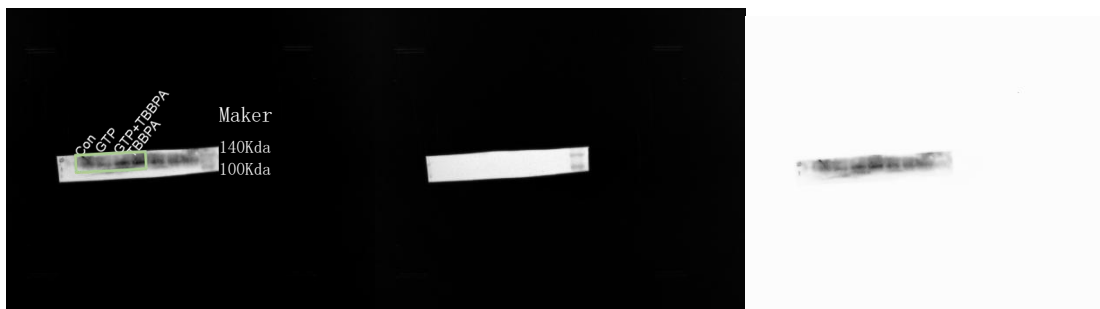

PERK 125Kda

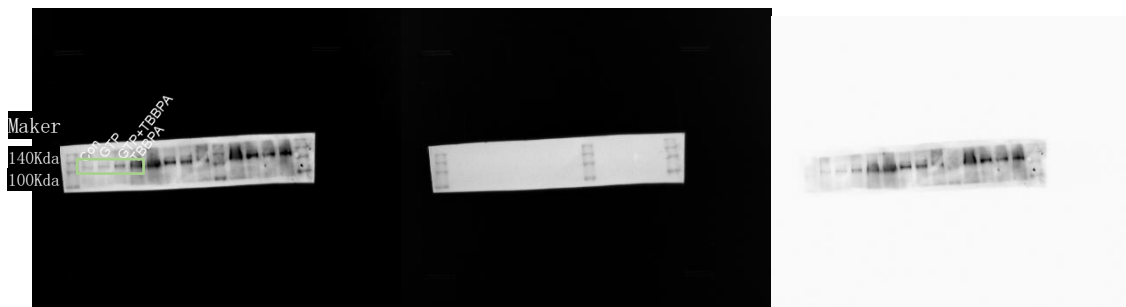

# Original diagram of the WB cell experiment

Small proteins using M5 Prestained Protein Ladder (10-180 kDa) with 45kDa of Mei5bio

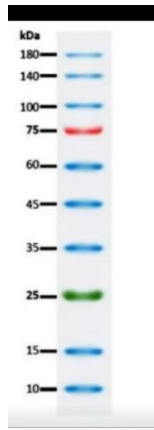

ATF-4 39Kda

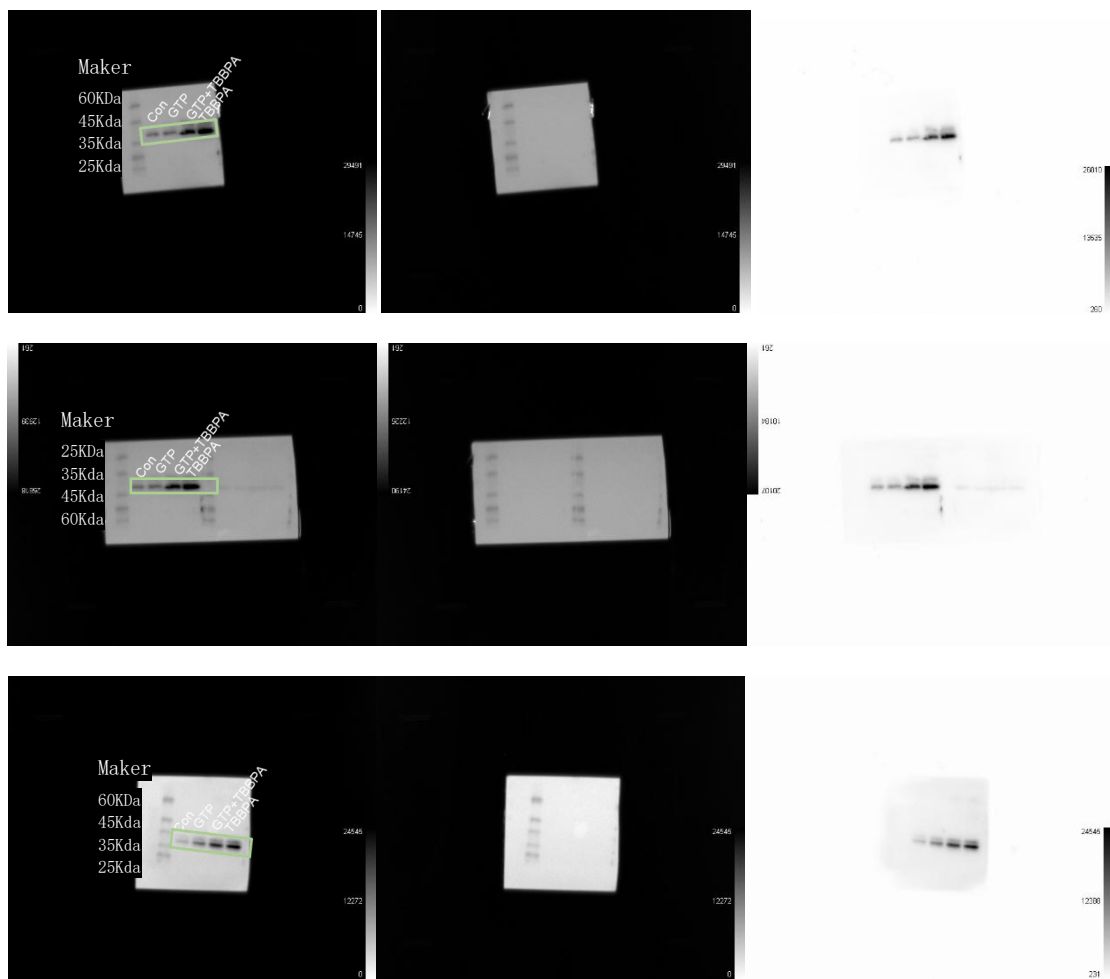

### ATF-6 75Kda

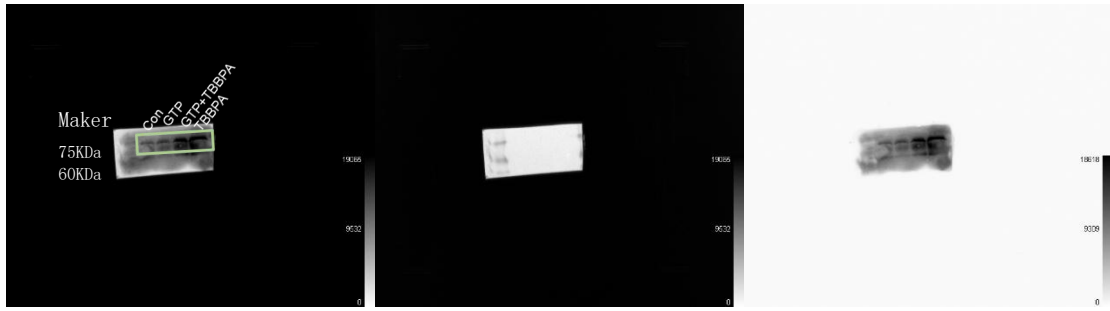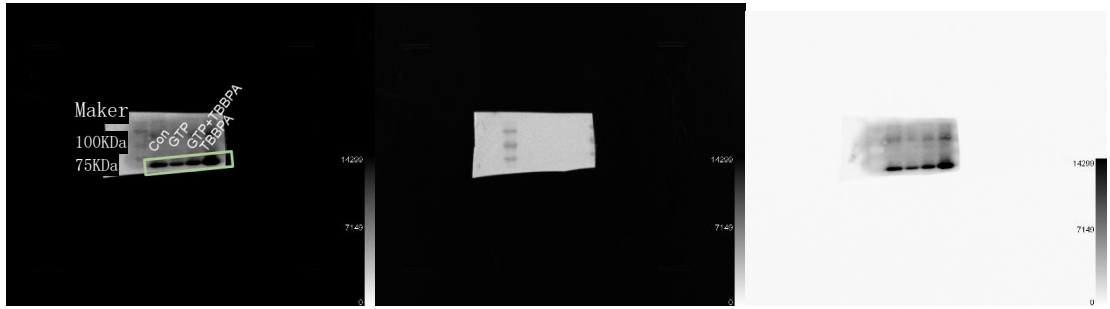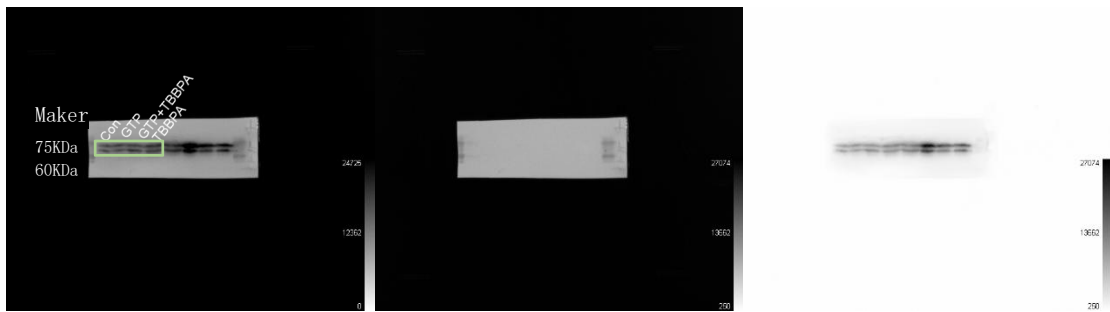

### BAX 21Kda

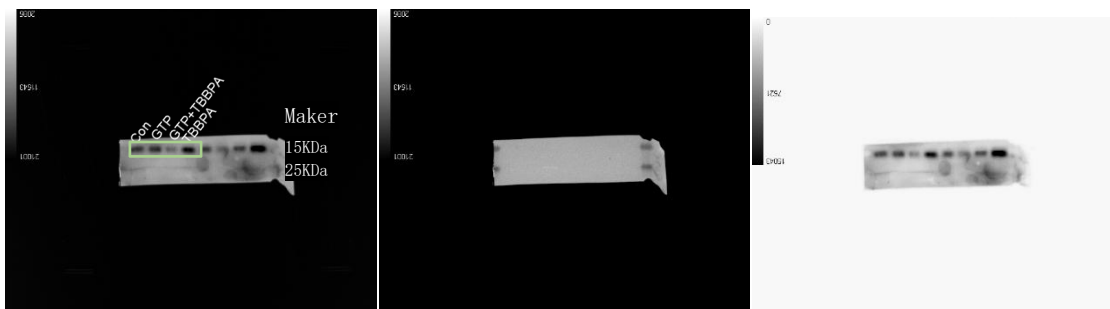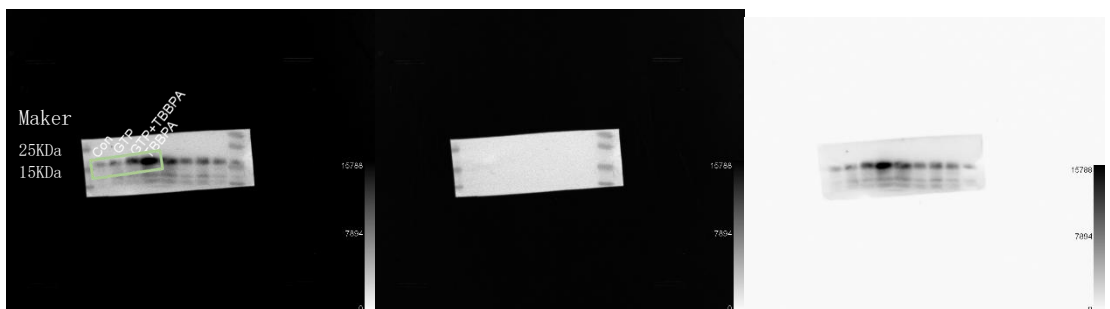

### BCL-2 26Kda

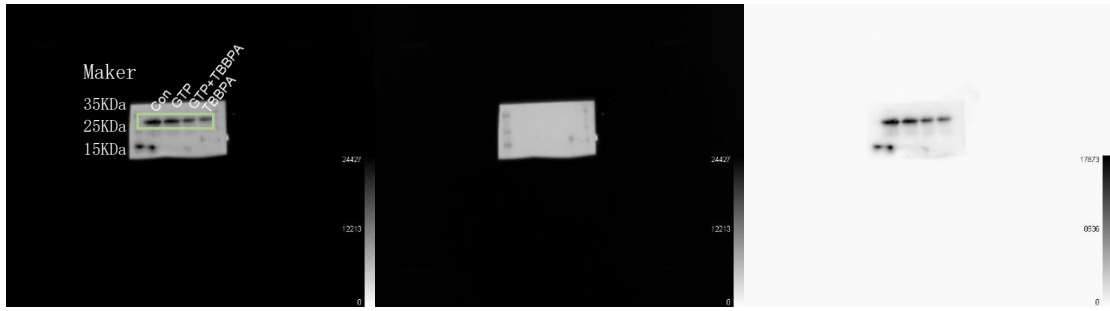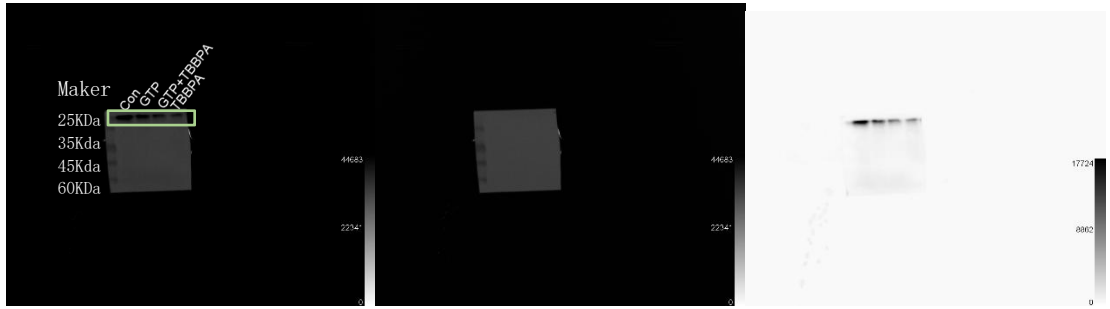

### Caspase-3 32Kda

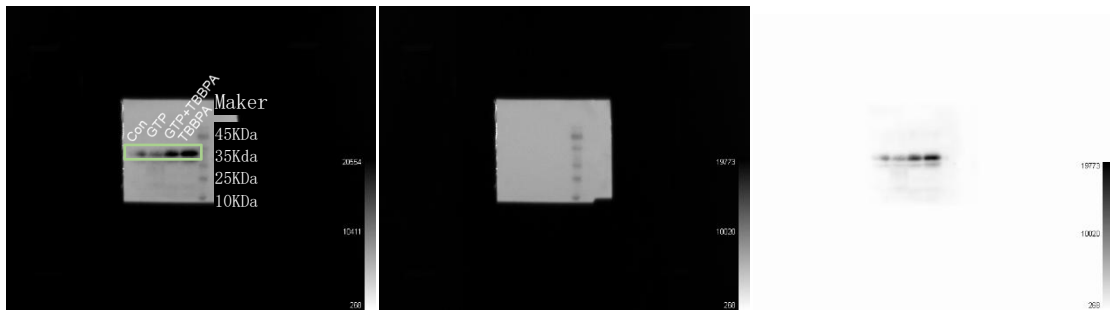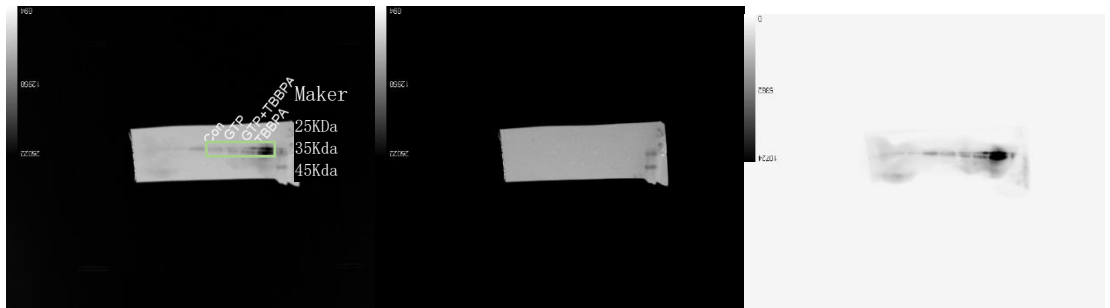

### Caspase-7 42Kda

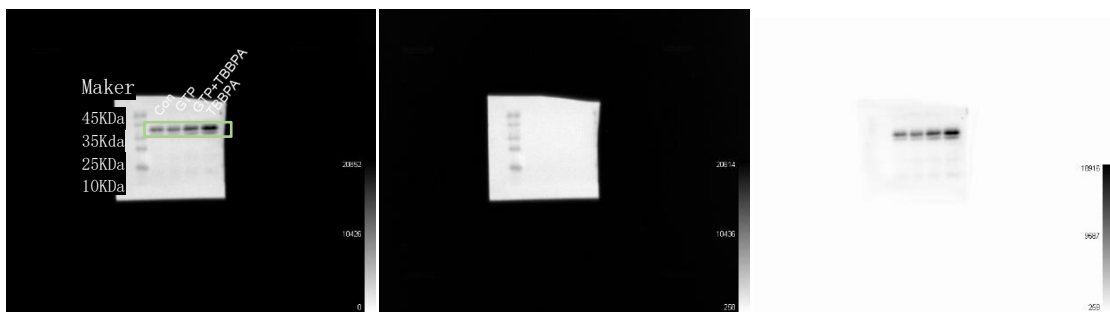



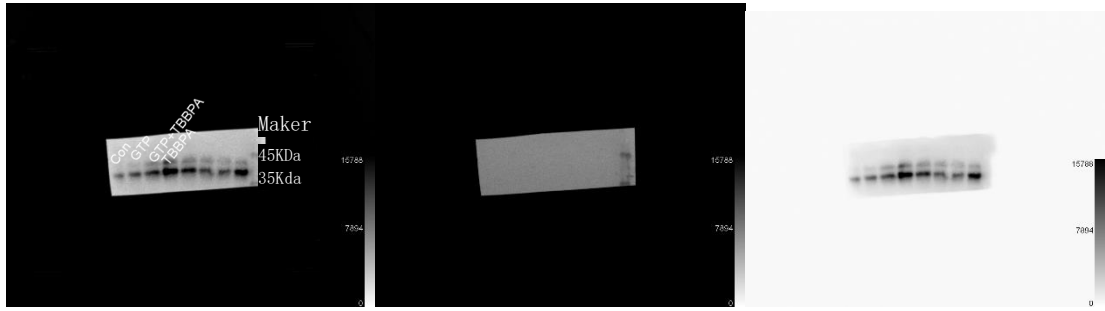

Caspase-8 57KDa

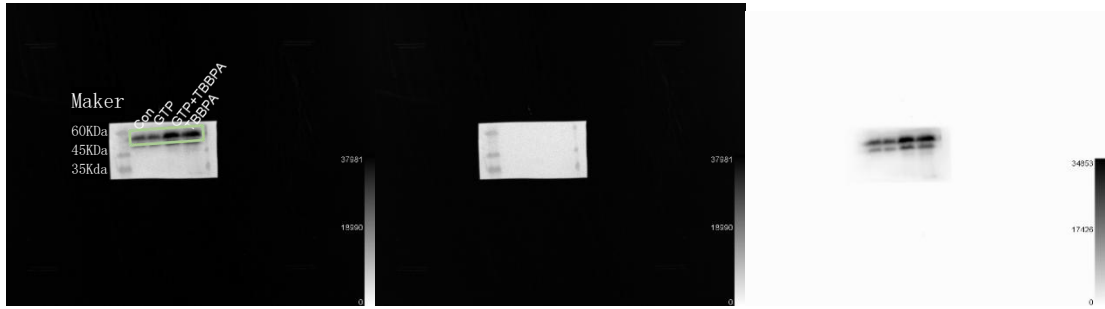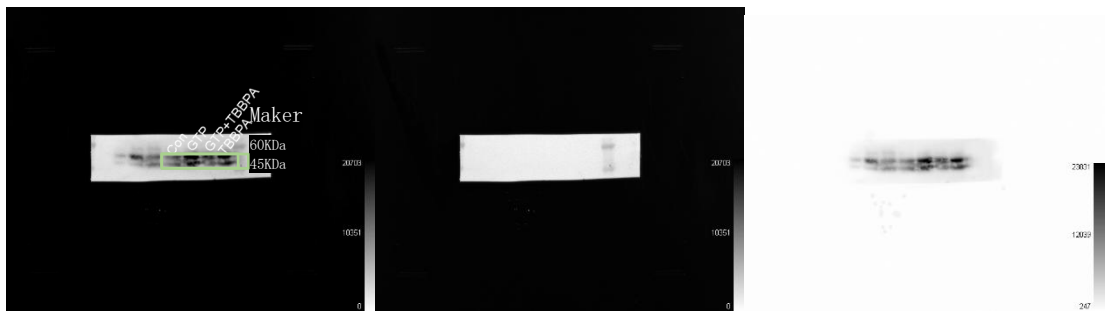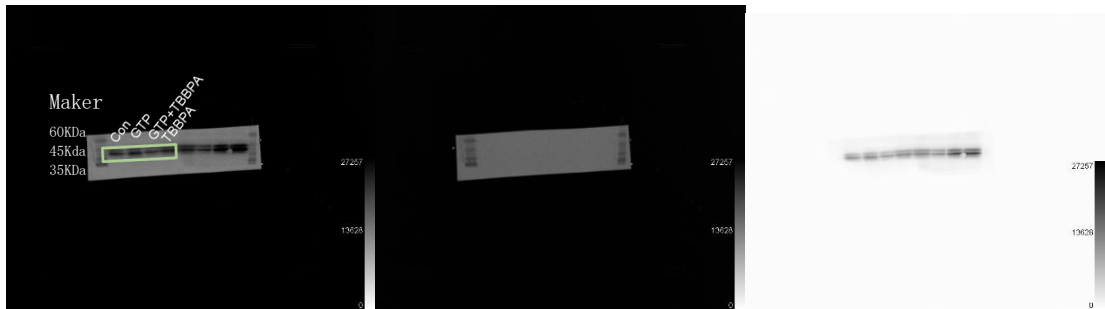

Caspase-9 47Kda

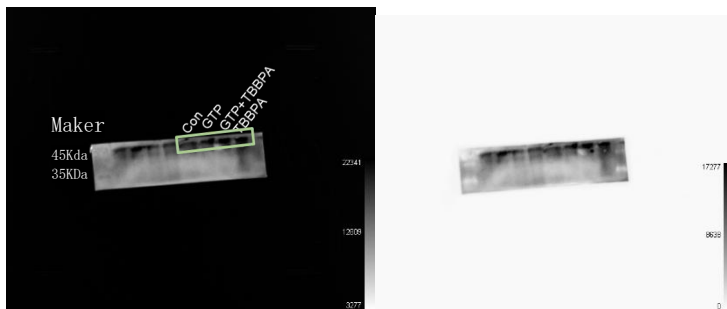

CHOP 19Kda

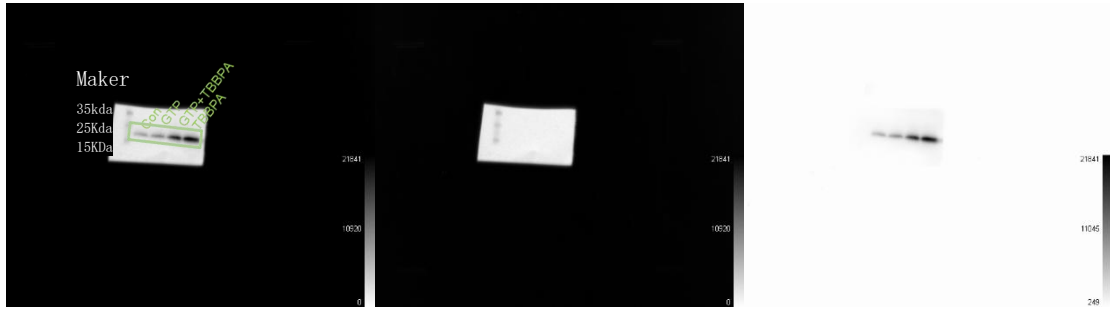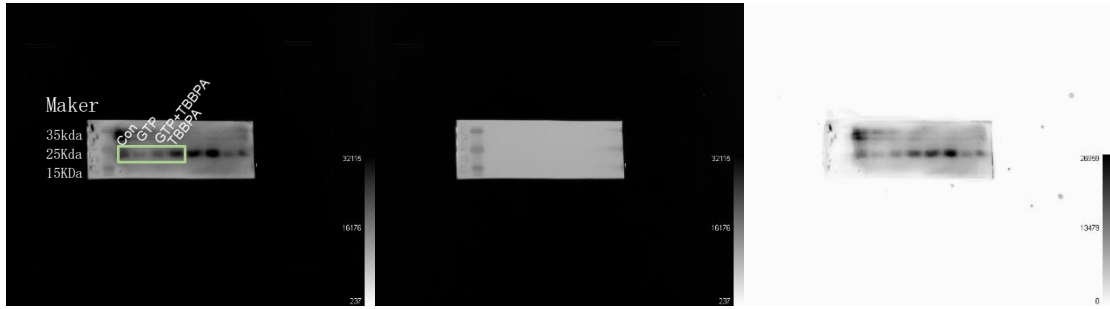

Eif-2 $\alpha$  38Kda

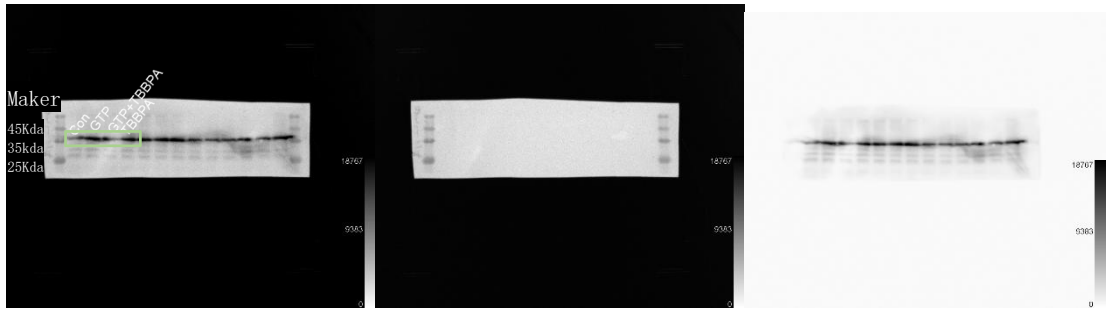

GRP78 78Kda

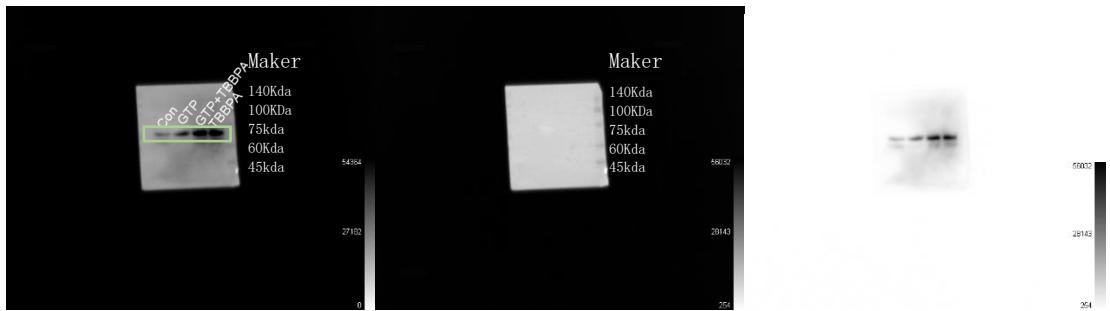

IK-B $\alpha$  32Kda

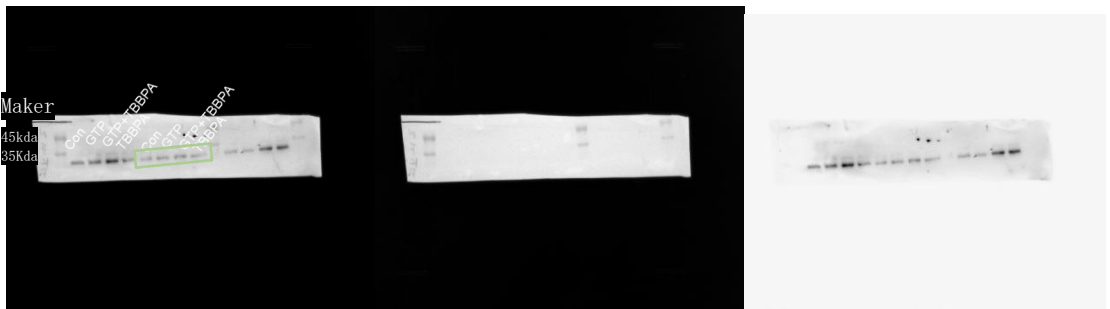

### NF-KB 65kda

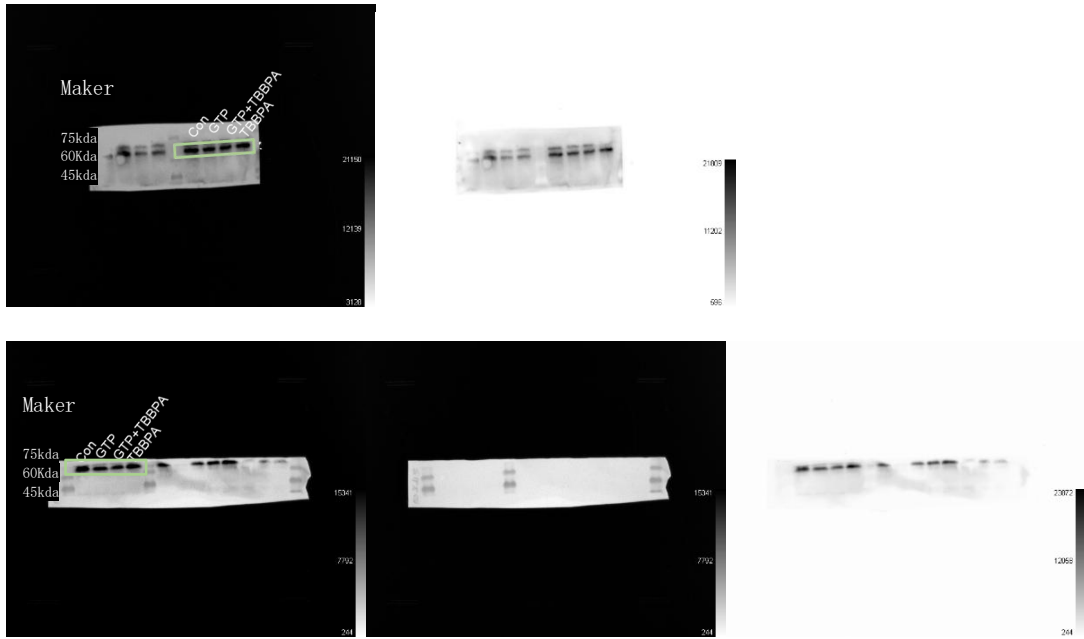

### P-eif-2 $\alpha$ 38Kda

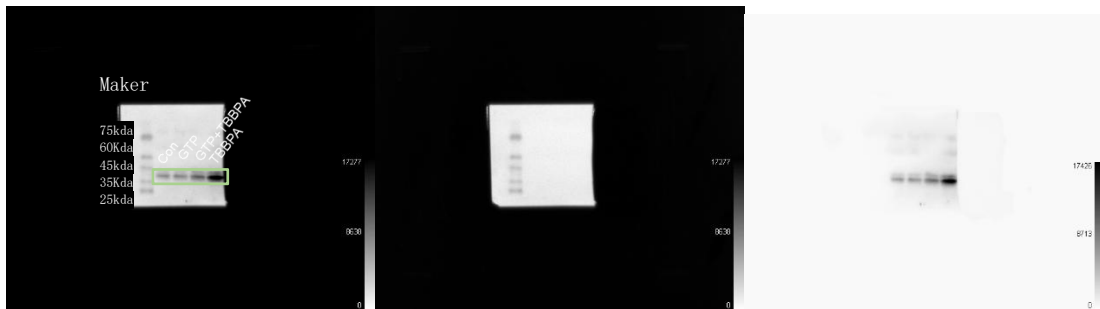

### P-IKB- $\alpha$ 32Kda

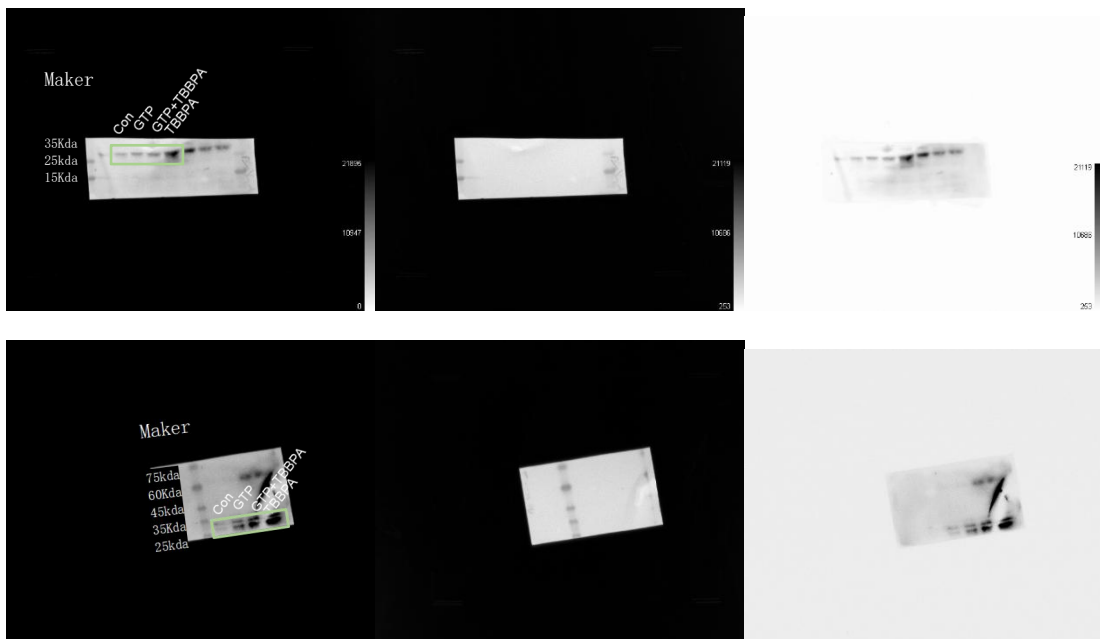

P-NF-KB 65kda

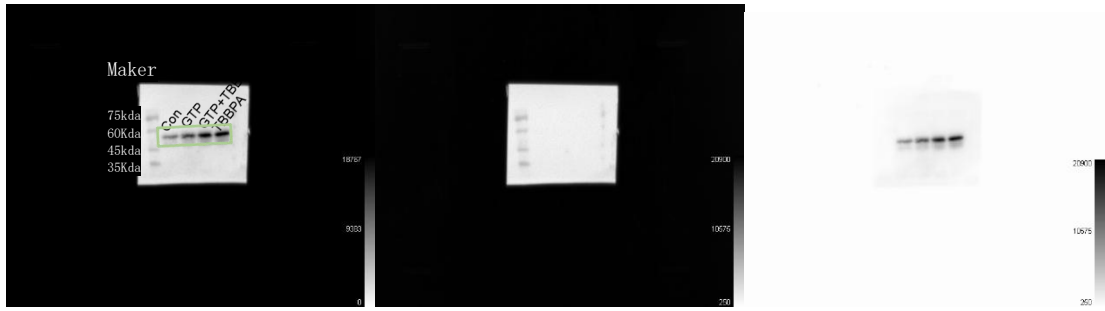

Xbp-1 45-50kda

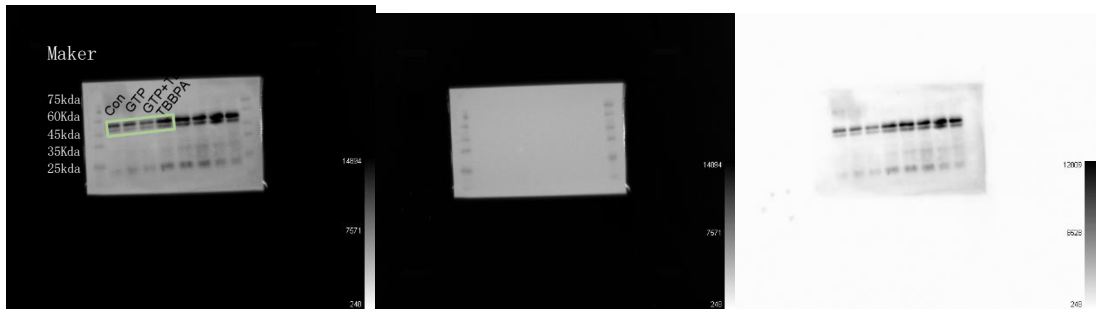

GAPDH 36Kda

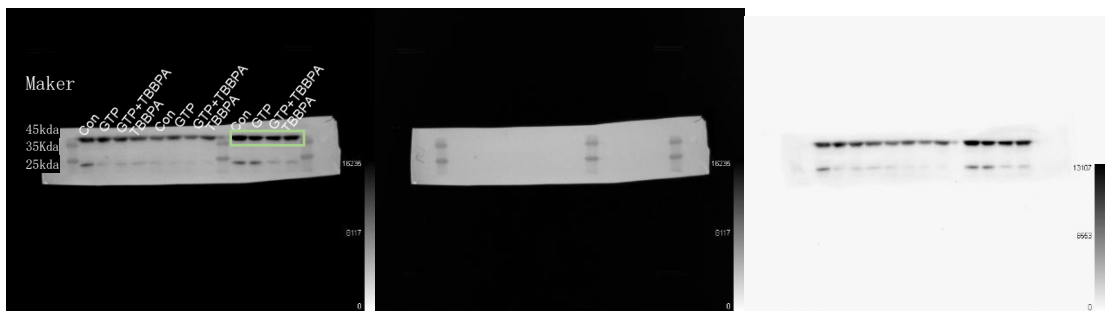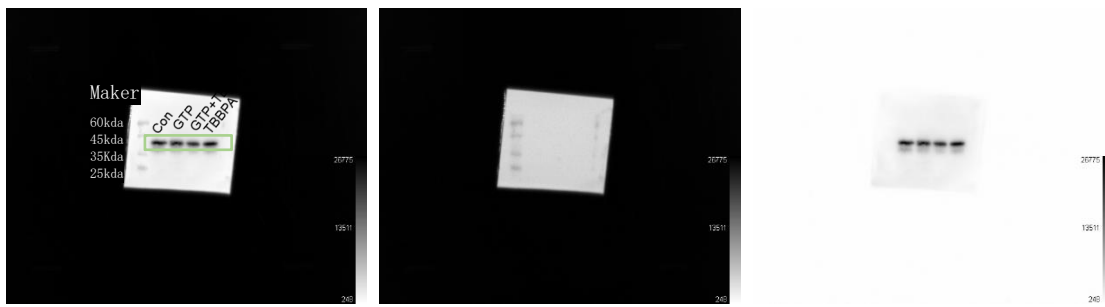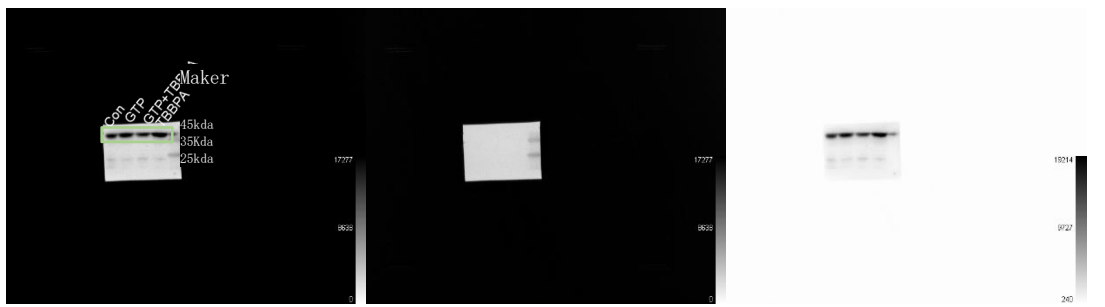

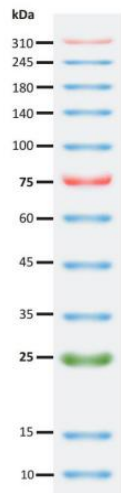

IRE-1 110kda(use M5 SuperRange Prestained Protein Ladder (10-310 kDa of Mei5bio))

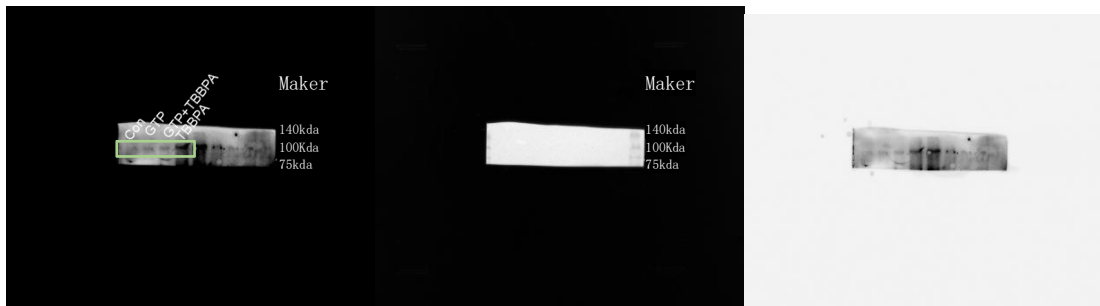

PERK 125kda

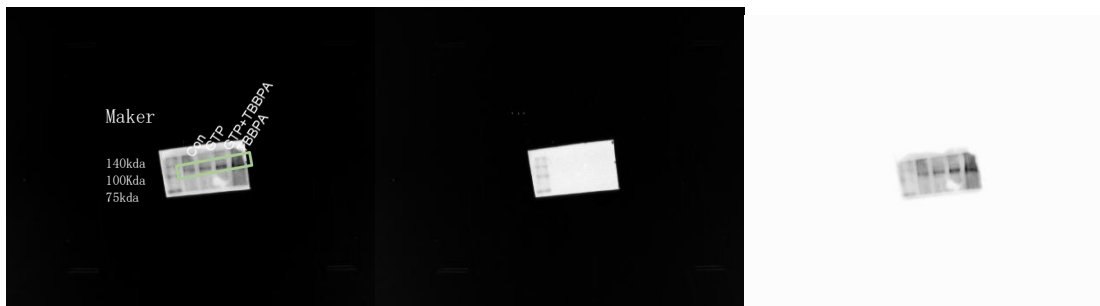

# Addition of antioxidant NAC

ATF4 39KDa

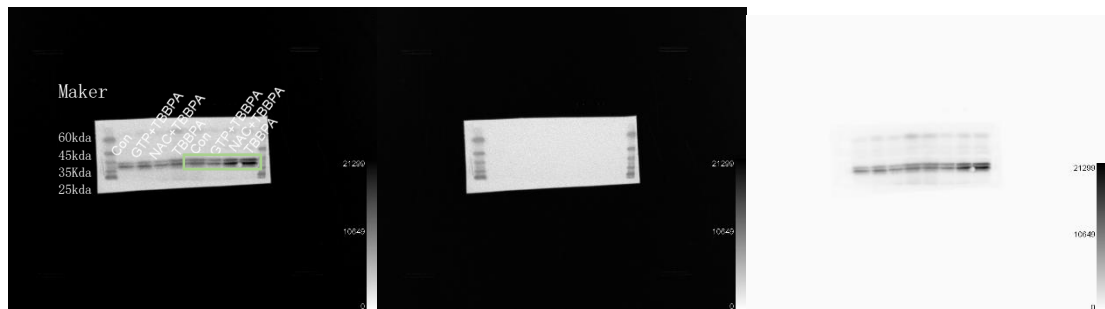

ATF-6 75KDa

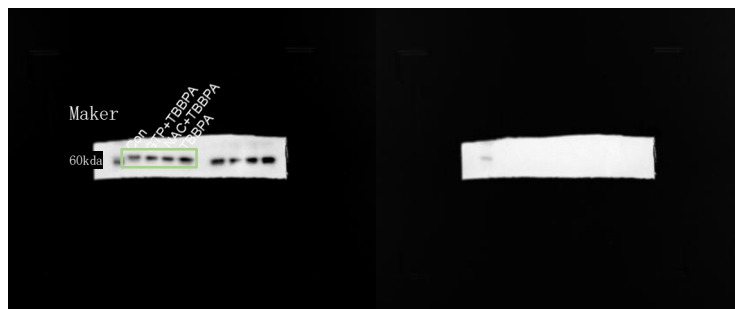

Bax 21kda

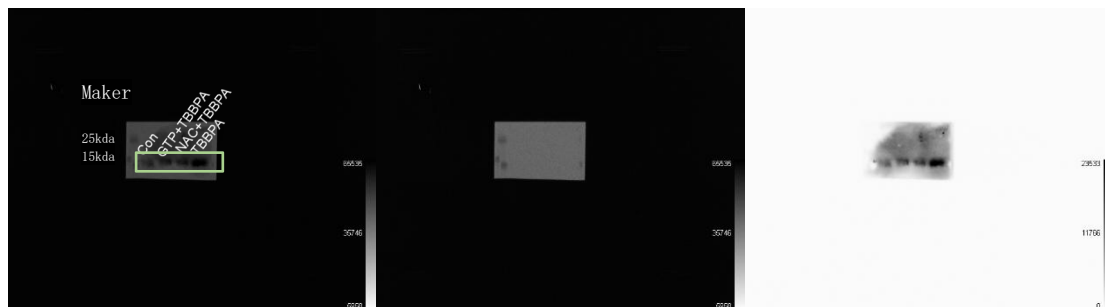

BCL-2 26kda

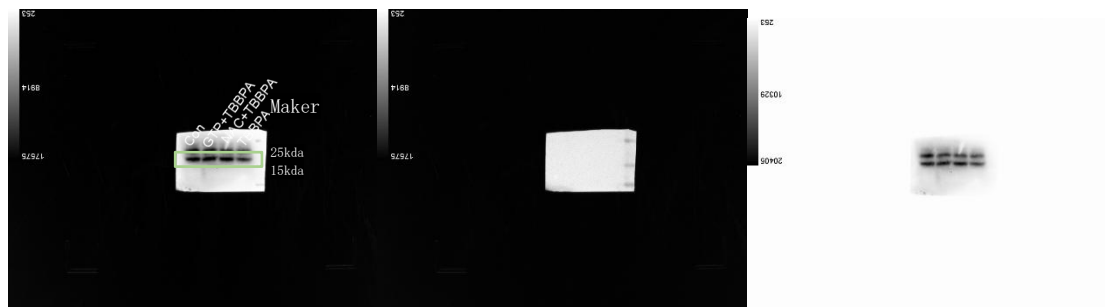

caspase-3 32kda

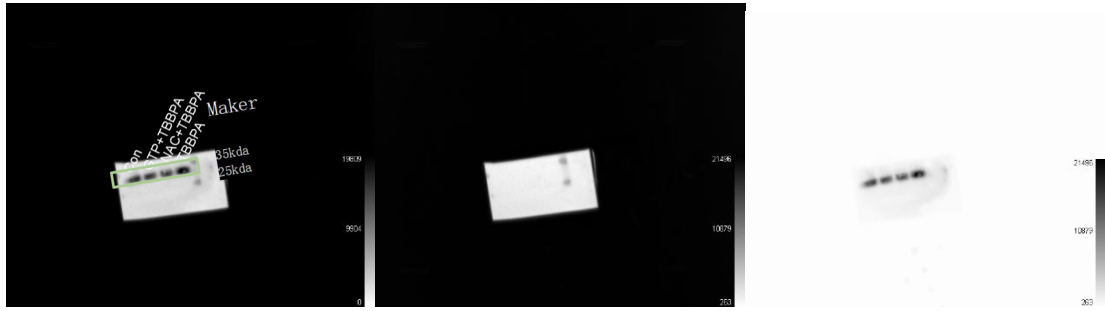

Caspase-7 35kda

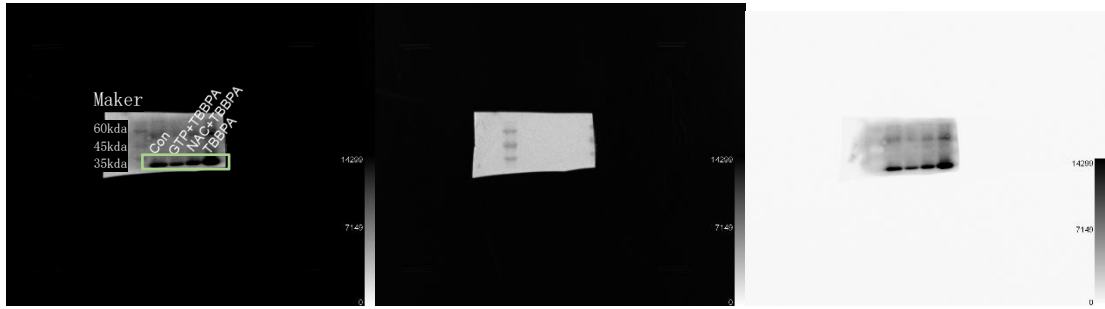

Caspase-8 57kda

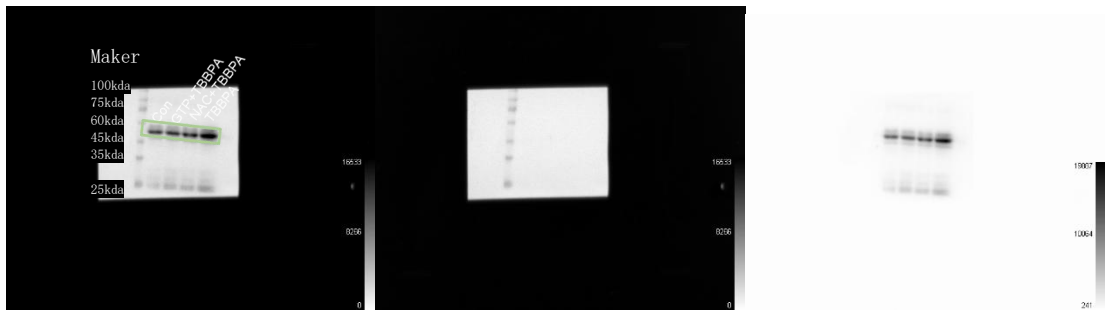

Caspase-9 47kda

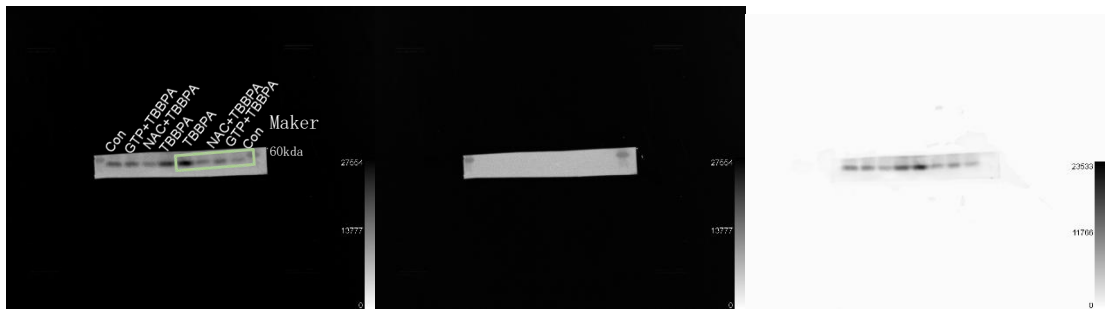

CHOP 19KDA

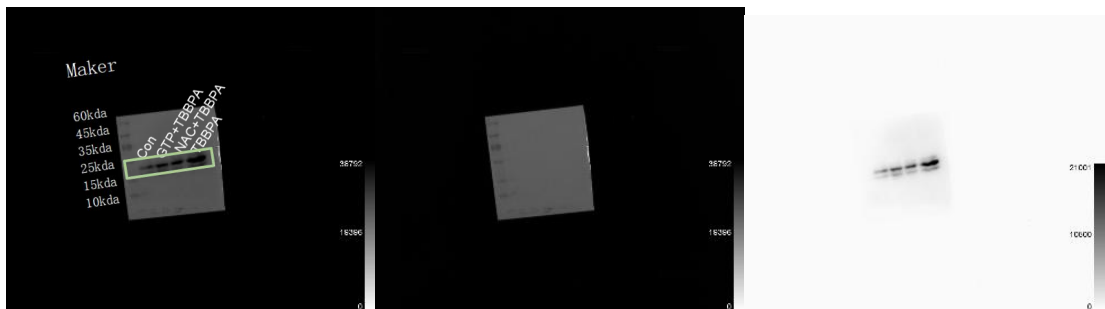

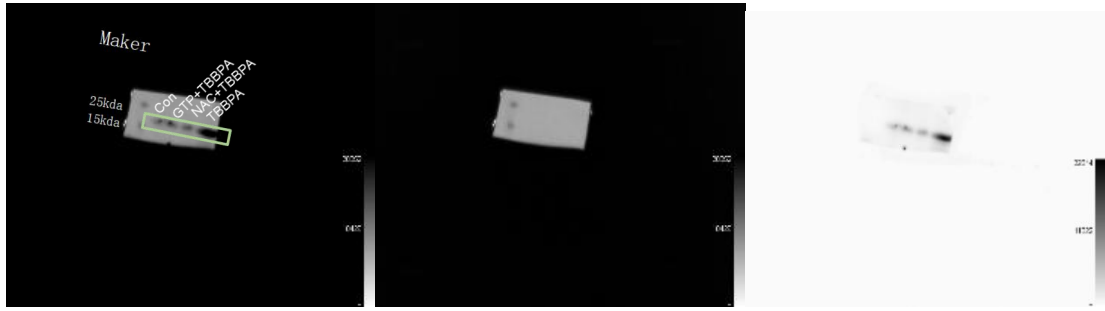

Eif-2α 38kda

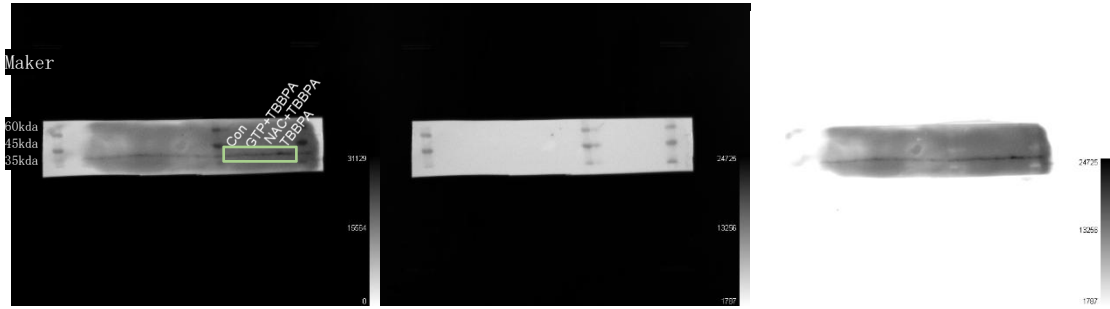

GRP78 78KDA

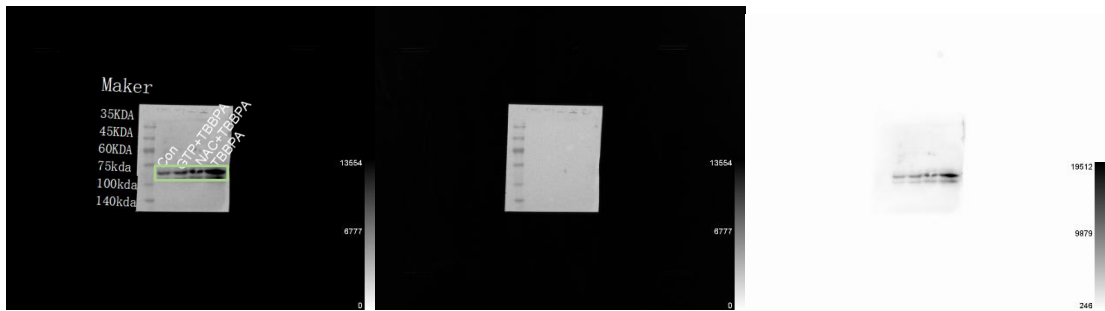

IKB-α 32kda

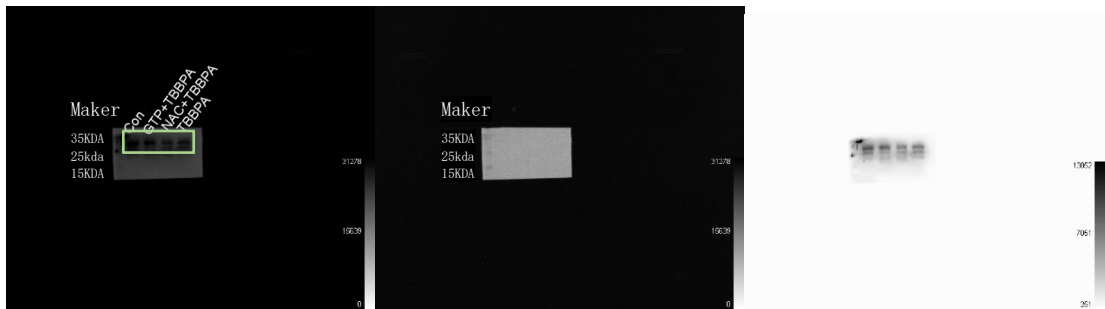

NF-KB 64kda



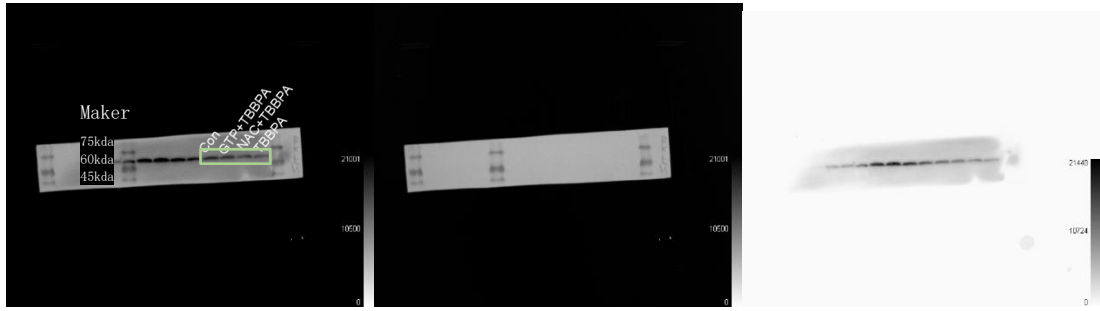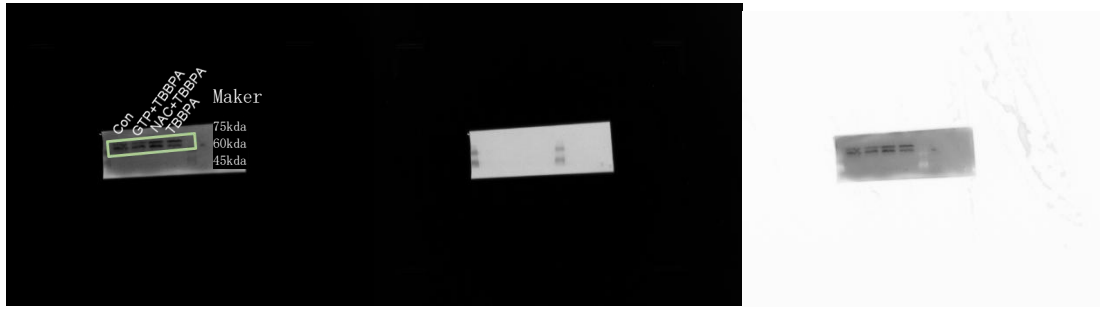

P-eif-2α 38kda

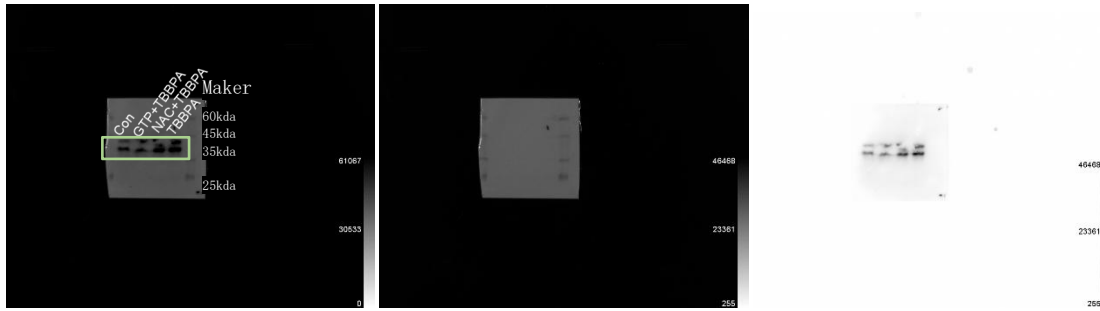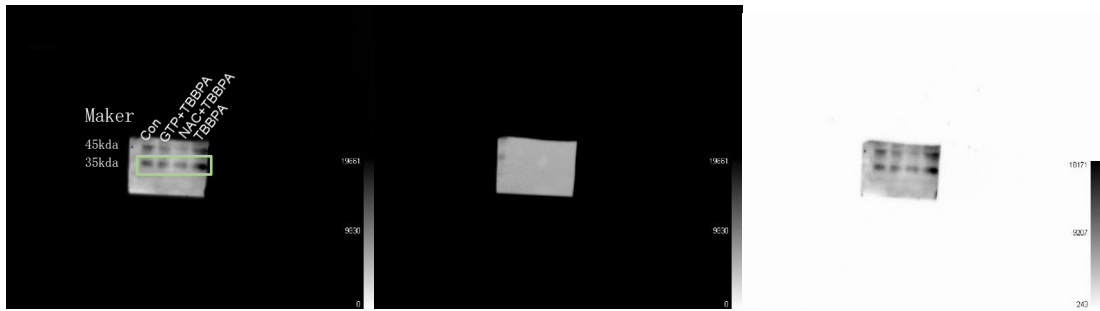

P-IKB 32kda

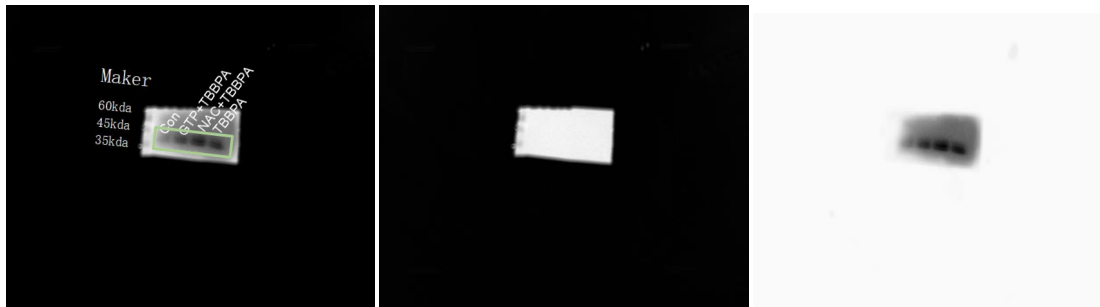

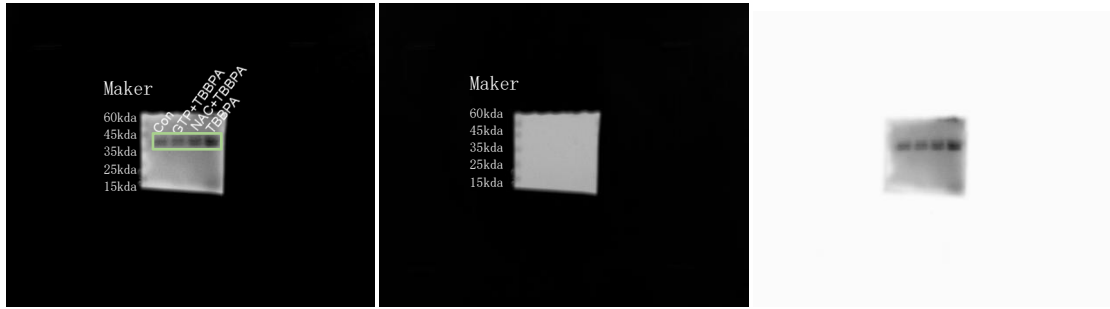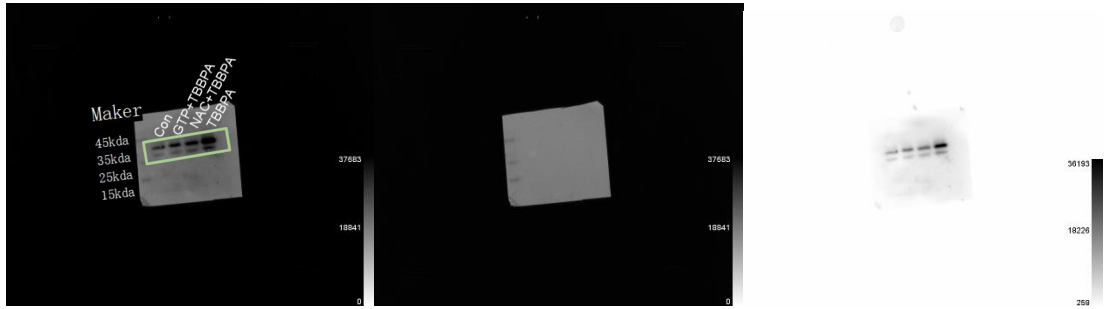

P-NF-KB 65kda

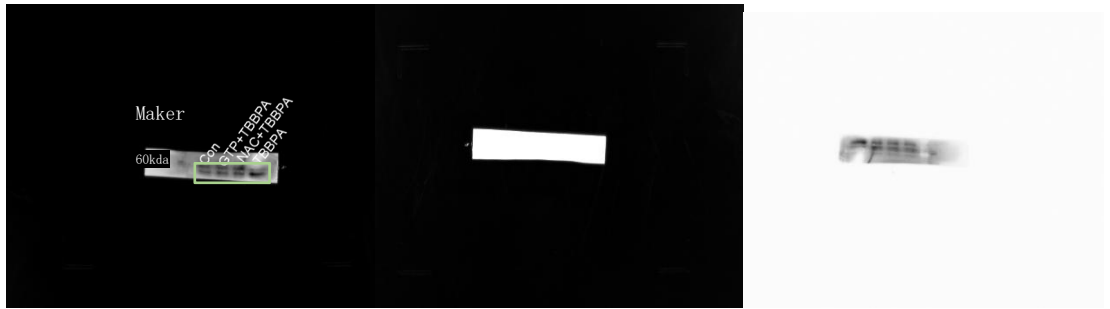

Xbp-1 45-50kda

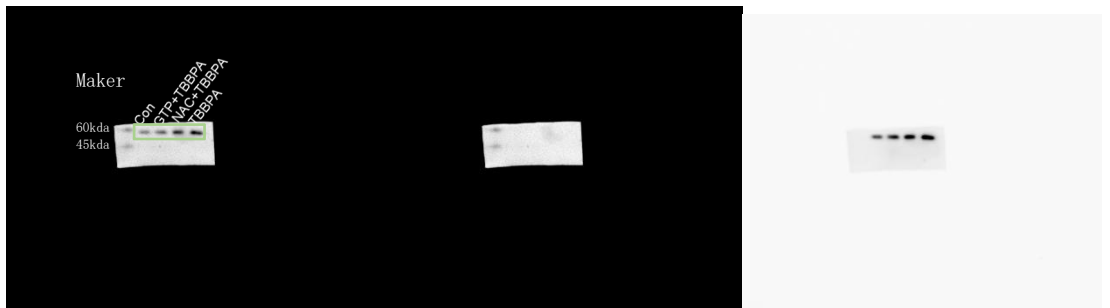

GAPDH 36kda

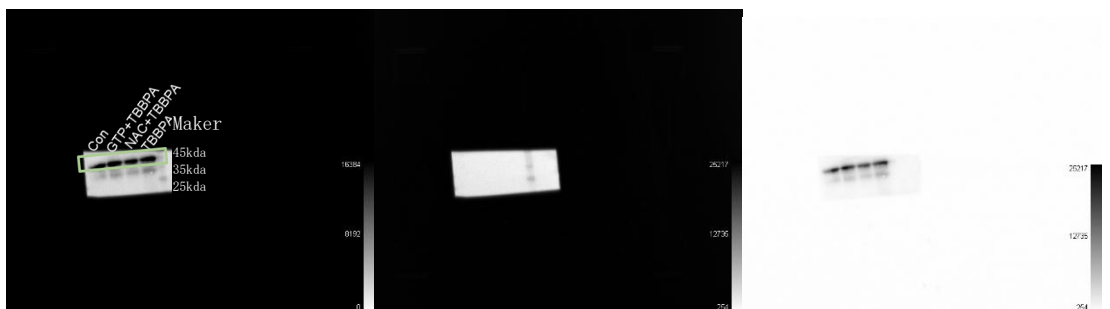

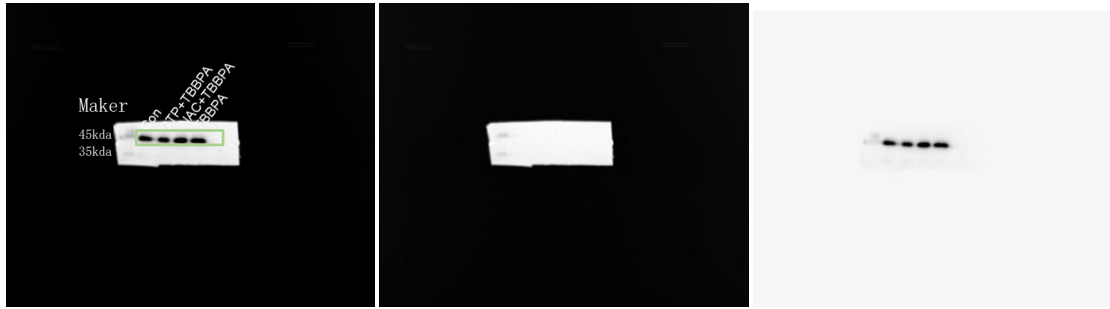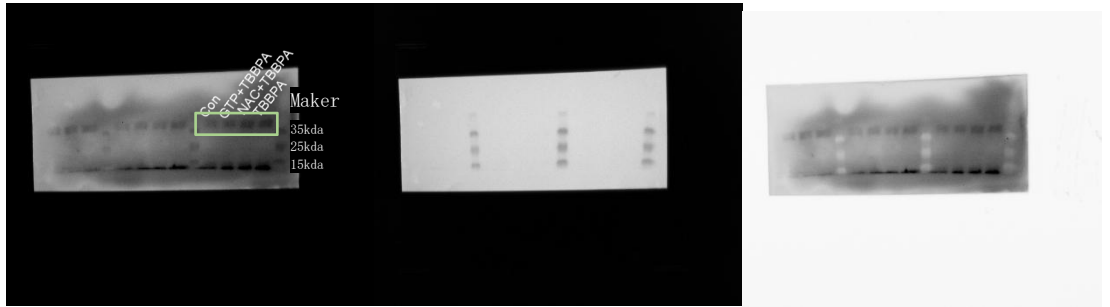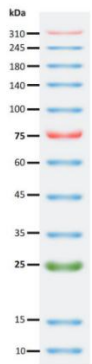

IRE-1 110kda(use M5 SuperRange Prestained Protein Ladder (10-310 kDa of Mei5bio))

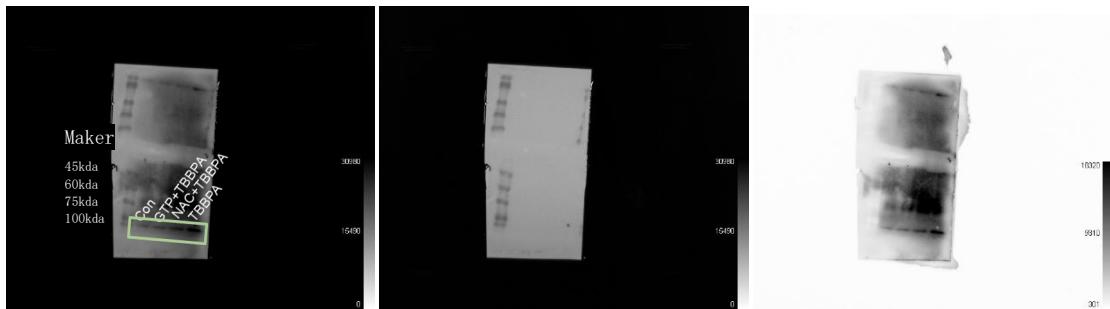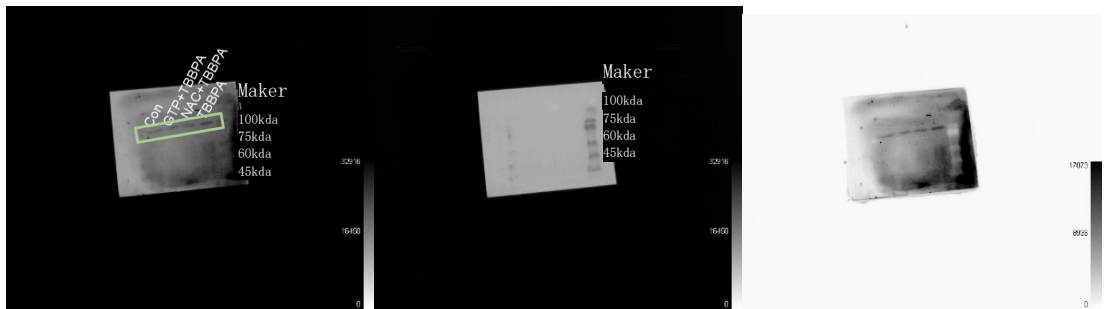

PERK 125kda

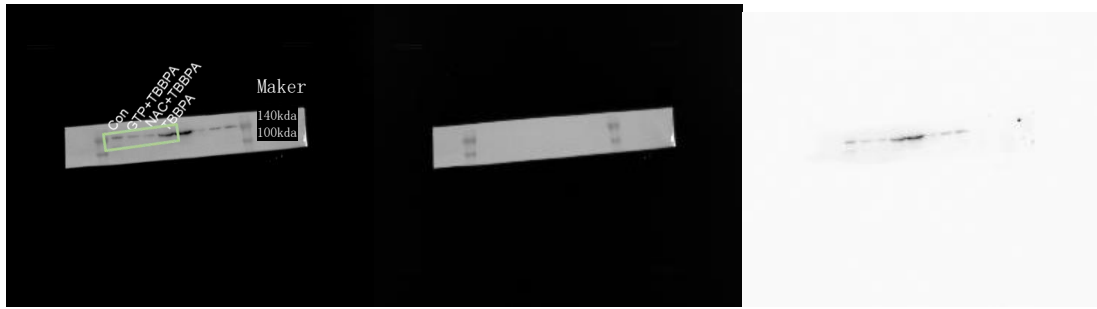

|          |     |           |           |           |     |           |    |
|----------|-----|-----------|-----------|-----------|-----|-----------|----|
| cell GSH |     |           |           |           |     |           |    |
|          | t   | 0.067     | 0.066     | 0.065     | t   | 0.068     |    |
|          | c   | 0.073     | 0.072     | 0.072     | c   | 0.073     |    |
|          | cha | 0.072     | 0.071     | 0.072     | t+n | 0.071     |    |
|          | t+c | 0.069     | 0.07      | 0.068     | t+c | 0.07      |    |
|          |     |           |           |           |     |           |    |
|          |     |           |           |           |     |           |    |
|          | t   | 6         | 4         | 2         | t   | 8         |    |
|          | c   | 24        | 20        | 20        | c   | 24        |    |
|          | cha | 18.461538 | 16.923077 | 18.461538 | t+n | 16.923077 |    |
|          | t+c | 10        | 12        | 8         | t+c | 12        |    |
|          |     |           |           |           |     |           |    |
|          |     | 8         | 8         | 10        |     | 8         |    |
|          |     | 24        | 20        | 20        |     | 24        |    |
|          |     | 11.428571 | 10.47619  | 11.428571 |     | 16.923077 |    |
|          |     | 10        | 12        | 8         |     | 12        |    |
|          |     |           |           |           |     |           |    |
|          |     | 8         | 24        | 11.428571 | 10  | t         | c  |
|          |     | 8         | 20        | 10.47619  | 12  | 8         | 24 |
|          |     | 10        | 20        | 11.428571 | 8   | 8         | 24 |
|          |     |           |           | 8         |     | 16        |    |

|            |           |           |           |           |           |  |
|------------|-----------|-----------|-----------|-----------|-----------|--|
| cell T-SOD |           | t         | c         | cha       | t+c       |  |
|            |           | 0.289     | 0.216     | 0.213     | 0.276     |  |
|            |           | 0.294     | 0.215     | 0.243     | 0.278     |  |
|            |           | 0.291     | 0.229     | 0.218     | 0.266     |  |
|            |           | 0.293     | 0.216     | 0.208     | 0.273     |  |
|            |           |           |           |           |           |  |
|            |           |           |           |           |           |  |
|            |           | 对照CON     |           |           |           |  |
|            |           | 0.36      |           |           |           |  |
|            |           | 0.383     |           |           |           |  |
|            |           | 0.364     |           |           |           |  |
|            |           | 0.369     |           |           |           |  |
|            |           |           |           |           |           |  |
|            |           | c         | t         | t+c       | cha       |  |
|            |           | 0.1972222 | 0.4       | 0.4083333 | 0.2333333 |  |
|            |           | 0.232376  | 0.4386423 | 0.3655352 | 0.2741514 |  |
|            |           | 0.2005495 | 0.3708791 | 0.4010989 | 0.2692308 |  |
|            |           | 0.2059621 | 0.4146341 | 0.4363144 | 0.2601626 |  |
|            |           |           |           |           |           |  |
|            |           |           |           |           |           |  |
|            | c         | t         | t+c       | cha       |           |  |
|            | 6.6069444 | 13.4      | 13.679167 | 7.8166667 |           |  |
|            | 7.7845953 | 14.694517 | 12.245431 | 9.1840731 |           |  |

|  |           |           |           |           |  |
|--|-----------|-----------|-----------|-----------|--|
|  | 6.7184066 | 12.424451 | 13.436813 | 9.0192308 |  |
|  | 6.899729  | 13.890244 | 14.616531 | 8.7154472 |  |
|  |           |           |           |           |  |
|  |           |           |           |           |  |
|  |           |           |           |           |  |
|  |           |           |           |           |  |
|  |           |           |           |           |  |
|  |           |           |           |           |  |
|  |           |           |           |           |  |
|  |           |           |           |           |  |
|  |           |           |           |           |  |

|          |        |           |           |           |           |       |
|----------|--------|-----------|-----------|-----------|-----------|-------|
| cell CAT |        | t+c       | t         | cha       | c         |       |
|          |        | 1         | 2         | 3         | 4         | 5     |
|          | A      |           |           |           |           |       |
|          | B      | 0.577     | 0.569     | 0.605     | 0.604     | 0.566 |
|          | C      | 0.575     | 0.569     | 0.598     | 0.602     | 0.564 |
|          | D      | 0.575     | 0.567     | 0.599     | 0.605     | 0.565 |
|          | E      | 0.579     | 0.568     | 0.616     | 0.618     | 0.564 |
|          | F      | 0.574     | 0.569     | 0.615     | 0.609     | 0.565 |
|          | G      |           |           |           |           |       |
|          | H      |           |           |           |           |       |
|          |        | t+c       | t         | cha       | c         |       |
|          |        | 0.4968333 | 0.1355    | 1.7615    | 1.7163333 |       |
|          |        | 0.4968333 | 0.2258333 | 1.5356667 | 1.7163333 |       |
|          |        | 0.4516667 | 0.0903333 | 1.5356667 | 1.8066667 |       |
|          |        | 0.6775    | 0.1806667 | 2.3486667 | 2.439     |       |
|          | 0.4065 | 0.1806667 | 2.2583333 | 1.9873333 |           |       |

|          |           |           |           |           |           |       |
|----------|-----------|-----------|-----------|-----------|-----------|-------|
| cell MDA |           | 1         | 2         | 3         | 4         | 5     |
|          | A         | 0.075     | 0.073     | 0.078     | 0.07      | 0.07  |
|          | B         | 0.068     | 0.07      | 0.069     | 0.075     | 0.072 |
|          | C         |           |           |           |           |       |
|          | D         |           |           |           |           |       |
|          | dz kb     | 0.046     | 0.046     | 0.043     | 0.194     | 0.19  |
|          | F         |           |           |           |           |       |
|          | G         |           |           |           |           |       |
|          | H         |           |           |           |           |       |
|          |           |           |           |           |           |       |
|          |           | CHA       | C         | C+t       | t         |       |
|          |           | 0.071     | 0.07      | 0.077     | 0.085     |       |
|          |           | 0.071     | 0.07      | 0.078     | 0.08      |       |
|          |           | 0.071     | 0.07      | 0.085     | 0.085     |       |
|          |           | 0.5118755 | 0.4914005 | 0.6347256 | 0.8428657 |       |
|          | 0.5260943 | 0.5050505 | 0.6734007 | 0.7154882 |           |       |

|  |           |           |           |           |  |
|--|-----------|-----------|-----------|-----------|--|
|  | 0.5509642 | 0.5312869 | 0.8264463 | 0.8264463 |  |
|--|-----------|-----------|-----------|-----------|--|

|   | 1              | 2              | 3              | 4              | 5              |
|---|----------------|----------------|----------------|----------------|----------------|
| A | 0.047<br>0.076 | 0.043<br>0.071 | 0.042<br>0.073 | 0.043<br>0.077 | 0.045<br>0.08  |
| B | 0.043<br>0.071 | 0.042<br>0.072 | 0.042<br>0.072 | 0.043<br>0.086 | 0.037<br>0.076 |
| C | 0.045<br>0.077 | 0.042<br>0.074 | 0.042<br>0.073 | 0.042<br>0.074 | 0.041<br>0.073 |
| D | 0.043<br>0.073 | 0.042<br>0.075 | 0.043<br>0.075 | 0.042<br>0.072 | 0.041<br>0.072 |
| E | 0.042<br>0.065 | 0.042<br>0.075 | 0.051<br>0.073 | 0.058<br>0.083 | 0.054<br>0.076 |
| F | 0.043<br>0.067 | 0.039<br>0.073 | 0.05<br>0.073  | 0.048<br>0.076 | 0.051<br>0.072 |
| G | 0.04<br>0.06   | 0.053<br>0.088 | 0.048<br>0.07  | 0.043<br>0.07  | 0.053<br>0.073 |
| H | 0.042<br>0.063 | 0.039<br>0.07  | 0.042<br>0.065 | 0.045<br>0.071 | 0.054<br>0.074 |

cell T-AOC

| t     | cha    | c      | c+t    |
|-------|--------|--------|--------|
| 0.051 | 0.0531 | 0.064  | 0.0561 |
| 0.051 | 0.053  | 0.0653 | 0.0551 |
| 0.053 | 0.054  | 0.055  | 0.062  |
| 0.051 | 0.0532 | 0.055  | 0.065  |

对照

|       |
|-------|
| 0.048 |
| 0.048 |
| 0.046 |
| 0.047 |

| t         | cha       | c         | c+t       |
|-----------|-----------|-----------|-----------|
| 0.37      | 0.629     | 1.9733333 | 0.999     |
| 0.37      | 0.6166667 | 2.1336667 | 0.8756667 |
| 0.8633333 | 0.9866667 | 1.11      | 1.9733333 |
| 0.4933333 | 0.7646667 | 0.9866667 | 2.22      |

|           |       |  |       |       |       |  |  |
|-----------|-------|--|-------|-------|-------|--|--|
|           |       |  | 空白    | 标准    |       |  |  |
| 0.068     | 0.068 |  | 0.064 | 0.074 | 0.01  |  |  |
| 0.073     | 0.071 |  | 0.067 | 0.072 | 0.005 |  |  |
| 0.073     | 0.073 |  | 0.06  | 0.073 | 0.013 |  |  |
| 0.069     | 0.069 |  | 0.064 | 0.074 | 0.01  |  |  |
|           |       |  |       |       |       |  |  |
|           |       |  |       |       |       |  |  |
| 8         | 8     |  |       |       |       |  |  |
| 24        | 16    |  |       |       |       |  |  |
| 20        | 20    |  |       |       |       |  |  |
| 10        | 10    |  |       |       |       |  |  |
|           |       |  |       |       |       |  |  |
| 8         | 8     |  |       |       |       |  |  |
| 24        | 16    |  |       |       |       |  |  |
| 20        | 20    |  |       |       |       |  |  |
| 10        | 10    |  |       |       |       |  |  |
|           |       |  |       |       |       |  |  |
| t+n       | t+c   |  |       |       |       |  |  |
| 16.923077 | 12    |  |       |       |       |  |  |
| 20        | 10    |  |       |       |       |  |  |
| 20        | 10    |  |       |       |       |  |  |
|           |       |  |       |       |       |  |  |
|           |       |  |       |       |       |  |  |

|     |           |           |           |  |  |  |  |
|-----|-----------|-----------|-----------|--|--|--|--|
|     |           |           |           |  |  |  |  |
| t   | 0.274     | 0.268     | 0.271     |  |  |  |  |
| c   | 0.252     | 0.251     | 0.254     |  |  |  |  |
| t+n | 0.242     | 0.264     | 0.248     |  |  |  |  |
| t+c | 0.261     | 0.259     | 0.264     |  |  |  |  |
|     |           |           |           |  |  |  |  |
|     |           |           |           |  |  |  |  |
|     |           |           |           |  |  |  |  |
| t   | 0.2388889 | 0.2555556 | 0.2472222 |  |  |  |  |
| c   | 0.3420366 | 0.3446475 | 0.3368146 |  |  |  |  |
| t+n | 0.3351648 | 0.2747253 | 0.3186813 |  |  |  |  |
| t+c | 0.2926829 | 0.298103  | 0.2845528 |  |  |  |  |
|     |           |           |           |  |  |  |  |
|     |           |           |           |  |  |  |  |
| t   | 8.0027778 | 8.5611111 | 8.2819444 |  |  |  |  |
| c   | 11.458225 | 11.545692 | 11.28329  |  |  |  |  |
| t+n | 11.228022 | 9.2032967 | 10.675824 |  |  |  |  |
| t+c | 9.804878  | 9.9864499 | 9.5325203 |  |  |  |  |
|     |           |           |           |  |  |  |  |
|     |           |           |           |  |  |  |  |



|           |           |           |           |  |  |  |  |
|-----------|-----------|-----------|-----------|--|--|--|--|
| c         | 8.9333333 | 9.3986111 | 9.3986111 |  |  |  |  |
| t         | 11.458225 | 11.545692 | 11.28329  |  |  |  |  |
| t+c       | 11.228022 | 9.2032967 | 10.675824 |  |  |  |  |
| t+n       | 9.804878  | 9.9864499 | 9.5325203 |  |  |  |  |
|           |           |           |           |  |  |  |  |
| c         | t         | t+c       | t+n       |  |  |  |  |
| 8.9333333 | 11.458225 | 11.228022 | 9.804878  |  |  |  |  |
| 9.3986111 | 11.545692 | 9.2032967 | 9.9864499 |  |  |  |  |
| 9.3986111 | 11.28329  | 10.675824 | 9.5325203 |  |  |  |  |
|           |           |           |           |  |  |  |  |

|           |           |           |           |       |  |  |  |
|-----------|-----------|-----------|-----------|-------|--|--|--|
| C         | T+C       | T+N       | T         |       |  |  |  |
| 6         | 7         | 8         | 9         | 10    |  |  |  |
|           |           |           |           |       |  |  |  |
| 0.625     | 0.638     | 0.627     | 0.649     | 0.618 |  |  |  |
| 0.621     | 0.636     | 0.624     | 0.642     | 0.618 |  |  |  |
| 0.622     | 0.637     | 0.626     | 0.645     | 0.616 |  |  |  |
| 0.623     | 0.629     | 0.63      | 0.644     | 0.61  |  |  |  |
| 0.621     | 0.629     | 0.634     | 0.649     | 0.614 |  |  |  |
|           |           |           |           |       |  |  |  |
|           |           |           |           |       |  |  |  |
| C         | T+C       | T+N       | T         |       |  |  |  |
| 0.3161667 | 0.9033333 | 0.4065    | 1.4001667 |       |  |  |  |
| 0.1355    | 0.813     | 0.271     | 1.084     |       |  |  |  |
| 0.271     | 0.9485    | 0.4516667 | 1.3098333 |       |  |  |  |
| 0.5871667 | 0.8581667 | 0.9033333 | 1.5356667 |       |  |  |  |
| 0.3161667 | 0.6775    | 0.9033333 | 1.5808333 |       |  |  |  |

|           |           |           |           |       |       |       |     |
|-----------|-----------|-----------|-----------|-------|-------|-------|-----|
|           |           |           |           |       |       |       |     |
| 6         | 7         | 8         | 9         | 10    | 11    | 12    |     |
| 0.07      | 0.077     | 0.078     | 0.085     | 0.085 | 0.08  | 0.085 | 532 |
| 0.077     | 0.077     | 0.076     | 0.074     | 0.067 | 0.064 | 0.067 | 532 |
|           |           |           |           |       |       |       | 532 |
|           |           |           |           |       |       |       | 532 |
| 0.197     | 0.04      | 0.043     | 0.041     | 0.189 | 0.192 | 0.195 | 532 |
|           |           |           |           |       |       |       | 532 |
|           |           |           |           |       |       |       | 532 |
|           |           |           |           |       |       |       | 532 |
|           |           |           |           |       |       |       |     |
| C         | T         |           |           |       |       |       |     |
| 0.068     | 0.075     | 0.071     | 0.071     |       |       |       |     |
| 0.07      | 0.077     | 0.071     | 0.072     |       |       |       |     |
| 0.069     | 0.077     | 0.072     | 0.073     |       |       |       |     |
| 0.5694529 | 0.7118161 | 0.6304657 | 0.6304657 |       |       |       |     |
| 0.5491153 | 0.6914785 | 0.5694529 | 0.5897905 |       |       |       |     |

|           |           |           |           |  |  |  |  |
|-----------|-----------|-----------|-----------|--|--|--|--|
| 0.5509642 | 0.7083825 | 0.6099961 | 0.6296734 |  |  |  |  |
|-----------|-----------|-----------|-----------|--|--|--|--|

| 6     | 7     | 8     | 9     | 10    | 11    | 12    |
|-------|-------|-------|-------|-------|-------|-------|
| 0.06  | 0.044 | 0.044 | 0.043 | 0.043 | 0.043 | 0.045 |
| 0.096 | 0.078 | 0.079 | 0.078 | 0.075 | 0.074 | 0.076 |
| 0.049 | 0.042 | 0.042 | 0.042 | 0.041 | 0.04  | 0.043 |
| 0.092 | 0.075 | 0.076 | 0.075 | 0.069 | 0.068 | 0.07  |
| 0.04  | 0.041 | 0.04  | 0.039 | 0.041 | 0.04  | 0.042 |
| 0.073 | 0.068 | 0.067 | 0.065 | 0.072 | 0.072 | 0.073 |
| 0.04  | 0.04  | 0.043 | 0.042 | 0.046 | 0.041 | 0.044 |
| 0.073 | 0.068 | 0.071 | 0.068 | 0.074 | 0.069 | 0.072 |
| 0.053 | 0.064 | 0.054 | 0.055 | 0.054 | 0.073 | 0.06  |
| 0.074 | 0.07  | 0.076 | 0.075 | 0.074 | 0.081 | 0.079 |
| 0.054 | 0.073 | 0.053 | 0.058 | 0.056 | 0.08  | 0.063 |
| 0.075 | 0.08  | 0.076 | 0.081 | 0.078 | 0.099 | 0.083 |
| 0.053 | 0.075 | 0.052 | 0.056 | 0.055 | 0.073 | 0.061 |
| 0.073 | 0.081 | 0.074 | 0.077 | 0.077 | 0.08  | 0.078 |
| 0.056 | 0.075 | 0.057 | 0.055 | 0.054 | 0.074 | 0.065 |
| 0.076 | 0.081 | 0.079 | 0.076 | 0.075 | 0.08  | 0.085 |

| t+c   | t     | c     | t+n   |
|-------|-------|-------|-------|
| 0.057 | 0.054 | 0.073 | 0.073 |
| 0.058 | 0.056 | 0.08  | 0.079 |
| 0.056 | 0.055 | 0.073 | 0.073 |
| 0.055 | 0.054 | 0.074 | 0.072 |

| t+c       | t         | c         | t+n       |
|-----------|-----------|-----------|-----------|
| 1.11      | 0.74      | 3.0833333 | 3.0833333 |
| 1.2333333 | 0.9866667 | 3.9466667 | 3.8233333 |
| 1.2333333 | 1.11      | 3.33      | 3.33      |
| 0.9866667 | 0.8633333 | 3.33      | 3.0833333 |

|   | 1     | 2     | 3     | 4     | 5     |
|---|-------|-------|-------|-------|-------|
| A | 0.11  | 0.126 | 0.105 | 0.106 | 0.113 |
| B | 0.226 | 0.146 | 0.137 | 0.213 | 0.22  |
| C | 0.137 | 0.111 | 0.106 | 0.124 | 0.12  |
| D | 0.21  | 0.233 | 0.212 | 0.235 | 0.231 |
| E | 0.103 | 0.105 | 0.109 | 0.185 | 0.145 |
| F | 0.219 | 0.2   | 0.201 | 0.203 | 0.188 |
| G | 0.265 | 0.24  | 0.141 | 0.238 | 0.302 |
| H | 0     | 0     | 0     | 0     | 0     |

IL-6

| tissue | Y值 | OD值   | X值浓度      | 胃cell | Y值     | X值        |
|--------|----|-------|-----------|-------|--------|-----------|
|        |    | 0.11  | 11.509721 |       | 0.126  | 15.0022   |
|        |    | 0.126 | 15.0022   |       | 0.126  | 15.0022   |
| C      |    | 0.105 | 10.418321 |       | 0.123  | 14.34736  |
|        |    | 0.106 | 10.636601 |       | 0.119  | 13.474241 |
|        |    | 0.113 | 12.164561 |       | 0.120  | 13.692521 |
| GTP    |    | 0.114 | 12.382841 |       | 0.129  | 15.65704  |
|        |    | 0.111 | 11.728001 |       | 0.13   | 15.87532  |
|        |    | 0.113 | 12.164561 |       | 0.2    | 31.154918 |
| T+C    |    | 0.101 | 9.545201  |       | 0.1812 | 27.051255 |
|        |    | 0.128 | 15.43876  |       | 0.213  | 33.992558 |
|        |    | 0.102 | 9.763481  |       | 0.22   | 35.520518 |
| T      |    | 0.124 | 14.56564  |       | 0.212  | 33.774278 |

IL-1 $\beta$

|   | 1     | 2     | 3     | 4     | 5     |
|---|-------|-------|-------|-------|-------|
| A | 0.121 | 0.128 | 0.121 | 0.142 | 0.112 |
| B | 0.202 | 0.153 | 0.134 | 0.164 | 0.186 |
| C | 0.127 | 0.14  | 0.115 | 0.114 | 0.112 |
| D | 0.131 | 0.149 | 0.143 | 0.119 | 0.124 |
| E | 0.119 | 0.105 | 0.106 | 0.095 | 0.119 |
| F | 0.179 | 0.166 | 0.159 | 0.139 | 0.146 |
| G | 0.268 | 0.216 | 0.234 | 0.173 | 0.192 |
| H | 0     | 0     | 0     | 0     | 0     |

| tissue | Y值 | X值浓度  | 胃cell     | Y值 | X值    |           |
|--------|----|-------|-----------|----|-------|-----------|
|        |    | 0.116 | 11.795653 |    | 0.135 | 14.996377 |
|        |    | 0.112 | 11.121816 |    | 0.099 | 8.931846  |
| C      |    | 0.112 | 11.121816 |    | 0.086 | 6.741877  |
|        |    | 0.111 | 10.953357 |    | 0.124 | 13.143326 |
|        |    | 0.117 | 11.964112 |    | 0.1   | 9.100306  |
| GTP    |    | 0.119 | 12.30103  |    | 0.134 | 14.827918 |

|     |       |           |       |           |
|-----|-------|-----------|-------|-----------|
|     | 0.122 | 12.806408 | 0.156 | 18.53402  |
|     | 0.125 | 13.311785 | 0.152 | 17.860183 |
| T+C | 0.121 | 12.637949 | 0.159 | 19.039398 |
|     | 0.135 | 14.996377 | 0.202 | 26.283143 |
|     | 0.142 | 16.175592 | 0.203 | 26.451602 |
| T   | 0.138 | 15.501755 | 0.202 | 26.283143 |

|   | 1     | 2     | 3     | 4     | 5     |
|---|-------|-------|-------|-------|-------|
| A | 0.105 | 0.098 | 0.107 | 0.153 | 0.116 |
| B | 0.096 | 0.103 | 0.105 | 0.194 | 0.192 |
| C | 0.107 | 0.1   | 0.123 | 0.117 | 0.121 |
| D | 0.171 | 0.146 | 0.144 | 0.151 | 0.153 |
| E | 0.107 | 0.103 | 0.105 | 0.111 | 0.081 |
| F | 0.171 | 0.165 | 0.226 | 0.176 | 0.162 |
| G | 0.196 | 0.188 | 0.217 | 0.202 | 0.207 |
| H | 0     | 0     | 0     | 0     | 0     |

| TNF- $\alpha$ | tissue | Y值    | X值         | 胃cell | Y值    | X值         |
|---------------|--------|-------|------------|-------|-------|------------|
|               |        | 0.095 | 109.025644 |       | 0.064 | 76.811554  |
|               |        | 0.098 | 112.143136 |       | 0.086 | 99.673166  |
|               | C      | 0.095 | 109.025644 |       | 0.081 | 94.477345  |
|               |        | 0.098 | 112.143136 |       | 0.086 | 99.673166  |
|               |        | 0.102 | 116.299793 |       | 0.072 | 85.124867  |
|               | GTP    | 0.101 | 115.260629 |       | 0.081 | 94.477345  |
|               |        | 0.107 | 121.495614 |       | 0.103 | 117.338957 |
|               |        | 0.105 | 119.417286 |       | 0.105 | 119.417286 |
|               | T+C    | 0.116 | 130.848092 |       | 0.107 | 121.495614 |
|               |        | 0.127 | 142.278898 |       | 0.194 | 211.9029   |
|               |        | 0.131 | 146.435555 |       | 0.192 | 209.824571 |
|               | T      | 0.153 | 169.297167 |       | 0.195 | 212.942064 |



cell

|          | 1     | 2     | 3     | 4     | 5     | 6     |
|----------|-------|-------|-------|-------|-------|-------|
| TNFa yj  | 0.235 | 0.238 | 0.219 | 0.226 | 0.266 | 0.292 |
| TNFa lhl | 0.326 | 0.269 | 0.262 | 0.32  | 0.31  | 0.355 |
| C        | 0     | 0     | 0     | 0     | 0     | 0     |
| D        | 0     | 0     | 0     | 0     | 0     | 0     |
| il-8 lhl | 0.317 | 0.346 | 0.347 | eill  | 0.382 | 0.352 |
| F        | 0     | 0     | 0     | 0     | 0     | 0     |
| il1-B yj | 0.315 | 0.24  | 0.276 | 0.339 | 0.253 | 0.322 |
| H        | 0     | 0     | 0     | 0     | 0     | 0     |

|     | TNFa yj |           | IL-1 $\beta$ |           | IL-6  | X值浓度      |           |
|-----|---------|-----------|--------------|-----------|-------|-----------|-----------|
|     | 0.215   | 233.72535 | 0.253        | 34.874561 | 0.107 | 10.854881 |           |
|     | 0.218   | 236.84284 | 0.24         | 32.684592 | 0.124 | 14.56564  |           |
| C   | 0.219   | 237.88201 | 0.285        | 40.265255 | 0.139 | 17.83984  | C         |
|     | 0.25    | 270.0961  | 0.339        | 49.362051 | 0.144 | 18.93124  |           |
|     | 0.263   | 283.60523 | 0.315        | 45.319031 | 0.142 | 18.49468  |           |
| C+T | 0.254   | 274.25275 | 0.322        | 46.498245 | 0.147 | 19.586083 | TTP+TBBPA |
|     | 0.239   | 258.66529 | 0.267        | 37.23299  | 0.125 | 14.78392  |           |
|     | 0.224   | 243.07783 | 0.283        | 39.928337 | 0.128 | 15.43876  |           |
| N+T | 0.222   | 240.9995  | 0.276        | 38.749123 | 0.113 | 12.164561 | NAC+TBBPA |
|     | 0.296   | 317.89765 | 0.375        | 55.426582 | 0.23  | 37.703317 |           |
|     | 0.266   | 286.72272 | 0.401        | 59.806521 | 0.221 | 35.738798 |           |
| T   | 0.262   | 282.56607 | 0.413        | 61.828031 | 0.19  | 28.972118 | TBBPA     |

| 6     | 7     | 8     | 9     | 10    | 11    | 12    |
|-------|-------|-------|-------|-------|-------|-------|
| 0.114 | 0.128 | 0.102 | 0.124 | 0.111 | 0.113 | 0.101 |
| 0.212 | 0.061 | 0.068 | 0.064 | 0.063 | 0.063 | 0.065 |
| 0.124 | 0.136 | 0.128 | 0.09  | 0.145 | 0.096 | 0.105 |
| 0.245 | 0.193 | 0.212 | 0.236 | 0.225 | 0.224 | 0.227 |
| 0.121 | 0.1   | 0.111 | 0.103 | 0.102 | 0.093 | 0.094 |
| 0.205 | 0.217 | 0.22  | 0.227 | 0.145 | 0.131 | 0.098 |
| 0.212 | 0.181 | 0.144 | 0.155 | 0.151 | 0.152 | 0.168 |
| 0     | 0     | 0     | 0     | 0     | 0     | 0     |

| 6     | 7     | 8     | 9     | 10    | 11    | 12    |
|-------|-------|-------|-------|-------|-------|-------|
| 0.119 | 0.122 | 0.125 | 0.116 | 0.135 | 0.112 | 0.127 |
| 0.192 | 0.202 | 0.203 | 0.189 | 0.1   | 0.099 | 0.086 |
| 0.125 | 0.122 | 0.119 | 0.116 | 0.117 | 0.116 | 0.118 |
| 0.137 | 0.122 | 0.139 | 0.147 | 0.157 | 0.161 | 0.163 |
| 0.113 | 0.119 | 0.104 | 0.107 | 0.107 | 0.109 | 0.118 |
| 0.141 | 0.164 | 0.169 | 0.17  | 0.096 | 0.138 | 0.134 |
| 0.175 | 0.189 | 0.249 | 0.227 | 0.205 | 0.193 | 0.224 |
| 0     | 0     | 0     | 0     | 0     | 0     | 0     |







| 7     | 8     | 9     | 10    | 11    | 12    |
|-------|-------|-------|-------|-------|-------|
| 0.254 | 0.276 | 0.293 | 0.25  | 0.222 | 0.239 |
| 0.376 | 0.347 | 0.381 | 0.319 | 0.278 | 0.235 |
| 0     | 0     | 0     | 0     | 0     | 0     |
| 0     | 0     | 0     | 0     | 0     | 0     |
| 0.378 | 0.394 | 0.353 | 0.371 | 0.448 | 0.355 |
| 0     | 0     | 0     | 0     | 0     | 0     |
| 0.283 | 0.413 | 0.285 | 0.267 | 0.401 | 0.375 |
| 0     | 0     | 0     | 0     | 0     | 0     |

| 孔位  | 通道  | CT值   | TM值  | 类型   | 目的基因           | 样本名称  |          |
|-----|-----|-------|------|------|----------------|-------|----------|
| A01 | FAM | 32.91 |      | 0 未知 | PERK           | 19.01 | 1        |
| A02 | FAM | 32.71 |      | 0 未知 |                | 19.22 | 1        |
| A03 | FAM | 33.09 |      | 0 未知 |                | 19.11 | 1        |
| A04 | FAM | 33.11 |      | 0 未知 |                | 19.47 | 0.835088 |
| A05 | FAM | 32.72 |      | 0 未知 |                | 19.3  | 0.952638 |
| A06 | FAM | 31.85 | 85.5 | 未知   |                | 16.14 | 3.317278 |
| A07 | FAM | 36.12 |      | 0 未知 |                | 17.1  | 34.77552 |
| A08 | FAM | 38.43 |      | 0 未知 |                | 19.56 | 41.64294 |
| A09 | FAM | 38.4  |      | 0 未知 |                | 19.38 | 32.89964 |
| A10 | FAM | 38.38 |      | 0 未知 |                | 18.73 | 53.81737 |
| A11 | FAM | 38.1  | 85.5 | 未知   |                | 18.54 | 67.18187 |
| A12 | FAM | 38.02 | 85.5 | 未知   |                | 18.56 | 44.6318  |
| B01 | FAM | 19.01 | 82   | 未知   | GAPDH          | 19.01 | 1        |
| B02 | FAM | 19.22 | 82   | 未知   |                | 19.22 | 1        |
| B03 | FAM | 19.11 | 82   | 未知   |                | 19.11 | 1        |
| B04 | FAM | 19.47 | 82   | 未知   |                | 19.47 | 1        |
| B05 | FAM | 19.3  | 82   | 未知   |                | 19.3  | 1        |
| B06 | FAM | 16.14 | 82   | 未知   |                | 16.14 | 1        |
| B07 | FAM | 17.1  | 82   | 未知   |                | 17.1  | 1        |
| B08 | FAM | 19.56 | 82   | 未知   |                | 19.56 | 1        |
| B09 | FAM | 19.38 | 82   | 未知   |                | 19.38 | 1        |
| B10 | FAM | 18.73 | 81.5 | 未知   |                | 18.73 | 1        |
| B11 | FAM | 18.54 | 81.5 | 未知   |                | 18.54 | 1        |
| B12 | FAM | 18.56 | 81.5 | 未知   |                | 18.56 | 1        |
| C01 | FAM | 28.74 | 0    | 未知   | EIF-2 $\alpha$ | 19.01 | 1        |
| C02 | FAM | 28.64 | 0    | 未知   |                | 19.22 | 1        |
| C03 | FAM | 28.27 | 84   | 未知   |                | 19.11 | 1        |
| C04 | FAM | 29.13 | 83.5 | 未知   |                | 18.47 | 1.905276 |
| C05 | FAM | 30.02 | 83.5 | 未知   |                | 18.3  | 4.924578 |
| C06 | FAM | 27.75 | 83.5 | 未知   |                | 16.14 | 5.464161 |
| C07 | FAM | 31.86 | 83.5 | 未知   |                | 17.1  | 32.67239 |
| C08 | FAM | 29.17 | 82.5 | 未知   |                | 19.56 | 1.140764 |
| C09 | FAM | 31.31 | 83   | 未知   |                | 18.38 | 13.64216 |
| C10 | FAM | 33.12 | 82   | 未知   |                | 18.73 | 25.28132 |
| C11 | FAM | 34.31 | 82   | 未知   |                | 18.54 | 81.57188 |
| C12 | FAM | 33.21 | 81.5 | 未知   |                | 18.56 | 44.94224 |
| D01 | FAM | 30.03 | 0    | 未知   | ATF-4          | 19.01 | 1        |
| D02 | FAM | 30.2  | 0    | 未知   |                | 19.22 | 1        |
| D03 | FAM | 30.21 | 0    | 未知   |                | 19.11 | 1        |
| D04 | FAM | 30.12 | 84   | 未知   |                | 19.47 | 0.773782 |
| D05 | FAM | 30.3  | 84   | 未知   |                | 19.3  | 1.013959 |
| D06 | FAM | 30.44 | 84   | 未知   |                | 19.34 | 1        |
| D07 | FAM | 31.05 | 84   | 未知   |                | 19.4  | 1.547565 |
| D08 | FAM | 31.42 | 84.5 | 未知   |                | 19.56 | 1.840375 |
| D09 | FAM | 32.21 | 84   | 未知   |                | 19.38 | 3.317278 |
| D10 | FAM | 31.36 | 84   | 未知   |                | 18.73 | 3.052518 |
| D11 | FAM | 32.06 | 84   | 未知   |                | 18.54 | 5.81589  |
| D12 | FAM | 31.26 | 84   | 未知   |                | 18.56 | 3.031433 |
| E01 | FAM | 30.31 | 82.5 | 未知   | IRE-1          | 18.41 | 1        |
| E02 | FAM | 31.29 | 82.5 | 未知   |                | 18.11 | 1        |
| E03 | FAM | 30.4  | 82.5 | 未知   |                | 18.71 | 1        |
| E04 | FAM | 31.48 | 82.5 | 未知   |                | 18.63 | 1.931873 |
| E05 | FAM | 32.12 | 82.5 | 未知   |                | 18.68 | 1.197479 |
| E06 | FAM | 30.93 | 82.5 | 未知   |                | 18.68 | 1.474269 |
| E07 | FAM | 32.95 | 0    | 未知   |                | 19.15 | 3.732132 |
| E08 | FAM | 32.9  | 0    | 未知   |                | 19.14 | 1.494849 |
| E09 | FAM | 32.95 | 81.5 | 未知   |                | 18.99 | 4.823231 |

| 孔位  | 通道  | CT值   | TM值  | 类型 | 目的基因          | 内参             |
|-----|-----|-------|------|----|---------------|----------------|
| E10 | FAM | 34.39 | 82.5 | 未知 |               | 18.06 21.55574 |
| E11 | FAM | 35.62 | 82.5 | 未知 |               | 18.3 17.63048  |
| E12 | FAM | 35.05 | 82.5 | 未知 |               | 18.31 33.12848 |
| F01 | FAM | 33.9  | 0    | 未知 | Xbp-1         | 18.41 1        |
| F02 | FAM | 33.67 | 76   | 未知 |               | 18.11 1        |
| F03 | FAM | 33.72 | 76.5 | 未知 |               | 18.71 1        |
| F04 | FAM | 34.23 | 84   | 未知 |               | 18.63 1.079228 |
| F05 | FAM | 33.87 | 83.5 | 未知 |               | 18.68 0.773782 |
| F06 | FAM | 33.39 | 81.5 | 未知 |               | 18.68 0.812252 |
| F07 | FAM | 34.56 | 77.5 | 未知 |               | 19.15 0.946058 |
| F08 | FAM | 34.52 | 84   | 未知 |               | 19.14 0.882703 |
| F09 | FAM | 34.54 | 77.5 | 未知 |               | 18.99 1.453973 |
| F10 | FAM | 35.27 | 76   | 未知 |               | 18.06 3.294364 |
| F11 | FAM | 35.13 | 76   | 未知 |               | 18.3 2.411616  |
| F12 | FAM | 35.22 | 0    | 未知 |               | 18.31 3.732132 |
| A01 | FAM | 22.85 | 66   | 未知 | Caspase-7     | 19.01 1        |
| A02 | FAM | 22.56 | 66.5 | 未知 |               | 19.22 1        |
| A03 | FAM | 22.44 | 66.5 | 未知 |               | 19.11 1        |
| A04 | FAM | 22.64 | 66.5 | 未知 |               | 19.47 0.628507 |
| A05 | FAM | 22.53 | 66.5 | 未知 |               | 19.3 0.926588  |
| A06 | FAM | 22.54 | 66.5 | 未知 |               | 19.14 1.049717 |
| A07 | FAM | 23.54 | 66.5 | 未知 |               | 19.81 0.926588 |
| A08 | FAM | 23.79 | 66.5 | 未知 |               | 19.56 1.853176 |
| A09 | FAM | 23.3  | 66.5 | 未知 |               | 19.38 1.505247 |
| A10 | FAM | 26.71 | 66   | 未知 |               | 18.73 17.63048 |
| A11 | FAM | 25.86 | 65.5 | 未知 |               | 18.54 15.77972 |
| A12 | FAM | 26.36 | 81.5 | 未知 |               | 18.56 22.16175 |
| B01 | FAM | 20.57 | 85   | 未知 | NF-KB         | 19.01 1        |
| B02 | FAM | 21.51 | 85   | 未知 |               | 19.22 1        |
| B03 | FAM | 21.88 | 85   | 未知 |               | 19.11 1        |
| B04 | FAM | 21.02 | 85   | 未知 |               | 19.47 0.993092 |
| B05 | FAM | 21.31 | 85   | 未知 |               | 19.3 0.823591  |
| B06 | FAM | 21.09 | 85   | 未知 |               | 19.14 0.566442 |
| B07 | FAM | 22.82 | 85   | 未知 |               | 19.81 2.732081 |
| B08 | FAM | 23.39 | 85   | 未知 |               | 19.56 2.907945 |
| B09 | FAM | 23.44 | 85   | 未知 |               | 19.38 2.445281 |
| B10 | FAM | 25.95 | 84.5 | 未知 |               | 18.73 50.56264 |
| B11 | FAM | 26.76 | 84.5 | 未知 |               | 18.54 60.96883 |
| B12 | FAM | 25.74 | 84.5 | 未知 |               | 18.56 21.25897 |
| C01 | FAM | 28.42 | 85   | 未知 | IKB- $\alpha$ | 19.01 1        |
| C02 | FAM | 29.23 | 67   | 未知 |               | 19.22 1        |
| C03 | FAM | 28.93 | 66.5 | 未知 |               | 19.11 1        |
| C04 | FAM | 28.82 | 66.5 | 未知 |               | 19.47 0.959264 |
| C05 | FAM | 28.93 | 66.5 | 未知 |               | 19.3 0.768438  |
| C06 | FAM | 29.03 | 66.5 | 未知 |               | 19.14 1.049717 |
| C07 | FAM | 27.48 | 66.5 | 未知 |               | 19.81 0.29937  |
| C08 | FAM | 27.59 | 66.5 | 未知 |               | 19.56 0.25349  |
| C09 | FAM | 27.99 | 66.5 | 未知 |               | 19.38 0.432269 |
| C10 | FAM | 23.48 | 78   | 未知 |               | 18.73 0.039555 |
| C11 | FAM | 25.59 | 0    | 未知 |               | 18.54 0.128514 |
| C12 | FAM | 23.99 | 0    | 未知 |               | 18.56 0.047696 |
| D01 | FAM | 25.11 | 65.5 | 未知 | IL-1 $\beta$  | 19.01 1        |
| D02 | FAM | 25.91 | 66   | 未知 |               | 19.22 1        |
| D03 | FAM | 25.9  | 66.5 | 未知 |               | 19.11 1        |
| D04 | FAM | 25.86 | 66.5 | 未知 |               | 19.47 1.22264  |
| D05 | FAM | 25.72 | 66.5 | 未知 |               | 19.3 0.82932   |
| D06 | FAM | 25.94 | 66.5 | 未知 |               | 19.14 1.006956 |

|     |     |       |      |    |       |       |          |
|-----|-----|-------|------|----|-------|-------|----------|
| D07 | FAM | 26.08 | 66.5 | 未知 |       | 19.81 | 1.125058 |
| D08 | FAM | 26.7  | 66   | 未知 |       | 19.56 | 1.36604  |
| D09 | FAM | 26.41 | 66   | 未知 |       | 19.38 | 1.180993 |
| D10 | FAM | 27    | 0    | 未知 |       | 18.73 | 4.500234 |
| D11 | FAM | 27.3  | 0    | 未知 |       | 18.54 | 4.198867 |
| D12 | FAM | 27.65 | 65.5 | 未知 |       | 18.56 | 4.924578 |
| E01 | FAM | 19.9  | 82.5 | 未知 | IL-6  | 19.01 | 1        |
| E02 | FAM | 20.3  | 82.5 | 未知 |       | 19.22 | 1        |
| E03 | FAM | 20.62 | 82.5 | 未知 |       | 19.11 | 1        |
| E04 | FAM | 20.19 | 82.5 | 未知 |       | 19.47 | 0.888843 |
| E05 | FAM | 20.09 | 82.5 | 未知 |       | 19.3  | 0.817902 |
| E06 | FAM | 20.57 | 82.5 | 未知 |       | 19.14 | 0.946058 |
| E07 | FAM | 22.57 | 83   | 未知 |       | 19.81 | 3.655326 |
| E08 | FAM | 22.29 | 83   | 未知 |       | 19.56 | 3.138336 |
| E09 | FAM | 22.38 | 82.5 | 未知 |       | 19.38 | 2.80889  |
| E10 | FAM | 23.12 | 82   | 未知 |       | 18.73 | 11.31371 |
| E11 | FAM | 22.01 | 66.5 | 未知 |       | 18.54 | 5.241574 |
| E12 | FAM | 23.05 | 82   | 未知 |       | 18.56 | 7.889862 |
| H01 | FAM | 19.01 | 66   | 未知 | GAPDH |       |          |
| H02 | FAM | 19.22 | 67   | 未知 |       |       |          |
| H03 | FAM | 19.11 | 66.5 | 未知 |       |       |          |
| H04 | FAM | 19.47 | 67   | 未知 |       |       |          |
| H05 | FAM | 19.3  | 66.5 | 未知 |       |       |          |
| H06 | FAM | 19.14 | 66.5 | 未知 |       |       |          |
| H07 | FAM | 19.81 | 66.5 | 未知 |       |       |          |
| H08 | FAM | 19.56 | 66.5 | 未知 |       |       |          |
| H09 | FAM | 19.38 | 66.5 | 未知 |       |       |          |
| H10 | FAM | 18.73 | 66.5 | 未知 |       |       |          |
| H11 | FAM | 18.54 | 66.5 | 未知 |       |       |          |
| H12 | FAM | 18.56 | 66.5 | 未知 |       |       |          |
| 孔位  | 通道  | CT值   | TM值  | 类型 | 目的基因  | 内参    |          |
| A01 | FAM | 27.54 | 0    | 未知 | GRP78 | 18.77 | 1        |
| A02 | FAM | 27.5  | 85   | 未知 |       | 19.13 | 1        |
| A03 | FAM | 27.86 | 85   | 未知 |       | 19.17 | 1        |
| A04 | FAM | 26.04 | 0    | 未知 |       | 16.37 | 1.866066 |
| A05 | FAM | 26.87 | 0    | 未知 |       | 16.44 | 4.169863 |
| A06 | FAM | 26.78 | 86   | 未知 |       | 16.13 | 3.89062  |
| A07 | FAM | 30.09 | 86   | 未知 |       | 17.79 | 11.55143 |
| A08 | FAM | 30.16 | 86   | 未知 |       | 17.54 | 19.02731 |
| A09 | FAM | 29.68 | 86   | 未知 |       | 17.52 | 11.08088 |
| A10 | FAM | 32.12 | 85   | 未知 |       | 19.51 | 14.3204  |
| A11 | FAM | 32.49 | 85.5 | 未知 |       | 19.46 | 25.28132 |
| A12 | FAM | 32.38 | 85.5 | 未知 |       | 19.24 | 21.85664 |
| B01 | FAM | 18.77 | 82   | 未知 | GAPDH | 18.77 | 1        |
| B02 | FAM | 19.13 | 82   | 未知 |       | 19.13 | 1        |
| B03 | FAM | 19.17 | 82   | 未知 |       | 19.17 | 1        |
| B04 | FAM | 16.37 | 84   | 未知 |       | 16.37 | 1        |
| B05 | FAM | 16.44 | 84   | 未知 |       | 16.44 | 1        |
| B06 | FAM | 16.13 | 84   | 未知 |       | 16.13 | 1        |
| B07 | FAM | 17.79 | 83.5 | 未知 |       | 17.79 | 1        |
| B08 | FAM | 17.54 | 83.5 | 未知 |       | 17.54 | 1        |
| B09 | FAM | 17.52 | 83.5 | 未知 |       | 17.52 | 1        |
| B10 | FAM | 19.51 | 83.5 | 未知 |       | 19.51 | 1        |
| B11 | FAM | 19.46 | 83.5 | 未知 |       | 19.46 | 1        |
| B12 | FAM | 19.24 | 83.5 | 未知 |       | 19.24 | 1        |
| C01 | FAM | 36    | 0    | 未知 | CHOP  | 18.77 | 1        |
| C02 | FAM | 36.31 | 0    | 未知 |       | 18.13 | 1        |
| C03 | FAM | 35.37 | 0    | 未知 |       | 18.17 | 1        |

|     |     |       |         |           |       |          |
|-----|-----|-------|---------|-----------|-------|----------|
| C04 | FAM | 33.34 | 0 未知    |           | 16.37 | 0.835088 |
| C05 | FAM | 34.89 | 0 未知    |           | 16.44 | 1.205808 |
| C06 | FAM | 33.08 | 85 未知   |           | 16.13 | 0.840896 |
| C07 | FAM | 35.3  | 83.5 未知 |           | 17.79 | 1.214195 |
| C08 | FAM | 35.14 | 82.5 未知 |           | 17.54 | 0.668964 |
| C09 | FAM | 35    | 83.5 未知 |           | 17.52 | 1.214195 |
| C10 | FAM | 36.37 | 82 未知   |           | 18.51 | 1.547565 |
| C11 | FAM | 37.27 | 0 未知    |           | 18.46 | 1.547565 |
| C12 | FAM | 36.7  | 0 未知    |           | 18.24 | 2.394957 |
| D01 | FAM | 30.65 | 84.5 未知 | Caspase-3 | 18.77 | 1        |
| D02 | FAM | 33.33 | 84.5 未知 |           | 19.13 | 1        |
| D03 | FAM | 32.79 | 84.5 未知 |           | 19.17 | 1        |
| D04 | FAM | 31.11 | 0 未知    |           | 19.37 | 0.907519 |
| D05 | FAM | 32.55 | 84.5 未知 |           | 19.44 | 0.469761 |
| D06 | FAM | 32.81 | 0 未知    |           | 20.13 | 0.521233 |
| D07 | FAM | 34.11 | 85 未知   |           | 19.79 | 5.426417 |
| D08 | FAM | 33.91 | 0 未知    |           | 19.54 | 1.125058 |
| D09 | FAM | 34.33 | 0 未知    |           | 19.52 | 2.281527 |
| D10 | FAM | 33.69 | 84.5 未知 |           | 19.51 | 4.924578 |
| D11 | FAM | 35.61 | 84.5 未知 |           | 19.46 | 3.863745 |
| D12 | FAM | 34.26 | 84.5 未知 |           | 19.24 | 2.639016 |
| E01 | FAM | 35    | 0 未知    | Caspase-7 | 18.77 | 1        |
| E02 | FAM | 34.9  | 0 未知    |           | 19.13 | 1        |
| E03 | FAM | 35.02 | 77.5 未知 |           | 19.17 | 1        |
| E04 | FAM | 35.46 | 0 未知    |           | 19.37 | 0.907519 |
| E05 | FAM | 35.71 | 0 未知    |           | 19.44 | 1.414214 |
| E06 | FAM | 35    | 0 未知    |           | 20.13 | 0.50698  |
| E07 | FAM | 35.21 | 0 未知    |           | 19.79 | 0.570382 |
| E08 | FAM | 35.9  | 0 未知    |           | 19.54 | 1.505247 |
| E09 | FAM | 35.5  | 0 未知    |           | 19.52 | 1.094294 |
| E10 | FAM | 35    | 0 未知    |           | 19.51 | 0.598739 |
| E11 | FAM | 34.71 | 84.5 未知 |           | 19.46 | 0.697372 |
| E12 | FAM | 36    | 0 未知    |           | 19.24 | 1.879045 |
| F01 | FAM | 35.65 | 0 未知    | Caspase-8 | 18.77 | 1        |
| F02 | FAM | 34.64 | 0 未知    |           | 19.13 | 1        |
| F03 | FAM | 34.93 | 84 未知   |           | 19.17 | 1        |
| F04 | FAM | 33.94 | 82 未知   |           | 18.37 | 0.403321 |
| F05 | FAM | 34.65 | 82 未知   |           | 18.44 | 1.624505 |
| F06 | FAM | 33.76 | 82 未知   |           | 17.83 | 1.125058 |
| F07 | FAM | 33.38 | 82 未知   |           | 17.79 | 0.408951 |
| F08 | FAM | 33.29 | 82 未知   |           | 17.54 | 1.180993 |
| F09 | FAM | 33.8  | 82 未知   |           | 17.52 | 1.433955 |
| F10 | FAM | 33.34 | 82 未知   |           | 16.37 | 1.06437  |
| F11 | FAM | 33.03 | 82 未知   |           | 16.44 | 2.114036 |
| F12 | FAM | 32.13 | 82 未知   |           | 16.13 | 1.180993 |
| H01 | FAM | 31.82 | 87 未知   | Bax       | 18.77 | 1        |
| H02 | FAM | 32.5  | 77 未知   |           | 19.13 | 1        |
| H03 | FAM | 31.26 | 87 未知   |           | 19.17 | 1        |
| H04 | FAM | 32.51 | 77.5 未知 |           | 18.37 | 2.12874  |
| H05 | FAM | 32.25 | 87 未知   |           | 18.44 | 1.356604 |
| H06 | FAM | 32.04 | 87.5 未知 |           | 17.83 | 4.346939 |
| H07 | FAM | 33.69 | 87.5 未知 |           | 17.79 | 7.210004 |
| H08 | FAM | 33.15 | 87.5 未知 |           | 17.54 | 4.723971 |
| H09 | FAM | 33.56 | 77.5 未知 |           | 17.52 | 15.45498 |
| H10 | FAM | 35.11 | 78 未知   |           | 16.37 | 51.62507 |
| H11 | FAM | 34.32 | 77.5 未知 |           | 16.44 | 22.7848  |
| H12 | FAM | 33.43 | 77.5 未知 |           | 16.13 | 37.01402 |

| 孔位  | 通道  | CT值   | TM值  | 类型 | 目的基因     | 内参    |
|-----|-----|-------|------|----|----------|-------|
| A01 | FAM | 0     | 0    | 未知 | TNF      | 20.24 |
| A02 | FAM | 0     | 0    | 未知 |          | 18.14 |
| A03 | FAM | 0     | 0    | 未知 |          | 18.25 |
| A04 | FAM | 0     | 0    | 未知 |          | 19.31 |
| A05 | FAM | 0     | 0    | 未知 |          | 19.5  |
| A06 | FAM | 0     | 0    | 未知 |          | 19.36 |
| A07 | FAM | 0     | 0    | 未知 |          | 20.29 |
| A08 | FAM | 0     | 0    | 未知 |          | 20.11 |
| A09 | FAM | 0     | 0    | 未知 |          | 20.21 |
| A10 | FAM | 0     | 0    | 未知 |          | 20.61 |
| A11 | FAM | 0     | 0    | 未知 |          | 20.65 |
| A12 | FAM | 0     | 0    | 未知 |          | 20.69 |
| B01 | FAM | 36.46 | 0    | 未知 | IL-10    | 20.24 |
| B02 | FAM | 0     | 0    | 未知 |          | 18.14 |
| B03 | FAM | 0     | 0    | 未知 |          | 18.25 |
| B04 | FAM | 0     | 0    | 未知 |          | 19.31 |
| B05 | FAM | 0     | 0    | 未知 |          | 19.5  |
| B06 | FAM | 0     | 0    | 未知 |          | 19.36 |
| B07 | FAM | 0     | 0    | 未知 |          | 20.29 |
| B08 | FAM | 0     | 0    | 未知 |          | 20.11 |
| B09 | FAM | 0     | 0    | 未知 |          | 20.21 |
| B10 | FAM | 0     | 0    | 未知 |          | 20.61 |
| B11 | FAM | 0     | 0    | 未知 |          | 20.65 |
| B12 | FAM | 0     | 0    | 未知 |          | 20.69 |
| C01 | FAM | 20.24 | 82.5 | 未知 | 内参       | 20.24 |
| C02 | FAM | 18.14 | 82.5 | 未知 |          | 18.14 |
| C03 | FAM | 18.25 | 82.5 | 未知 |          | 18.25 |
| C04 | FAM | 19.31 | 82.5 | 未知 |          | 19.31 |
| C05 | FAM | 19.5  | 82.5 | 未知 |          | 19.5  |
| C06 | FAM | 19.36 | 82.5 | 未知 |          | 19.36 |
| C07 | FAM | 20.29 | 82.5 | 未知 |          | 20.29 |
| C08 | FAM | 20.11 | 82.5 | 未知 |          | 20.11 |
| C09 | FAM | 20.21 | 82.5 | 未知 |          | 20.21 |
| C10 | FAM | 20.61 | 82.5 | 未知 |          | 20.61 |
| C11 | FAM | 20.65 | 82.5 | 未知 |          | 20.65 |
| C12 | FAM | 20.69 | 82.5 | 未知 |          | 20.69 |
| D01 | FAM | 28.11 | 86   | 未知 | Bcl-2    | 28.11 |
| D02 | FAM | 28.1  | 85.5 | 未知 |          | 18.14 |
| D03 | FAM | 28.07 | 85.5 | 未知 |          | 18.25 |
| D04 | FAM | 27.91 | 85.5 | 未知 |          | 19.31 |
| D05 | FAM | 27.85 | 86   | 未知 |          | 19.5  |
| D06 | FAM | 27.5  | 85.5 | 未知 |          | 19.36 |
| D07 | FAM | 28.79 | 85.5 | 未知 |          | 20.29 |
| D08 | FAM | 28.71 | 85.5 | 未知 |          | 20.11 |
| D09 | FAM | 28.86 | 85.5 | 未知 |          | 20.21 |
| D10 | FAM | 29.83 | 85.5 | 未知 |          | 20.61 |
| D11 | FAM | 29.37 | 85.5 | 未知 |          | 20.65 |
| D12 | FAM | 29.28 | 85.5 | 未知 |          | 20.69 |
| E01 | FAM | 30.31 | 85.5 | 未知 | caspase9 | 18.2  |
| E02 | FAM | 29.98 | 85.5 | 未知 |          | 18.14 |
| E03 | FAM | 30.19 | 85.5 | 未知 |          | 18.25 |
| E04 | FAM | 29.45 | 85.5 | 未知 |          | 19.31 |
| E05 | FAM | 30.28 | 85.5 | 未知 |          | 19.5  |
| E06 | FAM | 29.15 | 85.5 | 未知 |          | 19.36 |
| E07 | FAM | 29.35 | 85.5 | 未知 |          | 20.29 |
| E08 | FAM | 29.87 | 85.5 | 未知 |          | 20.11 |
| E09 | FAM | 29.89 | 85.5 | 未知 |          | 20.21 |

|     |     |       |         |       |       |
|-----|-----|-------|---------|-------|-------|
| E10 | FAM | 29.73 | 85.5 未知 | 29.73 | 20.61 |
| E11 | FAM | 29.94 | 85.5 未知 | 29.94 | 20.65 |
| E12 | FAM | 30.17 | 85.5 未知 | 30.17 | 20.69 |



|           | 孔位  | 通道  | CT值   | TM值 | 类型   |
|-----------|-----|-----|-------|-----|------|
| con       | A01 | FAM | 30.99 |     | 0 未知 |
|           | A02 | FAM | 30.83 |     | 0 未知 |
|           | A03 | FAM | 30.66 |     | 0 未知 |
|           | A04 | FAM | 31.6  |     | 0 未知 |
| GTP       | A05 | FAM | 31.01 |     | 0 未知 |
|           | A06 | FAM | 31.83 |     | 0 未知 |
|           | A07 | FAM | 30.37 |     | 0 未知 |
| GTP+TBBPA | A08 | FAM | 30.63 |     | 0 未知 |
|           | A09 | FAM | 30.31 |     | 0 未知 |
|           | A10 | FAM | 31.57 |     | 0 未知 |
| TBBPA     | A11 | FAM | 31.83 |     | 0 未知 |
|           | A12 | FAM | 31.58 |     | 0 未知 |
| con       | B01 | FAM | 17.35 |     | 0 未知 |
|           | B02 | FAM | 17.33 |     | 0 未知 |
|           | B03 | FAM | 17.41 |     | 0 未知 |
|           | B04 | FAM | 18.33 |     | 0 未知 |
| GTP       | B05 | FAM | 18.25 |     | 0 未知 |
|           | B06 | FAM | 18.33 |     | 0 未知 |
|           | B07 | FAM | 17.13 |     | 0 未知 |
| GTP+TBBPA | B08 | FAM | 16.97 |     | 0 未知 |
|           | B09 | FAM | 17.27 |     | 0 未知 |
|           | B10 | FAM | 17.16 |     | 0 未知 |
| TBBPA     | B11 | FAM | 17.22 |     | 0 未知 |
|           | B12 | FAM | 17.21 |     | 0 未知 |
| con       | C01 | FAM | 32.22 |     | 0 未知 |
|           | C02 | FAM | 32.2  |     | 0 未知 |
|           | C03 | FAM | 31.8  |     | 0 未知 |
|           | C04 | FAM | 33.2  |     | 0 未知 |
| GTP       | C05 | FAM | 32.82 |     | 0 未知 |
|           | C06 | FAM | 32.5  |     | 0 未知 |
|           | C07 | FAM | 32.12 |     | 0 未知 |
| GTP+TBBPA | C08 | FAM | 30.97 |     | 0 未知 |
|           | C09 | FAM | 31.29 |     | 0 未知 |
|           | C10 | FAM | 33.16 |     | 0 未知 |
| TBBPA     | C11 | FAM | 33.15 |     | 0 未知 |
|           | C12 | FAM | 32.93 |     | 0 未知 |
| con       | D01 | FAM | 30.67 |     | 0 未知 |
|           | D02 | FAM | 30.58 |     | 0 未知 |
|           | D03 | FAM | 30.81 |     | 0 未知 |
|           | D04 | FAM | 31.43 |     | 0 未知 |
| GTP       | D05 | FAM | 31.43 |     | 0 未知 |
|           | D06 | FAM | 31.6  |     | 0 未知 |
|           | D07 | FAM | 30.22 |     | 0 未知 |
| GTP+TBBPA | D08 | FAM | 30.1  |     | 0 未知 |
|           | D09 | FAM | 30.76 |     | 0 未知 |
|           | D10 | FAM | 31.29 |     | 0 未知 |
| TBBPA     | D11 | FAM | 31.07 |     | 0 未知 |
|           | D12 | FAM | 31.08 |     | 0 未知 |
| con       | E01 | FAM | 0     |     | 0 未知 |
|           | E02 | FAM | 34.72 |     | 0 未知 |
|           | E03 | FAM | 34.33 |     | 0 未知 |
|           | E04 | FAM | 0     |     | 0 未知 |
| GTP       | E05 | FAM | 0     |     | 0 未知 |
|           | E06 | FAM | 0     |     | 0 未知 |
|           | E07 | FAM | 0     |     | 0 未知 |
| GTP+TBBPA | E08 | FAM | 0     |     | 0 未知 |
|           | E09 | FAM | 0     |     | 0 未知 |

|           |     |     |       |   |    |
|-----------|-----|-----|-------|---|----|
|           | E10 | FAM | 34.42 | 0 | 未知 |
| TBBPA     | E11 | FAM | 34.11 | 0 | 未知 |
|           | E12 | FAM | 0     | 0 | 未知 |
|           | F01 | FAM | 32.36 | 0 | 未知 |
| con       | F02 | FAM | 32.79 | 0 | 未知 |
|           | F03 | FAM | 32.36 | 0 | 未知 |
|           | F04 | FAM | 33.17 | 0 | 未知 |
| GTP       | F05 | FAM | 33.68 | 0 | 未知 |
|           | F06 | FAM | 33.02 | 0 | 未知 |
|           | F07 | FAM | 32.19 | 0 | 未知 |
| GTP+TBBPA | F08 | FAM | 32.43 | 0 | 未知 |
|           | F09 | FAM | 32.17 | 0 | 未知 |
|           | F10 | FAM | 33.32 | 0 | 未知 |
| TBBPA     | F11 | FAM | 33.58 | 0 | 未知 |
|           | F12 | FAM | 33.59 | 0 | 未知 |
|           | G01 | FAM | 32.09 | 0 | 未知 |
|           | G02 | FAM | 32.94 | 0 | 未知 |
| con       | G03 | FAM | 32.64 | 0 | 未知 |
|           | G04 | FAM | 33.07 | 0 | 未知 |
|           | G05 | FAM | 33.72 | 0 | 未知 |
| GTP       | G06 | FAM | 33.81 | 0 | 未知 |
|           | G07 | FAM | 31.77 | 0 | 未知 |
|           | G08 | FAM | 32.57 | 0 | 未知 |
| GTP+TBBPA | G09 | FAM | 32.31 | 0 | 未知 |
|           | G10 | FAM | 33.56 | 0 | 未知 |
|           | G11 | FAM | 33.6  | 0 | 未知 |
| TBBPA     | G12 | FAM | 33.78 | 0 | 未知 |
|           | H01 | FAM | 27.1  | 0 | 未知 |
|           | H02 | FAM | 27.02 | 0 | 未知 |
| con       | H03 | FAM | 27.04 | 0 | 未知 |
|           | H04 | FAM | 28.13 | 0 | 未知 |
|           | H05 | FAM | 27.85 | 0 | 未知 |
| GTP       | H06 | FAM | 27.52 | 0 | 未知 |
|           | H07 | FAM | 26.79 | 0 | 未知 |
|           | H08 | FAM | 26.67 | 0 | 未知 |
| GTP+TBBPA | H09 | FAM | 26.81 | 0 | 未知 |
|           | H10 | FAM | 25.42 | 0 | 未知 |
|           | H11 | FAM | 25.15 | 0 | 未知 |
| TBBPA     | H12 | FAM | 25.28 | 0 | 未知 |

|           | 孔位  | 通道  | CT值   | TM值  | 类型 |
|-----------|-----|-----|-------|------|----|
| con       | A01 | FAM | 26.85 | 83   | 未知 |
| GTP       | A02 | FAM | 26.57 | 83   | 未知 |
|           | A03 | FAM | 26.92 | 83   | 未知 |
|           | A04 | FAM | 28.2  | 83   | 未知 |
| GTP+TBBPA | A05 | FAM | 28.16 | 83   | 未知 |
|           | A06 | FAM | 27.9  | 83   | 未知 |
|           | A07 | FAM | 28.03 | 83   | 未知 |
| TBBPA     | A08 | FAM | 28.19 | 83   | 未知 |
|           | A09 | FAM | 27.78 | 83   | 未知 |
|           | A10 | FAM | 29.21 | 83   | 未知 |
| con       | A11 | FAM | 29.27 | 83   | 未知 |
|           | A12 | FAM | 29.14 | 83   | 未知 |
|           | B01 | FAM | 31.83 | 83.5 | 未知 |
| GTP       | B02 | FAM | 31.51 | 83.5 | 未知 |
|           | B03 | FAM | 31.94 | 83   | 未知 |

|           |     |     |       |         |
|-----------|-----|-----|-------|---------|
| GTP+TBBPA | B04 | FAM | 35.76 | 83.5 未知 |
|           | B05 | FAM | 36.08 | 83.5 未知 |
|           | B06 | FAM | 35.43 | 83.5 未知 |
| TBBPA     | B07 | FAM | 35.87 | 83.5 未知 |
|           | B08 | FAM | 36.65 | 0 未知    |
|           | B09 | FAM | 36.69 | 0 未知    |
| con       | B10 | FAM | 36.69 | 0 未知    |
|           | B11 | FAM | 36.28 | 83.5 未知 |
|           | B12 | FAM | 38.79 | 0 未知    |
| GTP       | C01 | FAM | 24.81 | 82.5 未知 |
|           | C02 | FAM | 24.68 | 82.5 未知 |
|           | C03 | FAM | 24.92 | 82.5 未知 |
| GTP+TBBPA | C04 | FAM | 25.73 | 82.5 未知 |
|           | C05 | FAM | 25.67 | 82.5 未知 |
|           | C06 | FAM | 25.7  | 82.5 未知 |
| TBBPA     | C07 | FAM | 26.36 | 82.5 未知 |
|           | C08 | FAM | 26.35 | 82.5 未知 |
|           | C09 | FAM | 26.42 | 82.5 未知 |
| con       | C10 | FAM | 26.69 | 82.5 未知 |
|           | C11 | FAM | 26.73 | 82.5 未知 |
|           | C12 | FAM | 27.02 | 83 未知   |

GTP

孔位

GTP+TBBPA

A01

A02

A03

A04

TBBPA

A05

A06

A07

con

A08

A09

A10

GTP

A11

A12

B01

GTP+TBBPA

B02

B03

B04

TBBPA

B05

B06

B07

con

B08

B09

B10

GTP

B11

B12

GTP+TBBPA

C01

C02

C03

C04

TBBPA

C05

C06

C07

con

C08

C09

C10

|           |     |
|-----------|-----|
| GTP       | C11 |
|           | C12 |
| GTP+TBBPA | D01 |
|           | D02 |
|           | D03 |
| TBBPA     | D04 |
|           | D05 |
|           | D06 |
| con       | D07 |
|           | D08 |
|           | D09 |
| GTP       | D10 |
|           | D11 |
|           | D12 |
| GTP+TBBPA | E01 |
|           | E02 |
|           | E03 |
| TBBPA     | E04 |
|           | E05 |
|           | E06 |
| con       | E07 |
|           | E08 |
|           | E09 |
| GTP       | E10 |
|           | E11 |
|           | E12 |
| GTP+TBBPA | F01 |
|           | F02 |
|           | F03 |
| TBBPA     | F04 |
|           | F05 |
|           | F06 |
| con       | F07 |
|           | F08 |
|           | F09 |
| GTP       | F10 |
|           | F11 |
|           | F12 |
| GTP+TBBPA | G01 |
|           | G02 |
|           | G03 |
| TBBPA     | G04 |
|           | G05 |
|           | G06 |
| con       | G07 |
|           | G08 |
|           | G09 |
| GTP       | G10 |
|           | G11 |
|           | G12 |
| GTP+TBBPA | H01 |
|           | H02 |
|           | H03 |
| TBBPA     | H04 |
|           | H05 |
|           | H06 |
|           | H07 |
|           | H08 |

| ▲CT    | ▲▲CT         | 通道基因        |         | H09 |
|--------|--------------|-------------|---------|-----|
| -20.24 | -1.363333333 | 2.572789339 |         | H10 |
| -18.14 | 0.736666667  | 0.600124333 | con     | H11 |
| -18.25 | 0.626666667  | 0.647671126 |         | H12 |
| -19.31 | -0.433333333 | 1.350349946 |         |     |
| -19.5  | -0.623333333 | 1.540430222 | GTP     |     |
| -19.36 | -0.483333333 | 1.397969934 |         |     |
| -20.29 | -1.413333333 | 2.663518559 | GTP+TBB |     |
| -20.11 | -1.233333333 | 2.351095813 | PA      |     |
| -20.21 | -1.333333333 | 2.5198421   |         | 孔位  |
| -20.61 | -1.733333333 | 3.324951585 |         | A01 |
| -20.65 | -1.773333333 | 3.418428697 | TBBPA   | A02 |
| -20.69 | -1.813333333 | 3.514533809 |         | A03 |
| -20.24 | -1.363333333 | 2.572789339 |         | A04 |
| -18.14 | 0.736666667  | 0.600124333 | con     | A05 |
| -18.25 | 0.626666667  | 0.647671126 |         | A06 |
| -19.31 | -0.433333333 | 1.350349946 |         | A07 |
| -19.5  | -0.623333333 | 1.540430222 | GTP     | A08 |
| -19.36 | -0.483333333 | 1.397969934 |         | A09 |
| -20.29 | -1.413333333 | 2.663518559 | GTP+TBB | A10 |
| -20.11 | -1.233333333 | 2.351095813 | PA      | A11 |
| -20.21 | -1.333333333 | 2.5198421   |         | A12 |
| -20.61 | -1.733333333 | 3.324951585 |         | B01 |
| -20.65 | -1.773333333 | 3.418428697 | TBBPA   | B02 |
| -20.69 | -1.813333333 | 3.514533809 |         | B03 |
| 0      | 0            | 1           |         | B04 |
| 0      | 0            | 1           | con     | B05 |
| 0      | 0            | 1           |         | B06 |
| 0      | 0            | 1           |         | B07 |
| 0      | 0            | 1           | GTP     | B08 |
| 0      | 0            | 1           |         | B09 |
| 0      | 0            | 1           | GTP+TBB | B10 |
| 0      | 0            | 1           | PA      | B11 |
| 0      | 0            | 1           |         | B12 |
| 0      | 0            | 1           |         | C01 |
| 0      | 0            | 1           | TBBPA   | C02 |
| 0      | 0            | 1           |         | C03 |
| 9.91   | 0.013333333  | 0.990800613 |         | C04 |
| 9.96   | 0.063333333  | 0.957050307 | con     | C05 |
| 9.82   | -0.076666667 | 1.05457863  |         | C06 |
| 8.6    | -1.296666667 | 2.456606299 |         | C07 |
| 8.35   | -1.546666667 | 2.921413689 | GTP     | C08 |
| 8.54   | -1.356666667 | 2.560927954 |         | C09 |
| 8.5    | -1.396666667 | 2.632925439 | GTP+TBB | C10 |
| 8.6    | -1.296666667 | 2.456606299 | PA      | C11 |
| 8.65   | -1.246666667 | 2.37292527  |         | C12 |
| 8.69   | -1.206666667 | 2.308037504 |         | D01 |
| 8.72   | -1.176666667 | 2.260538779 | TBBPA   | D02 |
| 8.59   | -1.306666667 | 2.473693347 |         | D03 |
| 12.11  | 0.146666667  | 0.903335201 |         | D04 |
| 11.84  | -0.123333333 | 1.089248656 | con     | D05 |
| 11.94  | -0.023333333 | 1.016304932 |         | D06 |
| 10.14  | -1.823333333 | 3.538979325 |         | D07 |
| 10.78  | -1.183333333 | 2.271008858 | GTP     | D08 |
| 9.79   | -2.173333333 | 4.510643708 |         | D09 |
| 9.06   | -2.903333333 | 7.481529983 | GTP+TBB | D10 |
| 9.76   | -2.203333333 | 4.605421921 | PA      | D11 |
| 9.68   | -2.283333333 | 4.868014055 |         | D12 |

|      |              |             |       |
|------|--------------|-------------|-------|
| 9.12 | -2.843333333 | 7.17676327  |       |
| 9.29 | -2.673333333 | 6.379013507 | TBBPA |
| 9.48 | -2.483333333 | 5.591879737 |       |

E01  
E02  
E03  
E04  
E05  
E06  
E07  
E08  
E09  
E10  
E11  
E12  
F01  
F02  
F03  
F04  
F05  
F06  
F07  
F08  
F09  
F10  
F11  
F12  
G01  
G02  
G03  
G04  
G05  
G06  
G07  
G08  
G09  
G10  
G11  
G12  
H01  
H02  
H03  
H04  
H05  
H06  
H07  
H08  
H09  
H10  
H11  
H12

| 目的基因           | 内参    |          |          |
|----------------|-------|----------|----------|
| PERK           | 17.35 | 0.835088 |          |
|                | 17.33 | 1.006956 | con      |
|                | 17.41 | 0.602904 |          |
|                | 18.33 | 0.646176 | GTP+TBB  |
|                | 18.25 | 0.602904 | PA       |
|                | 18.33 | 0.716978 |          |
|                | 17.13 | 0.632878 | NAC+TBB  |
|                | 16.97 | 1.125058 | PA       |
|                | 17.27 | 0.521233 |          |
|                | 17.16 | 1.42405  |          |
|                | 17.22 | 2.17347  | TBBPA    |
|                | 17.21 | 1.310393 |          |
|                | GAPDH | 17.35    | 1        |
| 17.33          |       | 1        | con      |
| 17.41          |       | 1        |          |
| 18.33          |       | 1        | GTP+TBB  |
| 18.25          |       | 1        | PA       |
| 18.33          |       | 1        |          |
| 17.13          |       | 1        | NAC+TBB  |
| 16.97          |       | 1        | PA       |
| 17.27          |       | 1        |          |
| 17.16          |       | 1        |          |
| 17.22          |       | 1        | TBBPA    |
| 17.21          |       | 1        |          |
| eif-2 $\alpha$ |       | 17.35    | 35.26096 |
|                | 17.33 | 1.658639 | con      |
|                | 17.41 | 2.675855 |          |
|                | 18.33 | 35.26096 | GTP+TBB  |
|                | 18.25 | 35.50622 | PA       |
|                | 18.33 | 32.22258 |          |
|                | 17.13 | 38.31932 | NAC+TBB  |
|                | 16.97 | 23.91759 | PA       |
|                | 17.27 | 29.04061 |          |
|                | 17.16 | 77.1717  |          |
|                | 17.22 | 91.13921 | TBBPA    |
|                | 17.21 | 94.35323 |          |
|                | GRP78 | 17.35    | 4.924578 |
| 17.33          |       | 4.823231 | con      |
| 17.41          |       | 4.924578 |          |
| 18.33          |       | 4.228072 | GTP+TBB  |
| 18.25          |       | 4.594793 | PA       |
| 18.33          |       | 4.500234 |          |
| 17.13          |       | 4.198867 | NAC+TBB  |
| 16.97          |       | 4.438278 | PA       |
| 17.27          |       | 5.241574 |          |
| 17.16          |       | 8.633826 |          |
| 17.22          |       | 7.310652 | TBBPA    |
| 17.21          |       | 6.821079 |          |
| Caspase-7      |       | 17.35    | 1.57E-09 |
|                | 17.33 | 18.50701 | con      |
|                | 17.41 | 37.53072 |          |
|                | 18.33 | 7.94E-10 | GTP+TBB  |
|                | 18.25 | 3.46E-10 | PA       |
|                | 18.33 | 9.19E-10 |          |
|                | 17.13 | 1.82E-09 | NAC+TBB  |
|                | 16.97 | 8.39E-10 | PA       |
|                | 17.27 | 1.92E-09 |          |

|       |       |          |         |
|-------|-------|----------|---------|
|       | 17.16 | 41.06963 |         |
|       | 17.22 | 13.08643 | TBBPA   |
|       | 17.21 | 2E-09    |         |
| Bax   | 17.35 | 0.716978 |         |
|       | 17.33 | 0.933033 | con     |
|       | 17.41 | 0.959264 |         |
|       | 18.33 | 0.63728  | GTP+TBB |
|       | 18.25 | 0.913831 | PA      |
|       | 18.33 | 0.80107  |         |
|       | 17.13 | 0.742262 | NAC+TBB |
|       | 16.97 | 0.933033 | PA      |
|       | 17.27 | 0.926588 |         |
|       | 17.16 | 1.591073 |         |
|       | 17.22 | 1.741101 | TBBPA   |
|       | 17.21 | 2.584706 |         |
| ATF-6 | 17.35 | #VALUE!  |         |
|       | 17.33 | 3492.393 | con     |
|       | 17.41 | 3795.305 |         |
|       | 18.33 | #VALUE!  | GTP+TBB |
|       | 18.25 | 3169.413 | PA      |
|       | 18.33 | 4513.403 |         |
|       | 17.13 | #VALUE!  | NAC+TBB |
|       | 16.97 | 3468.269 | PA      |
|       | 17.27 | 3326.986 |         |
|       | 17.16 | #VALUE!  |         |
|       | 17.22 | 5955.471 | TBBPA   |
|       | 17.21 | 9607.864 |         |
| BCL-2 | 17.35 | 3.863745 |         |
|       | 17.33 | 280.1392 | con     |
|       | 17.41 | 162.0168 |         |
|       | 18.33 | 4        | GTP+TBB |
|       | 18.25 | 263.1971 | PA      |
|       | 18.33 | 119.4282 |         |
|       | 17.13 | 3.630077 | NAC+TBB |
|       | 16.97 | 282.0877 | PA      |
|       | 17.27 | 152.2185 |         |
|       | 17.16 | 1.375542 |         |
|       | 17.22 | 82.71058 | TBBPA   |
|       | 17.21 | 54.94819 |         |

| 目的基因     | 内参    |       |       |               |               |          |     |
|----------|-------|-------|-------|---------------|---------------|----------|-----|
| caspase7 | 26.85 | 18.2  | 8.65  | 0.06666667    | 0.954842      |          |     |
|          | 26.57 | 18.14 | 8.43  | -0.1533333333 | 1.112136      | con      |     |
|          | 26.92 | 18.25 | 8.67  | 0.086666667   | 0.941696      |          |     |
|          | 28.2  | 19.31 | 8.89  | 0.306666667   | 0.808508      | GTP+TBB  |     |
|          | 28.16 | 19.5  | 8.66  | 0.076666667   | 0.948246      | PA       |     |
|          | 27.9  | 19.36 | 8.54  | -0.0433333333 | 1.030492      |          |     |
|          | 28.03 | 20.19 | 7.84  | -0.7433333333 | 1.674039      | NAC+TBB  |     |
|          | 28.19 | 20.11 | 8.08  | -0.5033333333 | 1.417485      | PA       |     |
|          | 27.78 | 20.21 | 7.57  | -1.0133333333 | 2.01857       |          |     |
|          | 29.21 | 20.61 | 8.6   | 0.016666667   | 0.988514      |          |     |
|          | 29.27 | 20.65 | 8.62  | 0.036666667   | 0.974905      | TBBPA    |     |
|          | 29.14 | 20.69 | 8.45  | -0.1333333333 | 1.096825      |          |     |
|          | XBP1  | 31.83 | 20.24 | 11.59         | -1.2933333333 | 2.450937 |     |
|          |       | 31.51 | 18.14 | 13.37         | 0.486666667   | 0.713672 | con |
| 31.94    |       | 18.25 | 13.69 | 0.806666667   | 0.571701      |          |     |



|                |       |       |       |              |          |         |
|----------------|-------|-------|-------|--------------|----------|---------|
|                | 35.76 | 19.31 | 16.45 | 3.566666667  | 0.084397 | GTP+TBB |
|                | 36.08 | 19.5  | 16.58 | 3.696666667  | 0.077125 | PA      |
|                | 35.43 | 19.36 | 16.07 | 3.186666667  | 0.109829 |         |
|                | 35.87 | 20.29 | 15.58 | 2.696666667  | 0.154249 | NAC+TBB |
|                | 36.65 | 20.11 | 16.54 | 3.656666667  | 0.079293 | PA      |
|                | 36.69 | 20.21 | 16.48 | 3.596666667  | 0.08266  |         |
|                | 36.69 | 20.61 | 16.08 | 3.196666667  | 0.109071 |         |
|                | 36.28 | 20.65 | 15.63 | 2.746666667  | 0.148995 | TBBPA   |
|                | 38.79 | 20.69 | 18.1  | 5.216666667  | 0.026892 |         |
| Eif-2 $\alpha$ | 24.81 | 18.2  | 6.61  | 0.003333333  | 0.997692 |         |
|                | 24.68 | 18.14 | 6.54  | -0.066666667 | 1.047294 | con     |
|                | 24.92 | 18.25 | 6.67  | 0.063333333  | 0.95705  |         |
|                | 25.73 | 19.31 | 6.42  | -0.186666667 | 1.138131 | GTP+TBB |
|                | 25.67 | 19.5  | 6.17  | -0.436666667 | 1.353474 | PA      |
|                | 25.7  | 19.36 | 6.34  | -0.266666667 | 1.203025 |         |
|                | 26.36 | 20.29 | 6.07  | -0.536666667 | 1.450617 | NAC+TBB |
|                | 26.35 | 20.11 | 6.24  | -0.366666667 | 1.28937  | PA      |
|                | 26.42 | 20.21 | 6.21  | -0.396666667 | 1.316463 |         |
|                | 26.69 | 20.61 | 6.08  | -0.526666667 | 1.440597 |         |
|                | 26.73 | 20.65 | 6.08  | -0.526666667 | 1.440597 | TBBPA   |
|                | 27.02 | 20.69 | 6.33  | -0.276666667 | 1.211393 |         |

| 通道  | CT值   | 类型 | 目的基因      | 样本名称  | 管家基因      |
|-----|-------|----|-----------|-------|-----------|
| FAM | 20.87 | 未知 |           | 20.87 | 1         |
| FAM | 20.92 | 未知 |           | 20.92 | 1 con     |
| FAM | 20.96 | 未知 |           | 20.96 | 1         |
| FAM | 22.42 | 未知 |           | 22.42 | 1 GTP+TBB |
| FAM | 22.18 | 未知 |           | 22.18 | 1 PA      |
| FAM | 22.36 | 未知 |           | 22.36 | 1         |
| FAM | 23.6  | 未知 |           | 23.6  | 1 NAC+TBB |
| FAM | 24.7  | 未知 |           | 24.7  | 1 PA      |
| FAM | 23.11 | 未知 |           | 23.11 | 1         |
| FAM | 21.1  | 未知 |           | 21.1  | 1         |
| FAM | 20.73 | 未知 |           | 20.73 | 1 TBBPA   |
| FAM | 20.69 | 未知 |           | 20.69 | 1         |
| FAM | 34.15 | 未知 |           | 20.87 | 1         |
| FAM | 36.68 | 未知 |           | 20.92 | 1 con     |
| FAM | 36.28 | 未知 |           | 20.96 | 1         |
| FAM | 37.33 | 未知 |           | 22.42 | 3.09513   |
| FAM |       | 未知 |           | 22.18 | 3.79E-12  |
| FAM | 0     | 未知 |           | 22.36 | 4.54E-12  |
| FAM | 36.94 | 未知 |           | 23.6  | 1.042466  |
| FAM | 36.9  | 未知 |           | 24.7  | 0.084788  |
| FAM | 36.88 | 未知 |           | 23.11 | 0.34151   |
| FAM | 0     | 未知 |           | 21.1  | 4.47E-11  |
| FAM | 0     | 未知 |           | 20.73 | 1.04E-11  |
| FAM | 0     | 未知 |           | 20.69 | 1.45E-11  |
| FAM | 24.87 | 未知 | Caspase-9 | 20.87 | 1         |
| FAM | 24.9  | 未知 |           | 20.92 | 1 con     |
| FAM | 24.95 | 未知 |           | 20.96 | 1         |
| FAM | 26.6  | 未知 |           | 22.42 | 1.132884  |
| FAM | 26.32 | 未知 |           | 22.18 | 1.117287  |
| FAM | 26.01 | 未知 |           | 22.36 | 0.790041  |
| FAM | 27.21 | 未知 |           | 23.6  | 0.76313   |
| FAM | 28.41 | 未知 |           | 24.7  | 0.82932   |
| FAM | 26.49 | 未知 |           | 23.11 | 0.655197  |
| FAM | 27.3  | 未知 |           | 21.1  | 4.594793  |

|     |       |    |               |       |          |            |
|-----|-------|----|---------------|-------|----------|------------|
| FAM | 26.56 | 未知 |               | 20.73 | 3.605002 | TBBPA      |
| FAM | 26.48 | 未知 |               | 20.69 | 3.482202 |            |
| FAM | 21.15 | 未知 | IKB- $\alpha$ | 20.87 | 1        |            |
| FAM | 21.16 | 未知 |               | 20.92 | 1        | con        |
| FAM | 20.99 | 未知 |               | 20.96 | 1        |            |
| FAM | 22.85 | 未知 |               | 22.42 | 1.109569 | GTP+TBB    |
| FAM | 21.96 | 未知 |               | 22.18 | 0.726986 | PA         |
| FAM | 22.17 | 未知 |               | 22.36 | 0.858565 |            |
| FAM | 24.1  | 未知 |               | 23.6  | 1.164734 | NAC+TBB    |
| FAM | 24.56 | 未知 |               | 24.7  | 0.768438 | PA         |
| FAM | 23.17 | 未知 |               | 23.11 | 1.021012 |            |
| FAM | 23.36 | 未知 |               | 21.1  | 3.944931 |            |
| FAM | 23.26 | 未知 |               | 20.73 | 4.890561 | TBBPA      |
| FAM | 23.26 | 未知 |               | 20.69 | 5.81589  |            |
| FAM | 23.02 | 未知 | NF-KB         | 20.87 | 1        |            |
| FAM | 23.1  | 未知 |               | 20.92 | 1        | con        |
| FAM | 23.05 | 未知 |               | 20.96 | 1        |            |
| FAM | 24.77 | 未知 |               | 22.42 | 1.148698 | GTP+TBB    |
| FAM | 24.5  | 未知 |               | 22.18 | 1.101905 | PA         |
| FAM | 24.25 | 未知 |               | 22.36 | 0.870551 |            |
| FAM | 26.11 | 未知 |               | 23.6  | 1.283426 | NAC+TBB    |
| FAM | 26.82 | 未知 |               | 24.7  | 0.959264 | PA         |
| FAM | 25.16 | 未知 |               | 23.11 | 0.972655 |            |
| FAM | 25.65 | 未知 |               | 21.1  | 5.278032 |            |
| FAM | 24.97 | 未知 |               | 20.73 | 4.169863 | TBBPA      |
| FAM | 25.43 | 未知 |               | 20.69 | 6.276673 |            |
| FAM | 20.59 | 未知 | TNF- $\alpha$ | 20.87 | 1        |            |
| FAM | 20.71 | 未知 |               | 20.92 | 1        | con        |
| FAM | 20.56 | 未知 |               | 20.96 | 1        |            |
| FAM | 22.32 | 未知 |               | 22.42 | 1.132884 | GTP+TBB    |
| FAM | 22.44 | 未知 |               | 22.18 | 1.385109 | PA         |
| FAM | 22.33 | 未知 |               | 22.36 | 1.292353 |            |
| FAM | 23.75 | 未知 |               | 23.6  | 1.347234 | NAC+TBB    |
| FAM | 24.45 | 未知 |               | 24.7  | 0.972655 | PA         |
| FAM | 23.83 | 未知 |               | 23.11 | 2.17347  |            |
| FAM | 24.5  | 未知 |               | 21.1  | 12.81712 |            |
| FAM | 24.65 | 未知 |               | 20.73 | 17.5087  | TBBPA      |
| FAM | 24.37 | 未知 |               | 20.69 | 16.91229 |            |
| FAM | 23.66 | 未知 | IL-1 $\beta$  | 20.87 | 1        |            |
| FAM | 23.66 | 未知 |               | 20.92 | 1        | con        |
| FAM | 23.85 | 未知 |               | 20.96 | 1        |            |
| FAM | 25.55 | 未知 |               | 22.42 | 1.265757 | GTP+TBB    |
| FAM | 26.64 | 未知 |               | 22.18 | 3.294364 | PA         |
| FAM | 26.83 | 未知 |               | 22.36 | 2.989698 |            |
| FAM | 27.17 | 未知 |               | 23.6  | 1.717131 | NAC+TBB    |
| FAM | 28.29 | 未知 |               | 24.7  | 1.802501 | PA         |
| FAM | 27.03 | 未知 |               | 23.11 | 2.042024 |            |
| FAM | 26.72 | 未知 |               | 21.1  | 7.110741 |            |
| FAM | 26.6  | 未知 |               | 20.73 | 8.75435  | TBBPA      |
| FAM | 26.7  | 未知 |               | 20.69 | 8.693879 |            |
| FAM | 24.35 | 未知 | IL-6          | 20.87 | 1        |            |
| FAM | 24.51 | 未知 |               | 20.92 | 1        | con        |
| FAM | 24.27 | 未知 |               | 20.96 | 1        |            |
| FAM | 26.3  | 未知 |               | 22.42 | 1.319508 | GTP+TBB    |
| FAM | 26.35 | 未知 |               | 22.18 | 1.494849 | PA         |
| FAM | 26.4  | 未知 |               | 22.36 | 1.658639 |            |
| FAM | 27.13 | 未知 |               | 23.6  | 1.035265 | NAC+TBB    |
| FAM | 27.61 | 未知 |               | 23.7  | 1.248331 | D $\Delta$ |

|     |       |    |  |  |       |          |       |
|-----|-------|----|--|--|-------|----------|-------|
| FAM | 27.09 | 未知 |  |  | 23.11 | 1.591073 | 「^    |
| FAM | 27.01 | 未知 |  |  | 21.1  | 5.388934 |       |
| FAM | 27.03 | 未知 |  |  | 20.73 | 6.543216 | TBBPA |
| FAM | 26.78 | 未知 |  |  | 20.69 | 6.868523 |       |

| 通道  | CT值   | TM值  | 类型 | 目的基因  | 样本名称  | 管家基因     |         |
|-----|-------|------|----|-------|-------|----------|---------|
| FAM | 22.5  | 84   | 未知 | IRE-1 | 15.16 | 1        |         |
| FAM | 22.62 | 84   | 未知 |       | 15.42 | 1        | con     |
| FAM | 22.37 | 84   | 未知 |       | 15.39 | 1        |         |
| FAM | 24.21 | 84   | 未知 |       | 15.76 | 2.158456 | GTP+TBB |
| FAM | 23.01 | 84   | 未知 |       | 15.65 | 1.117287 | PA      |
| FAM | 23.53 | 84   | 未知 |       | 15.59 | 1.94531  |         |
| FAM | 23.02 | 84   | 未知 |       | 15.32 | 1.283426 | NAC+TBB |
| FAM | 23.23 | 84   | 未知 |       | 15.16 | 1.827663 | PA      |
| FAM | 23.07 | 84   | 未知 |       | 15.31 | 1.717131 |         |
| FAM | 25.63 | 83.5 | 未知 |       | 15.8  | 5.61778  |         |
| FAM | 24.81 | 83.5 | 未知 |       | 15.59 | 4.055838 | TBBPA   |
| FAM | 24.65 | 84   | 未知 |       | 15.69 | 3.944931 |         |
| FAM | 25.89 | 80   | 未知 | XBP-1 | 15.16 | 1        |         |
| FAM | 24.81 | 83.5 | 未知 |       | 15.42 | 1        | con     |
| FAM | 24.56 | 84.5 | 未知 |       | 15.39 | 1        |         |
| FAM | 25.94 | 84.5 | 未知 |       | 15.76 | 0.68302  | GTP+TBB |
| FAM | 25.14 | 0    | 未知 |       | 15.65 | 1.071773 | PA      |
| FAM | 25.13 | 84.5 | 未知 |       | 15.59 | 1.292353 |         |
| FAM | 25.73 | 84.5 | 未知 |       | 15.32 | 0.80107  | NAC+TBB |
| FAM | 24.98 | 84   | 未知 |       | 15.16 | 1.347234 | PA      |
| FAM | 24.51 | 84   | 未知 |       | 15.31 | 1.021012 |         |
| FAM | 28.89 | 84   | 未知 |       | 15.8  | 5.133704 |         |
| FAM | 28.07 | 84   | 未知 |       | 15.59 | 8.514961 | TBBPA   |
| FAM | 28.15 | 84   | 未知 |       | 15.69 | 9.781122 |         |
| FAM | 29.76 | 85   | 未知 | ATF-4 | 15.16 | 1        |         |
| FAM | 30.04 | 85   | 未知 |       | 15.42 | 1        | con     |
| FAM | 29.27 | 85   | 未知 |       | 15.39 | 1        |         |
| FAM | 30.08 | 0    | 未知 |       | 15.76 | 0.823591 | GTP+TBB |
| FAM | 30.22 | 85   | 未知 |       | 15.65 | 0.965936 | PA      |
| FAM | 29.76 | 85   | 未知 |       | 15.59 | 1.22264  |         |
| FAM | 29.87 | 85   | 未知 |       | 15.32 | 0.965936 | NAC+TBB |
| FAM | 30.02 | 85   | 未知 |       | 15.16 | 1.180993 | PA      |
| FAM | 29.24 | 85   | 未知 |       | 15.31 | 1.035265 |         |
| FAM | 31.68 | 85   | 未知 |       | 15.8  | 2.42839  |         |
| FAM | 31.56 | 85   | 未知 |       | 15.59 | 2.549121 | TBBPA   |
| FAM | 31.07 | 83.5 | 未知 |       | 15.69 | 2.828427 |         |
| FAM | 23.93 | 83.5 | 未知 | CHOP  | 15.16 | 1        |         |
| FAM | 21.84 | 83.5 | 未知 |       | 15.42 | 1        | con     |
| FAM | 22.78 | 83.5 | 未知 |       | 15.39 | 1        |         |
| FAM | 23.98 | 83.5 | 未知 |       | 15.76 | 0.68302  | GTP+TBB |
| FAM | 22.17 | 83.5 | 未知 |       | 15.65 | 1.071773 | PA      |
| FAM | 22.96 | 83.5 | 未知 |       | 15.59 | 0.986233 |         |
| FAM | 23.88 | 83.5 | 未知 |       | 15.32 | 0.864537 | NAC+TBB |
| FAM | 21.92 | 83.5 | 未知 |       | 15.16 | 1.265757 | PA      |
| FAM | 22.39 | 83.5 | 未知 |       | 15.31 | 0.806642 |         |
| FAM | 25.72 | 83.5 | 未知 |       | 15.8  | 2.219139 |         |
| FAM | 22.94 | 83.5 | 未知 |       | 15.59 | 1.905276 | TBBPA   |
| FAM | 23.97 | 83   | 未知 |       | 15.69 | 1.853176 |         |

|     |       |      |    |           |       |          |         |
|-----|-------|------|----|-----------|-------|----------|---------|
| FAM | 21.87 | 84   | 未知 | Caspase-3 | 15.16 | 1        |         |
| FAM | 21.82 | 83.5 | 未知 |           | 15.42 | 1        | con     |
| FAM | 20.66 | 83.5 | 未知 |           | 15.39 | 1        |         |
| FAM | 22.13 | 84   | 未知 |           | 15.76 | 0.790041 | GTP+TBB |
| FAM | 21.82 | 84   | 未知 |           | 15.65 | 0.852635 | PA      |
| FAM | 21.31 | 84   | 未知 |           | 15.59 | 1.36604  |         |
| FAM | 21.39 | 83.5 | 未知 |           | 15.32 | 0.641713 | NAC+TBB |
| FAM | 21.71 | 84   | 未知 |           | 15.16 | 1.109569 | PA      |
| FAM | 20.08 | 84   | 未知 |           | 15.31 | 0.707107 |         |
| FAM | 23.47 | 83.5 | 未知 |           | 15.8  | 1.94531  |         |
| FAM | 23.6  | 83.5 | 未知 |           | 15.59 | 3.052518 | TBBPA   |
| FAM | 22.14 | 84   | 未知 |           | 15.69 | 2.265768 |         |
| FAM | 25.4  | 81   | 未知 | Caspase-7 | 15.16 | 1        |         |
| FAM | 24.48 | 81   | 未知 |           | 15.42 | 1        | con     |
| FAM | 23.74 | 81   | 未知 |           | 15.39 | 1        |         |
| FAM | 25.36 | 81   | 未知 |           | 15.76 | 0.641713 | GTP+TBB |
| FAM | 24.51 | 81.5 | 未知 |           | 15.65 | 0.870551 | PA      |
| FAM | 23.89 | 81   | 未知 |           | 15.59 | 0.965936 |         |
| FAM | 25.67 | 81   | 未知 |           | 15.32 | 1.079228 | NAC+TBB |
| FAM | 24.22 | 81.5 | 未知 |           | 15.16 | 1        | PA      |
| FAM | 23.57 | 81.5 | 未知 |           | 15.31 | 0.939523 |         |
| FAM | 26.92 | 81   | 未知 |           | 15.8  | 1.840375 |         |
| FAM | 25.44 | 81.5 | 未知 |           | 15.59 | 1.729074 | TBBPA   |
| FAM | 25.48 | 81   | 未知 |           | 15.69 | 2.713209 |         |
| FAM | 21.46 | 82.5 | 未知 | Caspase-8 | 15.16 | 1        |         |
| FAM | 21.8  | 82.5 | 未知 |           | 15.42 | 1        | con     |
| FAM | 21.78 | 82.5 | 未知 |           | 15.39 | 1        |         |
| FAM | 22.46 | 82.5 | 未知 |           | 16.06 | 1.071773 | GTP+TBB |
| FAM | 21.63 | 82.5 | 未知 |           | 15.65 | 0.757858 | PA      |
| FAM | 22.05 | 82.5 | 未知 |           | 15.59 | 1.049717 |         |
| FAM | 22.08 | 82.5 | 未知 |           | 15.32 | 1.375542 | NAC+TBB |
| FAM | 21.53 | 82.5 | 未知 |           | 15.16 | 0.993092 | PA      |
| FAM | 21.66 | 82.5 | 未知 |           | 15.31 | 0.972655 |         |
| FAM | 23.12 | 82.5 | 未知 |           | 15.8  | 2.027919 |         |
| FAM | 23.33 | 82.5 | 未知 |           | 15.59 | 2.566852 | TBBPA   |
| FAM | 23.21 | 82.5 | 未知 |           | 14.89 | 3.810552 |         |
| FAM | 15.16 | 83   | 未知 |           |       | 1        |         |
| FAM | 15.42 | 83   | 未知 |           |       | 1        | con     |
| FAM | 15.39 | 83   | 未知 |           |       | 1        |         |
| FAM | 16.06 | 83   | 未知 |           |       | 1.866066 | GTP+TBB |
| FAM | 15.65 | 83   | 未知 |           |       | 1.172835 | PA      |
| FAM | 15.59 | 83   | 未知 |           |       | 1.148698 |         |
| FAM | 15.32 | 83   | 未知 |           |       | 1.117287 | NAC+TBB |
| FAM | 15.16 | 83   | 未知 |           |       | 0.835088 | PA      |
| FAM | 15.31 | 83   | 未知 |           |       | 0.946058 |         |
| FAM | 15.8  | 83   | 未知 |           |       | 1.558329 |         |
| FAM | 15.59 | 83   | 未知 |           |       | 1.125058 | TBBPA   |
| FAM | 14.89 | 83.5 | 未知 |           |       | 0.707107 |         |

|    |       |       |       |       |
|----|-------|-------|-------|-------|
| 内参 | 17.51 | 17.24 | 17.24 | 17.24 |
|    | 17.4  | 17.09 | 17.09 | 17.09 |
|    | 17.63 | 17.24 | 17.24 | 17.24 |

|       |       |       |       |       |
|-------|-------|-------|-------|-------|
| NF-KB | 33.85 | 31.7  | 33.21 | 30.7  |
|       | 32.63 | 32.26 | 33.59 | 31.26 |
|       | 33.4  | 31.61 | 32.6  | 30.61 |

|     |       |   |          |           |          |
|-----|-------|---|----------|-----------|----------|
| 处理后 | NF-KB | 1 | 3.680751 | 1.2923528 | 7.361501 |
|     |       | 1 | 1.042466 | 0.4146598 | 2.084932 |
|     |       | 1 | 2.639016 | 1.3286858 | 5.278032 |

|      |       |       |       |       |
|------|-------|-------|-------|-------|
| ATF6 | 34.15 | 34.33 | 36.33 | 36.44 |
|      | 36.93 | 34.76 | 35.47 | 35.35 |
|      | 35.54 | 34.82 | 34.27 | 33.13 |

|  |   |          |           |          |
|--|---|----------|-----------|----------|
|  | 1 | 0.732043 | 0.1830107 | 0.169576 |
|  | 1 | 3.630077 | 2.2191389 | 2.411616 |
|  | 1 | 1.257013 | 1.8403753 | 4.055838 |

| 孔位  | 通道  | CT值   | TM值  | 类型 | 目的基因  | 管家基因           |
|-----|-----|-------|------|----|-------|----------------|
| A01 | FAM | 35.19 | 78   | 未知 | CAS7  | 35.19 19.2     |
| A02 | FAM | 34.85 | 86.5 | 未知 |       | 34.85 19.2     |
| A03 | FAM | 34.18 | 77   | 未知 |       | 34.18 19.2     |
| A04 | FAM | 33.02 | 77   | 未知 |       | 34.02 18.37    |
| A05 | FAM | 34.13 | 76.5 | 未知 |       | 34.13 18.37    |
| A06 | FAM | 32.71 | 77.5 | 未知 |       | 33.71 18.37    |
| A07 | FAM | 34.53 | 76.5 | 未知 |       | 34.53 20.31    |
| A08 | FAM | 34.19 | 76.5 | 未知 |       | 34.19 20.31    |
| A09 | FAM | 33.13 | 77   | 未知 |       | 34.13 20.31    |
| A10 | FAM | 33.37 | 76.5 | 未知 |       | 33.37 18.39333 |
| A11 | FAM | 32.98 | 77   | 未知 |       | 32.98 18.39333 |
| A12 | FAM | 32.77 | 77   | 未知 |       | 32.77 18.39333 |
| B01 | FAM | 35.4  | 74   | 未知 | tnf-a | 34.52 19.2     |
| B02 | FAM | 34.76 | 77   | 未知 |       | 34.8 19.2      |
| B03 | FAM | 0     | 0    | 未知 |       | 35.08 19.2     |
| B04 | FAM | 0     | 0    | 未知 |       | 34.6 18.37     |
| B05 | FAM | 35.45 | 74.5 | 未知 |       | 35.02 18.37    |
| B06 | FAM | 0     | 0    | 未知 |       | 33.51 18.37    |
| B07 | FAM | 35.92 | 0    | 未知 |       | 34.36 20.31    |
| B08 | FAM | 0     | 0    | 未知 |       | 34.39 20.31    |
| B09 | FAM | 35.88 | 0    | 未知 |       | 34.6 20.31     |
| B10 | FAM | 0     | 0    | 未知 |       | 32.7 18.39333  |
| B11 | FAM | 34.85 | 74   | 未知 |       | 33.55 18.39333 |
| B12 | FAM | 35.25 | 77   | 未知 |       | 33.26 18.39333 |
| C01 | FAM | 0     | 0    | 未知 | BCL-2 | 33.07 19.2     |
| C02 | FAM | 35.5  | 78   | 未知 |       | 32.29 19.2     |
| C03 | FAM | 0     | 0    | 未知 |       | 34.52 19.2     |
| C04 | FAM | 0     | 0    | 未知 |       | 33.23 18.37    |
| C05 | FAM | 0     | 0    | 未知 |       | 32.41 18.37    |
| C06 | FAM | 0     | 0    | 未知 |       | 33.07 18.37    |
| C07 | FAM | 0     | 0    | 未知 |       | 34.47 20.31    |
| C08 | FAM | 0     | 0    | 未知 |       | 33.96 20.31    |
| C09 | FAM | 0     | 0    | 未知 |       | 33.55 20.31    |
| C10 | FAM | 0     | 0    | 未知 |       | 32.03 18.39333 |
| C11 | FAM | 0     | 0    | 未知 |       | 33.1 18.39333  |
| C12 | FAM | 0     | 0    | 未知 |       | 32.01 18.39333 |

|     |     |       |       |       |
|-----|-----|-------|-------|-------|
| D01 | FAM | 19.25 | 84 未知 | GAPDH |
| D02 | FAM | 19.19 | 84 未知 |       |
| D03 | FAM | 19.16 | 84 未知 |       |
| D04 | FAM | 18.56 | 84 未知 |       |
| D05 | FAM | 18.17 | 84 未知 |       |
| D06 | FAM | 18.38 | 84 未知 |       |
| D07 | FAM | 20.33 | 84 未知 |       |
| D08 | FAM | 20.33 | 84 未知 |       |
| D09 | FAM | 20.27 | 84 未知 |       |
| D10 | FAM | 22.47 | 84 未知 |       |
| D11 | FAM | 22.5  | 84 未知 |       |
| D12 | FAM | 22.21 | 84 未知 |       |

| 孔位  | 通道  | CT值   |                    | CT值   |       |      |
|-----|-----|-------|--------------------|-------|-------|------|
| E01 | FAM | 31.36 | 20.51 cas9         | 31.36 | 21.73 |      |
| E02 | FAM | 31.34 | 20.95              | 31.34 | 21.89 |      |
| E03 | FAM | 31.48 | 20.7               | 31.48 | 21.83 |      |
| E04 | FAM | 30.16 | 22.05              | 30.16 | 20.73 |      |
| E05 | FAM | 30.15 | 22.16              | 30.15 | 20.89 |      |
| E06 | FAM | 29.01 | 22.06              | 31.01 | 20.83 |      |
| E07 | FAM | 31.44 | 21.02              | 31.44 | 20.73 |      |
| E08 | FAM | 32.22 | 20.57              | 32.22 | 21.89 |      |
| E09 | FAM | 31.3  | 21.08              | 31.3  | 20.83 |      |
| E10 | FAM | 30.17 | 21.63              | 30.17 | 19.04 |      |
| E11 | FAM | 31.11 | 21.95              | 31.11 | 19.33 |      |
| E12 | FAM | 30.55 | 21.81              | 30.55 | 19.29 |      |
| F01 | FAM | 27.76 | 20.51 IL-1 $\beta$ | 27.76 | 21.73 | 6.03 |
| F02 | FAM | 28.05 | 20.95              | 28.05 | 21.89 | 6.16 |
| F03 | FAM | 27.77 | 20.7               | 27.77 | 21.83 | 5.94 |
| F04 | FAM | 26.99 | 22.05              | 26.99 | 20.73 | 6.03 |
| F05 | FAM | 27.75 | 22.16              | 27.75 | 20.89 | 6.16 |
| F06 | FAM | 27.39 | 22.06              | 27.39 | 20.83 | 5.94 |
| F07 | FAM | 30.23 | 21.02              | 30.23 | 20.73 | 6.03 |
| F08 | FAM | 30.28 | 20.57              | 30.28 | 20.89 | 6.16 |
| F09 | FAM | 30.04 | 21.08              | 30.04 | 20.83 | 5.94 |
| F10 | FAM | 29.26 | 21.63              | 29.26 | 19.04 | 6.03 |
| F11 | FAM | 29.08 | 21.95              | 29.08 | 19.33 | 6.16 |
| F12 | FAM | 29.28 | 21.81              | 29.28 | 19.29 | 5.94 |
| G01 | FAM |       | 20.51 IKB          | 25.79 | 25.27 | 0.52 |
| G02 | FAM |       | 20.95              | 25.88 | 25.04 | 0.84 |
| G03 | FAM |       | 20.7               | 25.51 | 24.66 | 0.85 |
| G04 | FAM |       | 22.05              | 29.21 | 25.27 | 4.06 |
| G05 | FAM |       | 22.16              | 27.49 | 25.04 | 3.99 |
| G06 | FAM |       | 22.06              | 27.53 | 25.66 | 3.68 |
| G07 | FAM |       | 21.02              | 28.6  | 25.63 | 4.06 |
| G08 | FAM |       | 20.57              | 28.7  | 24.83 | 3.99 |
| G09 | FAM |       | 21.08              | 28.86 | 26.12 | 3.68 |
| G10 | FAM |       | 21.63              | 26.4  | 25.04 | 4.06 |
| G11 | FAM |       | 21.95              | 26.48 | 25.33 | 3.99 |
| G12 | FAM |       | 21.81              | 26.58 | 25.29 | 3.68 |
| H01 | FAM | 21.73 | 20.51 GAPDH        | 21.73 | 21.73 | 0    |
| H02 | FAM | 21.89 | 20.95              | 21.89 | 21.89 |      |
| H03 | FAM | 21.83 | 20.7               | 21.83 | 21.83 |      |
| H04 | FAM | 25.27 | 22.05              | 25.27 | 25.27 |      |
| H05 | FAM | 25.04 | 22.16              | 25.04 | 25.04 |      |
| H06 | FAM | 25.66 | 22.06              | 25.66 | 25.66 |      |
| H07 | FAM | 25.63 | 21.02              | 25.63 | 25.63 |      |

|     |     |       |       |       |       |
|-----|-----|-------|-------|-------|-------|
| H08 | FAM | 25.83 | 20.57 | 25.83 | 25.83 |
| H09 | FAM | 26.12 | 21.08 | 26.12 | 26.12 |
| H10 | FAM | 25.04 | 21.63 | 25.04 | 25.04 |
| H11 | FAM | 24.33 | 21.95 | 24.33 | 24.33 |
| H12 | FAM | 24.29 | 21.81 | 24.29 | 24.29 |

| 孔位  | 通道  | CT值 | TM值  | 类型   | 目的基因  | 样本名称  | 管家基因  |
|-----|-----|-----|------|------|-------|-------|-------|
| H01 | FAM |     |      | 0 未知 | 34.55 | 21.93 | 12.62 |
| H02 | FAM |     | 80.5 | 未知   | 35.04 | 21.95 | 13.09 |
| H03 | FAM |     | 80.5 | 未知   | 34.98 | 21.81 | 13.17 |
| H04 | FAM |     | 80.5 | 未知   | 32.49 | 20.07 | 12.62 |
| H05 | FAM |     | 80.5 | 未知   | 32.84 | 20.55 | 13.09 |
| H06 | FAM |     | 80.5 | 未知   | 31.85 | 20.7  | 13.17 |
| H07 | FAM |     | 81   | 未知   | 34.94 | 21.02 | 12.62 |
| H08 | FAM |     | 0    | 未知   | 34.92 | 20.57 | 13.09 |
| H09 | FAM |     | 81   | 未知   | 34.9  | 20.08 | 13.17 |
| H10 | FAM |     | 81   | 未知   | 34.15 | 19.95 | 12.62 |
| H11 | FAM |     | 0    | 未知   | 34.35 | 19.7  | 13.09 |
| H12 | FAM |     | 81   | 未知   | 34.6  | 19.02 | 13.17 |

|     |     |       |      |    |       |       |       |
|-----|-----|-------|------|----|-------|-------|-------|
| C01 | FAM | 21.15 | 82   | 未知 | GRP94 | 21.15 | 20.51 |
| C02 | FAM | 20.87 | 81.5 | 未知 |       | 20.87 | 20.95 |
| C03 | FAM | 20.9  | 81.5 | 未知 |       | 20.9  | 20.7  |
| C04 | FAM | 22.59 | 81.5 | 未知 |       | 22.59 | 22.05 |
| C05 | FAM | 22.49 | 81.5 | 未知 |       | 22.49 | 22.16 |
| C06 | FAM | 22.38 | 81.5 | 未知 |       | 22.38 | 22.06 |
| C07 | FAM | 21.56 | 81.5 | 未知 |       | 21.56 | 21.02 |
| C08 | FAM | 21.68 | 81.5 | 未知 |       | 21.68 | 20.57 |
| C09 | FAM | 21.44 | 81.5 | 未知 |       | 21.44 | 21.08 |
| C10 | FAM | 23.13 | 81.5 | 未知 |       | 23.13 | 21.63 |
| C11 | FAM | 23    | 0    | 未知 |       | 23    | 21.95 |
| C12 | FAM | 22.97 | 81.5 | 未知 |       | 22.97 | 21.81 |
| D01 | FAM | 25.94 | 84   | 未知 | CHOP  | 25.94 | 20.51 |
| D02 | FAM | 25.37 | 84   | 未知 |       | 25.37 | 20.95 |
| D03 | FAM | 25.56 | 84   | 未知 |       | 25.56 | 20.7  |
| D04 | FAM | 27.31 | 84.5 | 未知 |       | 27.31 | 22.05 |
| D05 | FAM | 27.21 | 84.5 | 未知 |       | 27.21 | 22.16 |
| D06 | FAM | 27.4  | 84   | 未知 |       | 27.4  | 22.06 |
| D07 | FAM | 25.77 | 84   | 未知 |       | 25.77 | 21.02 |
| D08 | FAM | 25.12 | 84   | 未知 |       | 25.12 | 20.57 |
| D09 | FAM | 25.57 | 84   | 未知 |       | 25.57 | 21.08 |
| D10 | FAM | 28    | 0    | 未知 |       | 28    | 21.63 |
| D11 | FAM | 27.63 | 84   | 未知 |       | 27.63 | 21.95 |
| D12 | FAM | 27.89 | 84   | 未知 |       | 27.89 | 21.81 |
| E01 | FAM | 26.69 | 85.5 | 未知 | ATF6  | 26.69 | 20.51 |
| E02 | FAM | 25.92 | 85.5 | 未知 |       | 25.92 | 20.95 |
| E03 | FAM | 25.97 | 85.5 | 未知 |       | 25.97 | 20.7  |
| E04 | FAM | 28.39 | 85.5 | 未知 |       | 28.39 | 22.05 |
| E05 | FAM | 27.97 | 85.5 | 未知 |       | 27.97 | 22.16 |
| E06 | FAM | 28.69 | 85.5 | 未知 |       | 28.69 | 22.06 |
| E07 | FAM | 26.28 | 85.5 | 未知 |       | 26.28 | 21.02 |
| E08 | FAM | 26.29 | 85.5 | 未知 |       | 26.29 | 20.57 |
| E09 | FAM | 26.75 | 85.5 | 未知 |       | 26.75 | 21.08 |
| E10 | FAM | 27.61 | 85.5 | 未知 |       | 27.61 | 21.63 |
| E11 | FAM | 27.51 | 85.5 | 未知 |       | 27.51 | 21.95 |
| E12 | FAM | 27.58 | 85.5 | 未知 |       | 27.58 | 21.81 |
| F01 | FAM | 23.61 | 82.5 | 未知 | ATF4  | 23.61 | 20.51 |

|     |     |       |         |       |       |       |
|-----|-----|-------|---------|-------|-------|-------|
| F02 | FAM | 23.71 | 82.5 未知 |       | 23.71 | 20.95 |
| F03 | FAM | 22.57 | 82 未知   |       | 22.57 | 20.7  |
| F04 | FAM | 25.75 | 82.5 未知 |       | 25.75 | 22.05 |
| F05 | FAM | 25.57 | 82.5 未知 |       | 25.57 | 22.16 |
| F06 | FAM | 25.85 | 82.5 未知 |       | 25.85 | 22.06 |
| F07 | FAM | 24.35 | 82.5 未知 |       | 24.35 | 21.02 |
| F08 | FAM | 24.41 | 82.5 未知 |       | 24.41 | 20.57 |
| F09 | FAM | 24.44 | 82.5 未知 |       | 24.44 | 21.08 |
| F10 | FAM | 25.22 | 82.5 未知 |       | 25.22 | 21.63 |
| F11 | FAM | 25.44 | 82.5 未知 |       | 25.44 | 21.95 |
| F12 | FAM | 25.68 | 82.5 未知 |       | 25.68 | 21.81 |
| G01 | FAM | 20.51 | 0 未知    |       |       |       |
| G02 | FAM | 20.95 | 0 未知    |       |       |       |
| G03 | FAM | 20.7  | 0 未知    |       |       |       |
| G04 | FAM | 22.05 | 0 未知    |       |       |       |
| G05 | FAM | 22.16 | 0 未知    |       |       |       |
| G06 | FAM | 22.06 | 0 未知    |       |       |       |
| G07 | FAM | 21.02 | 0 未知    |       |       |       |
| G08 | FAM | 20.57 | 0 未知    |       |       |       |
| G09 | FAM | 21.08 | 0 未知    |       |       |       |
| G10 | FAM | 21.63 | 0 未知    |       |       |       |
| G11 | FAM | 21.95 | 0 未知    |       |       |       |
| G12 | FAM | 21.81 | 0 未知    |       |       |       |
| H01 | FAM | 35.95 | 0 未知    | GRP78 | 35.95 | 22.93 |
| H02 | FAM | 35.66 | 80.5 未知 |       | 35.66 | 21.95 |
| H03 | FAM | 35.42 | 80.5 未知 |       | 35.42 | 21.81 |
| H04 | FAM | 34.83 | 0 未知    |       | 34.83 | 20.07 |
| H05 | FAM | 34.56 | 0 未知    |       | 34.56 | 20.95 |
| H06 | FAM | 35.61 | 0 未知    |       | 35.61 | 20.7  |
| H07 | FAM | 35.55 | 81 未知   |       | 35.55 | 21.02 |
| H08 | FAM | 34.71 | 81 未知   |       | 34.71 | 20.57 |
| H09 | FAM | 33.74 | 81 未知   |       | 33.74 | 20.08 |
| H10 | FAM | 34.14 | 81 未知   |       | 34.14 | 19.95 |
| H11 | FAM | 34.79 | 81 未知   |       | 34.79 | 19.7  |
| H12 | FAM | 34.25 | 81 未知   |       | 34.25 | 19.02 |

| 通道  | CT值   | TM值  | 类型 | 目的基因  | 样本名称                 |
|-----|-------|------|----|-------|----------------------|
| FAM | 26.94 | 86.5 | 未知 | Bax   | 26.94 18.54 18.37333 |
| FAM | 26.26 | 86.5 | 未知 |       | 26.26 18.21 18.37333 |
| FAM | 26.14 | 86.5 | 未知 |       | 26.14 18.37 18.37333 |
| FAM | 0     | 0    | 未知 |       | 30.33 20.93 20.72    |
| FAM | 30.76 | 86.5 | 未知 |       | 30.76 20.73 20.72    |
| FAM | 30.08 | 86.5 | 未知 |       | 30.08 20.5 20.72     |
| FAM | 27.38 | 86.5 | 未知 |       | 26.3 19.38 19.35667  |
| FAM | 26.23 | 86.5 | 未知 |       | 26.23 19.29 19.35667 |
| FAM | 26.37 | 86.5 | 未知 |       | 26.37 19.4 19.35667  |
| FAM | 26.74 | 86.5 | 未知 |       | 26.74 20.38 20.36    |
| FAM | 26.76 | 86.5 | 未知 |       | 26.76 20.33 20.36    |
| FAM | 27.75 | 86.5 | 未知 |       | 26.75 20.37 20.36    |
| FAM | 0     | 0    | 未知 | Eif-2 | 18.54                |
| FAM | 0     | 0    | 未知 |       | 18.21                |
| FAM | 28.17 | 82   | 未知 |       | 18.37                |
| FAM | 0     | 0    | 未知 |       | 20.93                |
| FAM | 0     | 0    | 未知 |       | 20.73                |
| FAM | 0     | 0    | 未知 |       | 20.88                |
| FAM | 31.45 | 82.5 | 未知 |       | 19.38                |
| FAM | 29.91 | 82.5 | 未知 |       | 19.29                |
| FAM | 30.65 | 82.5 | 未知 |       | 19.4                 |



|     |       |         |           |       |       |
|-----|-------|---------|-----------|-------|-------|
| FAM | 29.82 | 82 未知   |           |       | 20.38 |
| FAM | 30.58 | 82 未知   |           |       | 20.33 |
| FAM | 28.68 | 82 未知   |           |       | 20.37 |
| FAM | 33.72 | 0 未知    | IRE-1     | 33.72 | 18.54 |
| FAM | 29.65 | 85 未知   |           | 31    | 18.21 |
| FAM | 25.42 | 85.5 未知 |           | 32    | 18.37 |
| FAM | 29.64 | 85.5 未知 |           | 29.64 | 20.93 |
| FAM | 31.33 | 85.5 未知 |           | 29.55 | 20.73 |
| FAM | 29.31 | 85 未知   |           | 29.31 | 20.88 |
| FAM | 25.03 | 85.5 未知 |           | 25.03 | 19.38 |
| FAM | 24.95 | 85.5 未知 |           | 24.95 | 19.29 |
| FAM | 25.13 | 85 未知   |           | 25.13 | 19.4  |
| FAM | 26.41 | 85 未知   |           | 26.41 | 20.38 |
| FAM | 26.68 | 85 未知   |           | 26.68 | 20.33 |
| FAM | 26.12 | 85 未知   |           | 26.12 | 20.37 |
| FAM | 18.54 | 82.5 未知 | $\beta$   |       | 18.54 |
| FAM | 18.21 | 82.5 未知 |           |       | 18.21 |
| FAM | 18.37 | 82.5 未知 |           |       | 18.37 |
| FAM | 20.93 | 82.5 未知 |           |       | 20.93 |
| FAM | 20.73 | 82.5 未知 |           |       | 20.73 |
| FAM | 20.88 | 82.5 未知 |           |       | 20.88 |
| FAM | 19.38 | 82.5 未知 |           |       | 19.38 |
| FAM | 19.29 | 82.5 未知 |           |       | 19.29 |
| FAM | 19.4  | 82.5 未知 |           |       | 19.4  |
| FAM | 20.38 | 82.5 未知 |           |       | 20.38 |
| FAM | 20.33 | 82.5 未知 |           |       | 20.33 |
| FAM | 20.37 | 82.5 未知 |           |       | 20.37 |
| FAM | 27.37 | 81.5 未知 | Caspase12 | 27.37 | 18.54 |
| FAM | 27.32 | 81.5 未知 |           | 27.32 | 18.21 |
| FAM | 27.33 | 81.5 未知 |           | 27.33 | 18.37 |
| FAM | 29.04 | 81.5 未知 |           | 29.04 | 20.93 |
| FAM | 29.07 | 82 未知   |           | 29.07 | 20.73 |
| FAM | 29.08 | 81.5 未知 |           | 29.08 | 20.5  |
| FAM | 27.5  | 82 未知   |           | 27.5  | 19.38 |
| FAM | 27.37 | 82 未知   |           | 27.37 | 19.29 |
| FAM | 27.37 | 82 未知   |           | 27.37 | 19.4  |
| FAM | 28.37 | 81.5 未知 |           | 28.37 | 20.38 |
| FAM | 28.32 | 81.5 未知 |           | 28.32 | 20.33 |
| FAM | 28.28 | 81.5 未知 |           | 28.28 | 20.37 |
| FAM | 30.8  | 84 未知   | PERK      | 26.94 | 18.54 |
| FAM | 30.22 | 84 未知   |           | 26.26 | 18.21 |
| FAM | 30.48 | 83.5 未知 |           | 26.14 | 18.37 |
| FAM | 32.31 | 84 未知   |           | 30.33 | 20.93 |
| FAM | 31.84 | 84 未知   |           | 30.76 | 20.73 |
| FAM | 33.05 | 84 未知   |           | 30.08 | 20.5  |
| FAM | 33.25 | 84 未知   |           | 26.3  | 19.38 |
| FAM | 33.24 | 84 未知   |           | 26.23 | 19.29 |
| FAM | 32.26 | 84 未知   |           | 26.37 | 19.4  |
| FAM | 33.97 | 84 未知   |           | 26.74 | 20.38 |
| FAM | 32.74 | 84 未知   |           | 26.76 | 20.33 |
| FAM | 36.49 | 84.5 未知 |           | 26.75 | 20.37 |
| FAM | 27.26 | 87 未知   | Caspase3  | 26.94 | 18.54 |
| FAM | 26.79 | 87 未知   |           | 26.26 | 18.21 |
| FAM | 26.94 | 87 未知   |           | 26.14 | 18.37 |
| FAM | 29.48 | 87 未知   |           | 30.33 | 20.93 |
| FAM | 29.26 | 87 未知   |           | 30.76 | 20.73 |
| FAM | 29.5  | 87 未知   |           | 30.08 | 20.5  |
| FAM | 26.49 | 87 未知   |           | 26.3  | 19.38 |

|     |       |         |       |       |
|-----|-------|---------|-------|-------|
| FAM | 26.37 | 87 未知   | 26.23 | 19.29 |
| FAM | 27.07 | 87.5 未知 | 26.37 | 19.4  |
| FAM | 27.69 | 87 未知   | 26.74 | 20.38 |
| FAM | 27.61 | 87 未知   | 26.76 | 20.33 |
| FAM | 27.37 | 87.5 未知 | 26.75 | 20.37 |
| FAM | 0     | 0 未知    | 31.6  | 18.54 |
| FAM | 31.72 | 82 未知   | 31.72 | 18.21 |
| FAM | 31.57 | 82 未知   | 31.57 | 18.37 |
| FAM | 32.26 | 82.5 未知 | 32.26 | 20.93 |
| FAM | 32.1  | 82.5 未知 | 32.1  | 20.73 |
| FAM | 37.74 | 0 未知    | 32    | 20.5  |
| FAM | 31.21 | 82.5 未知 | 31.21 | 19.38 |
| FAM | 31.06 | 82.5 未知 | 31.06 | 19.29 |
| FAM | 30.98 | 82.5 未知 | 30.98 | 19.4  |
| FAM | 31    | 82.5 未知 | 32    | 20.38 |
| FAM | 31.9  | 82.5 未知 | 31.9  | 20.33 |
| FAM | 32.09 | 82.5 未知 | 32.09 | 20.37 |

IL-6

|             |          |             |             |         |
|-------------|----------|-------------|-------------|---------|
| 15.99       | 1.54E-05 | 2.19189E-05 | 0.700989005 |         |
| 15.65       | 1.94E-05 |             | 0.887281456 | con     |
| 14.98       | 3.09E-05 |             | 1.411729539 |         |
| 15.65       | 1.94E-05 | 2.19189E-05 | 0.887281456 |         |
| 15.76       | 1.8E-05  |             | 0.822144404 | GTP     |
| 15.34       | 2.41E-05 |             | 1.099969653 |         |
| 14.22       | 5.24E-05 | 2.19189E-05 | 2.390750739 | GTP+TBB |
| 13.88       | 6.63E-05 |             | 3.026108512 | PA      |
| 13.82       | 6.91E-05 |             | 3.154614512 |         |
| 14.97666667 | 3.1E-05  | 2.19189E-05 | 1.414995098 |         |
| 14.58666667 | 4.06E-05 |             | 1.854200243 | TBBPA   |
| 14.37666667 | 4.7E-05  |             | 2.144731511 |         |
| 15.32       | 2.44E-05 | 2.03877E-05 | 1.199091961 |         |
| 15.6        | 2.01E-05 |             | 0.987561368 | con     |
| 15.88       | 1.66E-05 |             | 0.813346671 |         |
| 16.23       | 1.3E-05  | 2.03877E-05 | 0.638138865 |         |
| 16.65       | 9.72E-06 |             | 0.476960701 | GTP     |
| 15.14       | 2.77E-05 |             | 1.358431959 |         |
| 14.05       | 5.9E-05  | 2.03877E-05 | 2.891748945 | GTP+TBB |
| 14.08       | 5.77E-05 |             | 2.832237612 | PA      |
| 14.29       | 4.99E-05 |             | 2.448574864 |         |
| 14.30666667 | 4.93E-05 | 2.03877E-05 | 2.420450582 |         |
| 15.15666667 | 2.74E-05 |             | 1.342829037 | TBBPA   |
| 14.86666667 | 3.35E-05 |             | 1.641796867 |         |
| 13.87       | 6.68E-05 | 6.86416E-05 | 0.973030104 |         |
| 13.09       | 0.000115 |             | 1.670820032 | con     |
| 15.32       | 2.44E-05 |             | 0.356149864 |         |
| 14.86       | 3.36E-05 | 6.86416E-05 | 0.489899032 |         |
| 14.04       | 5.94E-05 |             | 0.864870686 | GTP     |
| 14.7        | 3.76E-05 |             | 0.547357887 |         |
| 14.16       | 5.46E-05 | 6.86416E-05 | 0.795843325 | GTP+TBB |
| 13.65       | 7.78E-05 |             | 1.133320843 | PA      |
| 13.24       | 0.000103 |             | 1.505827327 |         |
| 13.63666667 | 7.85E-05 | 6.86416E-05 | 1.143843501 |         |
| 14.70666667 | 3.74E-05 |             | 0.544834392 | TBBPA   |
| 13.61666667 | 7.96E-05 |             | 1.159810962 |         |

con

GTP

GTP+TBB  
PA

TBBPA

目的基因

1  
1 con  
1  
0. 870550563  
0. 876605721 GTP  
1. 443929196  
2. 114036081 GTP+TBB  
1. 840375301 PA  
1. 765405993  
2. 828427125  
5. 028053498 TBBPA  
3. 052518418  
1  
1 con  
1  
1. 172834949  
1. 624504793 GTP  
1. 536875181  
11. 08087574 GTP+TBB  
9. 382679594 PA  
9. 646462622  
18. 25221945  
12. 04197398 TBBPA  
16. 56423878  
1  
1 con  
1  
0. 920187651  
0. 343885455 GTP  
0. 285190929  
0. 469761375 GTP+TBB  
0. 920187651 PA  
0. 52123288  
0. 153893052  
0. 139660892 TBBPA  
0. 190782401

con

GTP

GTP+TBB

GTP+TBB  
PA

TBBPA

对照样本

1  
1 con  
1  
0.870550563  
0.574349177 GTP  
0.246558176  
2.462288827 GTP+TBB  
2.394957409 PA  
3.138336392  
2.989698497  
2.948538435 TBBPA  
5.314743256

0.64 1  
-0.08 1 con  
0.2 1  
0.64 0.933033  
-0.08 1.328686 GTP  
0.2 1.086735  
0.64 0.933033  
-0.08 2.281527 GTP+TBBPA  
0.2 1.117287  
0.64 1.815038  
-0.08 2.188587 TBBPA  
0.2 1.94531  
5.43 1  
4.42 1 con  
4.86 1  
5.43 0.888843  
4.42 1.547565 GTP  
4.86 1.394744  
5.43 0.624165  
4.42 1.094294 GTP+TBBPA  
4.86 0.773782  
5.43 1.918528  
4.42 2.394957 TBBPA  
4.86 2.329467  
6.18 1  
4.97 1 con  
5.27 1  
6.18 1.117287  
4.97 1.79005 GTP  
5.27 2.566852  
6.18 0.528509  
4.97 1.681793 GTP+TBBPA  
5.27 1.319508  
6.18 0.870551  
4.97 1.505247 TBBPA  
5.27 1.414214  
3.1 1

|       |          |           |
|-------|----------|-----------|
| 2.76  | 1        | con       |
| 1.87  | 1        |           |
| 3.1   | 1.515717 |           |
| 2.76  | 1.569168 | GTP       |
| 1.87  | 3.784231 |           |
| 3.1   | 1.172835 |           |
| 2.76  | 2.114036 | GTP+TBBPA |
| 1.87  | 2.80889  |           |
| 3.1   | 1.404445 |           |
| 2.76  | 1.658639 | TBBPA     |
| 1.87  | 4        |           |
|       | 1        |           |
|       | 1        | con       |
|       | 1        |           |
|       | 1        |           |
|       | 1        | GTP       |
|       | 1        |           |
|       | 1        | GTP+TBBPA |
|       | 1        |           |
|       | 1        | TBBPA     |
|       | 1        |           |
| 13.02 | 1        |           |
| 13.71 | 1        | con       |
| 13.61 | 1        |           |
| 13.02 | 3.340352 |           |
| 13.71 | 0.933033 | GTP       |
| 13.61 | 2.462289 |           |
| 13.02 | 2.8481   |           |
| 13.71 | 1.347234 | GTP+TBBPA |
| 13.61 | 1.035265 |           |
| 13.02 | 2.250117 |           |
| 13.71 | 2.602684 | TBBPA     |
| 13.61 | 3.07375  |           |

| ▲CT         | 通道基因     |             |             |          | 目的基因     |     |       |
|-------------|----------|-------------|-------------|----------|----------|-----|-------|
| 8.566666667 | 0.002637 | 0.003818291 | 0.69072844  | 1        | 0.272103 | Bax | 26.94 |
| 7.886666667 | 0.004225 |             | 1.106643494 |          |          |     | 26.26 |
| 7.766666667 | 0.004592 |             | 1.202628066 |          |          |     | 26.14 |
| 9.61        | 0.00128  | 0.003818291 | 0.335144973 | 0.327489 | 0.075189 |     | 30.33 |
| 10.04       | 0.00095  |             | 0.248765306 |          |          |     | 30.76 |
| 9.36        | 0.001522 |             | 0.398556786 |          |          |     | 30.08 |
| 6.943333333 | 0.008125 | 0.003818291 | 2.12803793  | 2.129708 | 0.103304 |     | 26.3  |
| 6.873333333 | 0.008529 |             | 2.233836918 |          |          |     | 26.23 |
| 7.013333333 | 0.007741 |             | 2.027249793 |          |          |     | 26.37 |
| 6.38        | 0.012007 | 0.003818291 | 3.144557897 | 3.122887 | 0.021646 |     | 26.74 |
| 6.4         | 0.011842 |             | 3.10126584  |          |          |     | 26.76 |
| 6.39        | 0.011924 |             | 3.122836849 |          |          |     | 26.75 |
| -18.54      | -0.16667 | 1.122462048 |             |          |          |     |       |
| -18.21      | 0.163333 | 0.892959511 | con         |          |          |     |       |
| -18.37      | 0.003333 | 0.997692177 |             |          |          |     |       |
| -20.93      | -2.55667 | 5.883467457 |             |          |          |     |       |
| -20.73      | -2.35667 | 5.121855909 | GTP         |          |          |     |       |
| -20.88      | -2.50667 | 5.683054957 |             |          |          |     |       |
| -19.38      | -1.00667 | 2.009263349 |             |          |          |     |       |
| -19.29      | -0.91667 | 1.887748625 | GTP+TBBPA   |          |          |     |       |
| -19.4       | -1.02667 | 2.03731162  |             |          |          |     |       |

|        |          |             |           |
|--------|----------|-------------|-----------|
| -20.38 | -2.00667 | 4.018526698 |           |
| -20.33 | -1.95667 | 3.881640926 | TBBPA     |
| -20.37 | -1.99667 | 3.990768706 |           |
| 15.18  | 1.313333 | 0.402390086 |           |
| 12.79  | -1.07667 | 2.109157259 | con       |
| 13.63  | -0.23667 | 1.178267139 |           |
| 8.71   | -5.15667 | 35.67067637 |           |
| 8.82   | -5.04667 | 33.05202288 | GTP       |
| 8.43   | -5.43667 | 43.31115277 |           |
| 5.65   | -8.21667 | 297.4836703 |           |
| 5.66   | -8.20667 | 295.4288005 | GTP+TBBPA |
| 5.73   | -8.13667 | 281.436701  |           |
| 6.03   | -7.83667 | 228.5976348 |           |
| 6.35   | -7.51667 | 183.1226794 | TBBPA     |
| 5.75   | -8.11667 | 277.5620788 |           |
| -18.54 | -0.16667 | 1.122462048 |           |
| -18.21 | 0.163333 | 0.892959511 | con       |
| -18.37 | 0.003333 | 0.997692177 |           |
| -20.93 | -0.08333 | 1.059463094 |           |
| -20.73 | 0.116667 | 0.922316194 | GTP       |
| -20.88 | -0.03333 | 1.023373892 |           |
| -19.38 | -0.02333 | 1.016304932 |           |
| -19.29 | 0.066667 | 0.954841604 | GTP+TBBPA |
| -19.4  | -0.04333 | 1.03049202  |           |
| -20.38 | -0.02    | 1.01395948  |           |
| -20.33 | 0.03     | 0.979420298 | TBBPA     |
| -20.37 | -0.01    | 1.00695555  |           |
| 8.83   | -0.13667 | 1.099362113 |           |
| 9.11   | 0.143333 | 0.905424761 | con       |
| 8.96   | -0.00667 | 1.004631674 |           |
| 8.11   | -0.85667 | 1.810849523 |           |
| 8.34   | -0.62667 | 1.543993487 | GTP       |
| 8.58   | -0.38667 | 1.307369247 |           |
| 8.12   | -0.84667 | 1.798341071 |           |
| 8.08   | -0.88667 | 1.84889932  | GTP+TBBPA |
| 7.97   | -0.99667 | 1.995384353 |           |
| 7.99   | -0.97667 | 1.967913307 |           |
| 7.99   | -0.97667 | 1.967913307 | TBBPA     |
| 7.91   | -1.05667 | 2.080119868 |           |
| 8.4    | 0.326667 | 0.797376688 |           |
| 8.05   | -0.02333 | 1.016304932 | con       |
| 7.77   | -0.30333 | 1.23399225  |           |
| 9.4    | 1.326667 | 0.398688344 |           |
| 10.03  | 1.956667 | 0.257623005 | GTP       |
| 9.58   | 1.506667 | 0.351923396 |           |
| 6.92   | -1.15333 | 2.224272172 |           |
| 6.94   | -1.13333 | 2.193649959 | GTP+TBBPA |
| 6.97   | -1.10333 | 2.148505296 |           |
| 6.36   | -1.71333 | 3.279175994 |           |
| 6.43   | -1.64333 | 3.123867654 | TBBPA     |
| 6.38   | -1.69333 | 3.234030609 |           |
| 8.4    | 0.326667 | 0.797376688 |           |
| 8.05   | -0.02333 | 1.016304932 | con       |
| 7.77   | -0.30333 | 1.23399225  |           |
| 9.4    | 1.326667 | 0.398688344 |           |
| 10.03  | 1.956667 | 0.257623005 | GTP       |
| 9.58   | 1.506667 | 0.351923396 |           |
| 6.92   | -1.15333 | 2.224272172 |           |

|       |          |             |           |
|-------|----------|-------------|-----------|
| 6.94  | -1.13333 | 2.193649959 | GTP+TBBPA |
| 6.97  | -1.10333 | 2.148505296 |           |
| 6.36  | -1.71333 | 3.279175994 |           |
| 6.43  | -1.64333 | 3.123867654 | TBBPA     |
| 6.38  | -1.69333 | 3.234030609 |           |
| 13.06 | -0.19667 | 1.146047362 |           |
| 13.51 | 0.253333 | 0.838955775 | con       |
| 13.2  | -0.05667 | 1.040059934 |           |
| 11.33 | -1.92667 | 3.801757911 |           |
| 11.37 | -1.88667 | 3.697798641 | GTP       |
| 11.5  | -1.75667 | 3.379164695 |           |
| 11.83 | -1.42667 | 2.688248799 |           |
| 11.77 | -1.48667 | 2.80240733  | GTP+TBBPA |
| 11.58 | -1.67667 | 3.196884599 |           |
| 11.62 | -1.63667 | 3.109465621 |           |
| 11.57 | -1.68667 | 3.21912069  | TBBPA     |
| 11.72 | -1.53667 | 2.901234011 |           |









| 样本名称  | ▲CT   | ▲▲CT         | 通道基因        |
|-------|-------|--------------|-------------|
| 18.54 | 8.4   | 0.32666667   | 0.797376688 |
| 18.21 | 8.05  | -0.023333333 | 1.016304932 |
| 18.37 | 7.77  | -0.303333333 | 1.23399225  |
| 20.93 | 9.4   | 1.326666667  | 0.398688344 |
| 20.73 | 10.03 | 1.956666667  | 0.257623005 |
| 20.5  | 9.58  | 1.506666667  | 0.351923396 |
| 19.38 | 6.92  | -1.153333333 | 2.224272172 |
| 19.29 | 6.94  | -1.133333333 | 2.193649959 |
| 19.4  | 6.97  | -1.103333333 | 2.148505296 |
| 20.38 | 6.36  | -1.713333333 | 3.279175994 |
| 20.33 | 6.43  | -1.643333333 | 3.123867654 |
| 20.37 | 6.38  | -1.693333333 | 3.234030609 |





CAT gastric tissue

|   | 1     | 2     | 3     | 4     |
|---|-------|-------|-------|-------|
| A | 0.599 | 0.591 | 0.59  | 0.586 |
| B | 0.645 | 0.664 | 0.669 | 0.668 |
| C | 0.189 | 0.185 | 0.191 | 0.188 |
| D | 0.215 | 0.223 | 0.219 | 0.22  |
| E | 0.148 | 0.14  | 0.129 | 0.124 |
| F | 0.246 | 0.252 | 0.255 | 0.253 |
| G | 0.822 | 0.833 | 0.843 | 0.836 |
| H | 0.659 | 0.606 | 0.562 | 0.612 |

| C组          | TBA       | CHA       | T+CHA     |
|-------------|-----------|-----------|-----------|
| 0.329       | 0.429     | 0.512     | 0.489     |
| 0.347       | 0.441     | 0.508     | 0.506     |
| 0.347       | 0.445     | 0.513     | 0.508     |
| 0.344       | 0.442     | 0.51      | 0.513     |
| 0.341       | 0.441     | 0.513     | 0.504     |
| 0.354       | 0.443     | 0.513     | 0.505     |
|             |           |           |           |
| 1.515949726 | 1.461573  | 1.8598039 | 0.6827519 |
| 1.520747035 | 1.5089388 | 2.1814241 | 0.6915052 |
| 1.544733581 | 1.5157054 | 2.1814241 | 0.704635  |
| 1.5543282   | 1.5292385 | 2.2093911 | 0.6783753 |
| 1.563922818 | 1.5292385 | 2.1534572 | 0.7133882 |
| 1.496760489 | 1.5089388 | 2.1394737 | 0.704635  |

| c     | 20    | 40    | 60    |
|-------|-------|-------|-------|
| 0.626 | 0.518 | 0.822 | 0.659 |
| 0.641 | 0.522 | 0.833 | 0.606 |
| 0.641 | 0.522 | 0.843 | 0.562 |
| 0.639 | 0.521 | 0.836 | 0.612 |
| 0.637 | 0.524 | 0.831 | 0.545 |
| 0.648 | 0.541 | 0.859 | 0.538 |

1. 515949726

T-AOC gastric tissue

| T-AOC测定组 | C   | 0.099 | 0.134 | 0.124 |
|----------|-----|-------|-------|-------|
|          | T   | 0.083 | 0.087 | 0.084 |
|          | CHA | 0.076 | 0.082 | 0.08  |
|          | T+C | 0.068 | 0.058 | 0.074 |

| T-AOC对照组 | C | 0.078 | 0.072 | 0.056 |
|----------|---|-------|-------|-------|
|----------|---|-------|-------|-------|

1-AOC gastric tissue

|     |       |       |       |
|-----|-------|-------|-------|
| T   | 0.057 | 0.061 | 0.053 |
| CHA | 0.048 | 0.044 | 0.043 |
| T+C | 0.049 | 0.049 | 0.047 |

MDA gastric tissue

|          |       |       |       |
|----------|-------|-------|-------|
| MDA测定孔 C | 0.069 | 0.256 | 0.061 |
| T        | 0.054 | 0.091 | 0.082 |
| T+C      | 0.091 | 0.134 | 0.108 |
| CHA      | 0.154 | 0.062 | 0.056 |
| 空白孔      | 0.053 | 0.051 | 0.052 |
| 标准孔      | 0.092 | 0.076 | 0.076 |
| 对照孔      | 0.05  | 0.07  | 0.06  |

gastric tissue GSH

|   |        |       |        |          |
|---|--------|-------|--------|----------|
|   |        |       |        |          |
|   |        |       |        |          |
|   | C组     | TBA组  | GTP组   | GTP+TBA组 |
| W | 0.1528 | 0.149 | 0.1    | 0.105    |
|   | 0.157  | 0.136 | 0.111  | 0.122    |
|   | 0.1514 | 0.15  | 0.1228 | 0.102    |
|   | 0.158  | 0.143 | 0.109  | 0.103    |
|   | 0.159  | 0.13  | 0.108  | 0.115    |
|   | 空白     | 标准    |        |          |
|   | 0.061  | 0.099 |        |          |
|   | 0.06   | 0.118 |        |          |

SOD

|   |       |       |       |
|---|-------|-------|-------|
|   | C组    | TBA组  | GTP组  |
| W | 0.09  | 0.068 | 0.063 |
|   | 0.089 | 0.072 | 0.064 |
|   | 0.102 | 0.092 | 0.068 |
|   | 0.089 | 0.081 | 0.088 |
|   | 0.093 | 0.088 | 0.068 |



|       |       |       |       |       |       |       |
|-------|-------|-------|-------|-------|-------|-------|
| 5     | 6     | 7     | 8     | 9     | 10    | 11    |
| 0.596 | 0.591 | 0.329 | 0.347 | 0.347 | 0.344 | 0.341 |
| 0.667 | 0.666 | 0.429 | 0.441 | 0.445 | 0.442 | 0.441 |
| 0.185 | 0.182 | 0.489 | 0.506 | 0.508 | 0.513 | 0.504 |
| 0.225 | 0.222 | 0.512 | 0.508 | 0.513 | 0.51  | 0.513 |
| 0.127 | 0.125 | 0.626 | 0.641 | 0.641 | 0.639 | 0.637 |
| 0.255 | 0.257 | 0.518 | 0.522 | 0.522 | 0.521 | 0.524 |
| 0.831 | 0.859 | 0.054 | 0.054 | 0.053 | 0.054 | 0.054 |
| 0.545 | 0.538 | 0.067 | 0.077 | 0.063 | 0.061 | 0.055 |

|  |       |  |
|--|-------|--|
|  | 对照    |  |
|  | 0.645 |  |
|  | 0.664 |  |
|  | 0.669 |  |
|  | 0.668 |  |
|  | 0.667 |  |
|  | 0.666 |  |
|  |       |  |
|  |       |  |
|  |       |  |
|  |       |  |
|  |       |  |
|  |       |  |
|  |       |  |

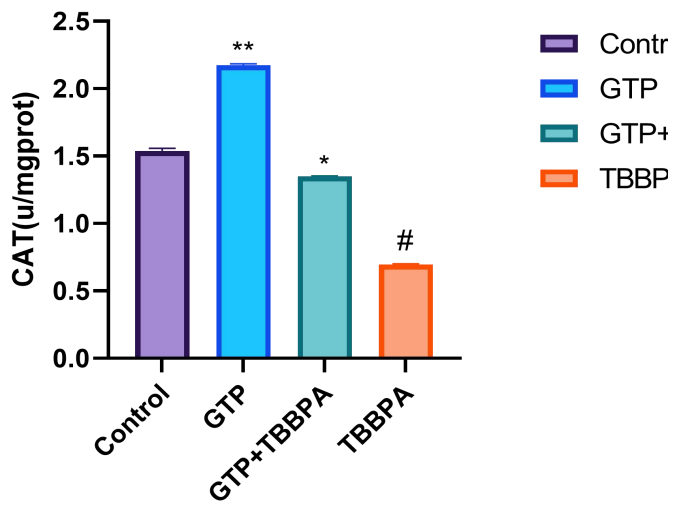

|       |       |       |
|-------|-------|-------|
| 0.113 | 0.111 | 0.122 |
| 0.084 | 0.083 | 0.083 |
| 0.072 | 0.067 | 0.079 |
| 0.07  | 0.068 | 0.067 |

|       |       |       |
|-------|-------|-------|
| 0.063 | 0.064 | 0.058 |
|-------|-------|-------|

| C     | T     | CHA   |
|-------|-------|-------|
| 0.099 | 0.083 | 0.076 |
| 0.134 | 0.087 | 0.082 |
| 0.124 | 0.084 | 0.08  |
| 0.113 | 0.084 | 0.072 |
| 0.111 | 0.083 | 0.067 |
| 0.122 | 0.083 | 0.079 |

|       |       |       |
|-------|-------|-------|
| 0.054 | 0.053 | 0.056 |
| 0.045 | 0.048 | 0.043 |
| 0.045 | 0.049 | 0.046 |

0.701009028 0.828963795 0.872059667  
0.948840503 0.868913858 0.940906483  
0.87803151 0.838951311 0.917957544  
0.800141618 0.838951311 0.82616179  
0.785979819 0.828963795 0.768789443  
0.863869711 0.828963795 0.906483075

|       |       |
|-------|-------|
| 0.063 | 0.061 |
| 0.081 | 0.071 |
| 0.51  | 0.07  |
| 0.055 | 0.059 |
| 0.053 |       |
| 0.079 |       |
| 0.053 |       |

| C     | T     | T+C   | CHA   |
|-------|-------|-------|-------|
| 0.069 | 0.054 | 0.091 | 0.154 |
| 0.256 | 0.091 | 0.134 | 0.062 |
| 0.061 | 0.082 | 0.108 | 0.056 |
| 0.063 | 0.081 | 0.51  | 0.055 |
| 0.061 | 0.071 | 0.07  | 0.059 |

0.258725166 0.076827043 0.904717772 1.291989664  
3.951141795 0.629213483 2.203098107 -0.15503876  
0.02212781 0.686641698 1.721170396 -0.080749354  
0.318640467 0.988764045 15.90361446 0.135658915  
0.163405368 0.518582541 0.562690322 0.111806798

C组 GTP组 GTP+TBA组  
3.942644716 5.333333333 2.753872633  
4.121083378 4.554307116 3.511187608  
3.883165162 5.393258427 4.323580034  
4.163568773 4.973782772 3.373493976  
4.206054169 4.194756554 3.30464716

| GTP+TBA组 | C组           | TBA组        | GTP组        | GTP+TBA组    |
|----------|--------------|-------------|-------------|-------------|
| 0.075    | 9.661836E-02 | 0.15241579  | 0.148969134 | 0.194003527 |
| 0.065    | 1.019860E-01 | 0.137174211 | 0.145658708 | 0.252792475 |
| 0.093    | 3.220612E-02 | 0.060966316 | 0.132417008 | 0.088183422 |
| 0.105    | 1.019860E-01 | 0.102880658 | 0.066208504 | 0.017636684 |
| 0.073    | 8.051530E-02 | 0.076207895 | 0.132417008 | 0.205761317 |

|       |
|-------|
| 12    |
| 0.354 |
| 0.443 |
| 0.505 |
| 0.513 |
| 0.648 |
| 0.541 |
| 0.054 |
| 0.07  |

rol

+TBBPA

PA

|       |  |
|-------|--|
| T+C   |  |
| 0.068 |  |
| 0.058 |  |
| 0.074 |  |
| 0.07  |  |
| 0.068 |  |
| 0.067 |  |
|       |  |

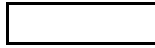

0. 439276486  
0. 374677003  
0. 478036176  
0. 452196382  
0. 439276486  
0. 432816537

| 空白孔   | 标准孔   | 对照孔   |
|-------|-------|-------|
| 0.053 | 0.092 | 0.05  |
| 0.051 | 0.076 | 0.07  |
| 0.052 | 0.076 | 0.06  |
| 0.052 | 0.077 | 0.048 |
| 0.053 | 0.079 | 0.053 |

TBA组

1. 744186047  
2. 403100775  
1. 627906977  
1. 666666667  
2. 131782946
